# Supplementary material for: Photochemical reactivity of diarylethenes: effects of carboxyl group derivatives
Source: Royal Society of Chemistry journal article supplement (doi:10.1039/d5ob01693b), 2026-01-01

## Photochemical Reactivity of Diarylethenes: Effect of Carboxyl Group Derivatives

*Ekaterina S. Sergeeva,<sup>a,b</sup> Anna A. Faizdrakhmanova,<sup>a,c</sup> Anna V. Vologzhanina,<sup>d</sup>  
Igor A. Ushakov,<sup>a</sup> Aleksei A. Anisimov,<sup>d</sup> Pavel V. Dorovatovskii,<sup>e</sup> Nikolay I. Tikhonov,<sup>a</sup>  
Andrey G. Lvov<sup>\*a,c</sup>*

<sup>a</sup> *A. E. Favorsky Irkutsk Institute of Chemistry, Siberian Branch of the Russian Academy of Sciences, Favorsky St., 1, Irkutsk, 664033, Russia. E-mail: [lvov-andre@yandex.ru](mailto:lvov-andre@yandex.ru)*

<sup>b</sup> *N. D. Zelinsky Institute of Organic Chemistry, Russian Academy of Sciences, Leninsky prospect, 47, Moscow, 119991, Russia*

<sup>c</sup> *Irkutsk National Research Technical University, Lermontov St., 83, Irkutsk, 664074, Russia*

<sup>d</sup> *A. N. Nesmeyanov Institute of Organoelement Compounds of the Russian Academy of Science, Vavilova St., 28, Moscow, 119991, Russia*

<sup>e</sup> *Kurchatov Institute, National Research Center, Kurchatov Sq., 1, Moscow, 123182, Russia*

### Table of contents

|                                                             |           |
|-------------------------------------------------------------|-----------|
| <b>I. Experimental details</b> .....                        | <b>2</b>  |
| <b>I.1 Synthesis of diarylethenes</b> .....                 | <b>3</b>  |
| <b>II.2 Photochemical reactions of diarylethenes</b> .....  | <b>7</b>  |
| <b>II. NMR studies</b> .....                                | <b>12</b> |
| <b>II.1 NMR monitoring of photochemical reactions</b> ..... | <b>12</b> |
| <b>II.2 VT-NMR for 2</b> .....                              | <b>26</b> |
| <b>II.3 2D NOESY for 4</b> .....                            | <b>27</b> |
| <b>III. Absorption spectroscopy</b> .....                   | <b>28</b> |
| <b>IV. X-ray crystallography</b> .....                      | <b>31</b> |
| <b>V. Copies of NMR spectra</b> .....                       | <b>42</b> |
| <b>VI. Copies of HRMS spectra</b> .....                     | <b>61</b> |

## I. Experimental details

**General information.** All commercially available reagents were used without further purification. Column chromatography was performed using silica gel 60 (0.063-0.200 mm) by Th.Geyer; TLC analysis was conducted on silica gel 60 F<sub>254</sub> plates.

<sup>1</sup>H (400 MHz) and <sup>13</sup>C (101 MHz) NMR spectra were recorded on a Bruker AV400 instrument in CDCl<sub>3</sub>, (CD<sub>3</sub>)<sub>2</sub>SO, and D<sub>2</sub>O. Chemical shifts are reported in ppm using the residual signals of CDCl<sub>3</sub>, (CD<sub>3</sub>)<sub>2</sub>SO, or D<sub>2</sub>O as internal standards. Data is reported as chemical shifts ( $\delta$ ) in ppm, multiplicity (s = singlet, d = doublet, dd = doublet of doublets, t = triplet, q = quartet, br = broad, m = multiplet), coupling constants *J* (Hz), and integration. Mass-spectra were obtained on Shimadzu GCMS-QP5050A (70 eV) paired with a GC-17A gas chromatograph and direct sample injection into an ion source. High Resolution Mass Spectra (HRMS) were recorded using Agilent 1200/Agilent 6210 TOF HPLC and Bruker micrOTOF spectrometers equipped with an electrospray ionization source (ESI). Melting points (uncorrected) were measured on a SMP10 apparatus (Stuart).

Electronic absorption spectra were recorded with a SF-56 spectrophotometer in 1 cm quartz cuvettes. The experimental measurements were performed in solutions of dry DCM, acetonitrile, acetone and distilled H<sub>2</sub>O in the presence of air. UV irradiation was carried out by Vilber Lourmat lamps with  $\lambda$  = 365 and 313 nm (15 W and 8W). The common borosilicate glass vessels and NMR tubes were used for all photolysis experiments. To prevent heating of the vessels and tubes during light irradiation, they were located 5 cm from the lamp. The light was directed from the side of the vessels and tubes.

Electron spin resonance (ESR) spectroscopy was performed at 260 K with an X-band Bruker ELEXSYS E580 ESR spectrometer equipped with ER 4131VT temperature controller and 4102ST-O-LC resonator.

## I.1 Synthesis of diarylethenes

**Methyl 2-(2-methoxy-2-oxoethyl)benzoate (3).** To a solution of **HPA** (100 mg, 0.56 mmol) in DMF (5 mL)  $\text{K}_2\text{CO}_3$  (77 mg, 0.56 mmol, 1 equiv.) was added. The reaction mixture was stirred for 30 min at room temperature, then  $\text{CH}_3\text{I}$  (0.04 mL, 0.56 mmol, 1 equiv.) was added and stirred for 3 days at room temperature. After reaction was completed (monitoring by NMR), the reaction mixture was poured into water (50 mL) and extracted with ethyl acetate ( $3 \times 20$  mL); the combined organic layers were washed with water, dried over anhydrous  $\text{MgSO}_4$ , and evaporated in vacuum. The residue was purified by column chromatography eluting by petrol. ester / ethyl acetate 8:1 to give **3**.

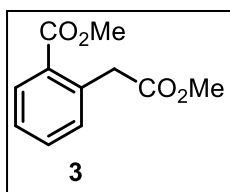

Yield 30 mg (52%), yellow oil.

$^1\text{H}$  NMR (400 MHz,  $\text{CDCl}_3$ ):  $\delta$  = 8.02 (d,  $J$  = 6.3 Hz, 1H), 7.49 (t,  $J$  = 7.5 Hz, 1H), 7.37 (t,  $J$  = 7.7 Hz, 1H), 7.27 (s, 1H), 4.01 (s, 2H), 3.87 (s, 3H), 3.70 (s, 3H).

$^{13}\text{C}\{^1\text{H}\}$  NMR (101 MHz,  $\text{CDCl}_3$ ):  $\delta$  = 172.1, 167.6, 136.1, 132.5, 132.4, 131.1, 129.7, 127.6, 52.1, 52.1, 40.6.

Mass spectrum,  $m/z$  ( $I_{\text{rel}}$ , %): 208  $[\text{M}]^+$  (0.31), 148 (100).

**2-(2-(Methoxycarbonyl)phenyl)acetic acid (4).** To a solution of **HPA** (5.00 g, 28 mmol) in DMF (30 mL)  $\text{NaHCO}_3$  (2.25 g, 28 mmol, 1 equiv.) was added. The reaction mixture was stirred for 30 min at room temperature, then a solution of  $\text{CH}_3\text{I}$  (1.7 mL, 28 mmol, 1 equiv.) in DMF (10 mL) was added dropwise and stirred for 16 h at room temperature. After reaction was completed (monitoring by NMR), the reaction mixture was poured into water (300 mL) and extracted with ethyl acetate ( $3 \times 80$  mL); the combined organic layers were washed with water, dried over anhydrous  $\text{MgSO}_4$ , and evaporated in vacuum.

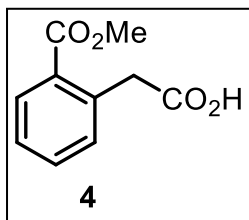

Yield 4.5 g (65%), white powder, mp 145-147 °C (lit. 146-148 °C<sup>[1]</sup>).

$^1\text{H}$  NMR (400 MHz,  $\text{CDCl}_3$ ):  $\delta$  = 8.02 (d,  $J$  = 6.2 Hz, 1H), 7.51 (t,  $J$  = 7.6 Hz, 1H), 7.38 (t,  $J$  = 7.6 Hz, 1H), 7.30 (d,  $J$  = 7.6 Hz, 1H), 4.03 (s, 2H), 3.90 (s, 3H).

$^{13}\text{C}\{^1\text{H}\}$  NMR (101 MHz,  $\text{CDCl}_3$ ):  $\delta$  = 177.2, 167.9, 135.5, 132.7, 132.5, 131.2, 129.6, 127.8, 52.3, 40.8.

Mass spectrum,  $m/z$  ( $I_{\text{rel}}$ , %): 194  $[\text{M}]^+$  (0.59), 118 (100).

<sup>1</sup> K. J. McCullough, H. Tokuhara, A. Masuyama and M. Nojima, *Org. Biomol. Chem.*, 2003, **1**, 1522–1527.

**Synthesis of ester diarylethenes 1 and 2.** Acid **4** (1.25 g, 6.4 mmol, 1 equiv.) and  $K_2CO_3$  (1.33 g, 9.7 mmol, 1.5 equiv.) were added in argon atmosphere into Schlenk flask, then dry DMF (25 mL) was added. The resulting suspension was stirred at room temperature for 30 min, and then bromoketone **5** (6.4 mmol, 1 equiv.) was added in argon atmosphere. The reaction mixture was stirred for 3 h at 80 °C; after the reaction was completed (TLC control), the mixture was poured into ice water (500 mL) and extracted with ethyl acetate (4 × 50 mL); the combined organic layers were washed water (2 × 250 mL), then dried over anhydrous  $MgSO_4$ , and evaporated in vacuum. The residue was purified by column chromatography eluting by petrol. ester / ethyl acetate 2:1.

**Methyl 2-(4-(4-methoxyphenyl)-2-oxo-2,5-dihydrofuran-3-yl)benzoate (1).**

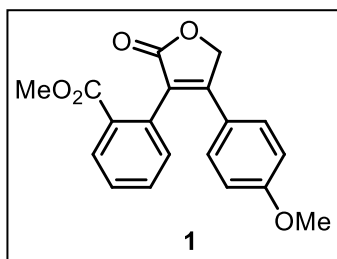

Yield 827 mg (40%), white powder, mp 147-149 °C.  $^1H$  NMR (400 MHz,  $CDCl_3$ ):  $\delta$  = 8.11 (d,  $J$  = 7.5 Hz, 1H), 7.56 – 7.43 (m, 2H), 7.24 (d,  $J$  = 7.3 Hz, 1H), 7.15 (d,  $J$  = 8.9 Hz, 2H), 6.79 (d,  $J$  = 8.9 Hz, 2H), 5.24 (br. s, 2H), 3.79 (d,  $J$  = 7.5 Hz, 6H).  $^1H$  NMR (400 MHz,  $DMSO-d_6$ ):  $\delta$  = 8.02 (d,  $J$  = 7.7 Hz, 1H), 7.64 (t,  $J$  = 7.5 Hz, 1H), 7.58 (t,  $J$  = 7.5 Hz, 1H), 7.27 (d,  $J$  = 7.3 Hz, 1H), 7.21 (d,  $J$  = 9.1 Hz, 2H), 6.92 (d,  $J$  = 8.9 Hz, 2H), 5.53 (br. s, 1H), 5.30 (br. s, 1H), 3.74 (s, 3H), 3.70 (s, 3H).

$^{13}C\{^1H\}$  NMR (101 MHz,  $CDCl_3$ ):  $\delta$  = 173.4, 166.8, 161.4, 153.8, 132.8, 132.6, 131.1, 131.2, 130.8, 129.1 (2C), 128.9, 125.5, 123.0, 114.4 (2C), 70.7, 55.4, 52.3.

HRMS (ESI-TOF)  $m/z$ :  $[M+H]^+$  Calcd for  $C_{19}H_{16}O_5$ : 324.1075; Found: 324.1077.

**Methyl 2-(4-(2-(4-(methoxycarbonyl)phenyl)-5-methyloxazol-4-yl)-2-oxo-2,5-dihydrofuran-3-yl)benzoate (2).**

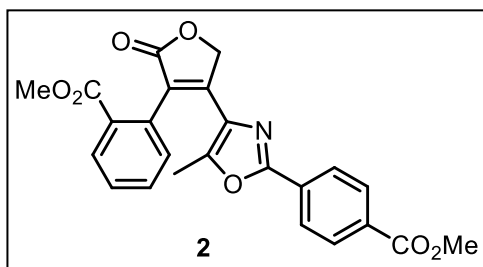

Yield 809 mg (29%), orange powder, mp 175-177 °C.  $^1H$  NMR (400 MHz,  $CDCl_3$ ):  $\delta$  = 8.15 – 7.99 (m, 5H), 7.54 – 7.46 (m, 2H), 7.27 (d,  $J$  = 7.5 Hz, 1H), 5.44 (s, 1H), 5.17 (s, 1H), 3.95 (s, 3H), 3.85 (s, 3H), 1.81 (s, 3H).  $^1H$  NMR (400 MHz,  $DMSO-d_6$ ):  $\delta$  = 8.08 (d,  $J$  = 8.6 Hz, 2H), 8.03 – 7.91 (m, 3H), 7.69 – 7.54 (m, 2H), 7.38 (dd,  $J$  = 7.5, 1.5 Hz, 2H), 5.46 (br. s, 1H), 5.38 (br. s, 1H), 3.88 (s, 3H), 3.69 (s, 3H), 2.05 (s, 3H).

$^{13}C\{^1H\}$  NMR (101 MHz,  $CDCl_3$ ):  $\delta$  = 172.7, 167.3, 166.4, 159.8, 150.0, 147.4, 132.1, 132.1, 131.8, 131.2, 131.0, 130.7, 130.4, 130.1, 129.3, 129.0, 127.5, 126.2, 71.0, 52.4, 11.7.

HRMS (ESI-TOF)  $m/z$ :  $[M+H]^+$  Calcd for  $C_{24}H_{19}NO_7$ : 433.1237; Found: 433.1239.

**Synthesis of acid 6.** Diarylethene **1** (200 mg, 0.6 mmol) was suspended in EtOH (2.5 mL). Solution of KOH (173 mg, 3.1 mmol, 5 equiv.) in water (2.5 mL) was added. The reaction mixture was refluxed for 10 min, then poured into water (50 mL) and washed with ethyl acetate (1 × 20 mL); then mixture was acidified with HCl<sub>aq</sub> to pH = 4, extracted with ethyl acetate (3 × 20 mL). The combined organic layers were washed with distilled water, dried over anhydrous MgSO<sub>4</sub>, and evaporated in vacuum. The residue was treated with hexane (5 mL) and the formed precipitate was filtered off. The single crystal of **6** was obtained by slow evaporation of the mother liquor.

**2-(4-(4-Methoxyphenyl)-2-oxo-2,5-dihydrofuran-3-yl)benzoic acid (6).**

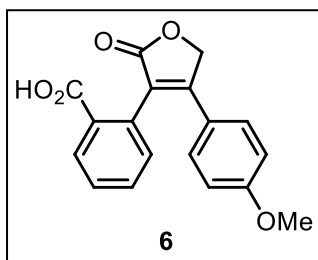

Yield 168 mg (88%), white powder, mp 114-116 °C.

<sup>1</sup>H NMR (400 MHz, DMSO-*d*<sub>6</sub>): δ = 12.89 (s, 1H), 8.05 (d, *J* = 7.6 Hz, 1H), 7.65 – 7.51 (m, 2H), 7.25 – 7.16 (m, 2H), 6.91 (d, *J* = 8.9 Hz, 2H), 5.56 (d, *J* = 17.4 Hz, 1H), 5.21 (d, *J* = 17.0 Hz, 1H), 3.74 (s, 3H).

<sup>13</sup>C{<sup>1</sup>H} NMR (101 MHz, DMSO-*d*<sub>6</sub>): δ = 172.9, 167.3, 160.9, 153.8,

132.7, 132.5, 131.6, 130.9, 130.7, 129.2 (2C), 128.8, 124.8, 122.7, 114.4 (2C), 70.5, 55.3.

HRMS (ESI-TOF) *m/z*: [M+H]<sup>+</sup> Calcd for C<sub>18</sub>H<sub>12</sub>O<sub>5</sub>: 311.0914; Found: 311.0914.

**Synthesis of acid 7.** Diarylethene **2** (150 mg, 0.35 mmol) was partially dissolved in EtOH (1.4 mL). Then the solution of KOH (97 mg, 1.73 mmol, 5 equiv.) in water (1.4 mL) was added. The reaction mixture was refluxed for 10 min, then poured into water (50 mL) and washed with ethyl acetate (1 × 20 mL); then mixture was acidified with HCl to pH = 4, extracted with ethyl acetate (3 × 20 mL). The combined organic layers were washed with distilled water, dried over anhydrous MgSO<sub>4</sub>, and evaporated in vacuum. The residue was treated with hexane (5 mL) and the formed precipitate was filtered off.

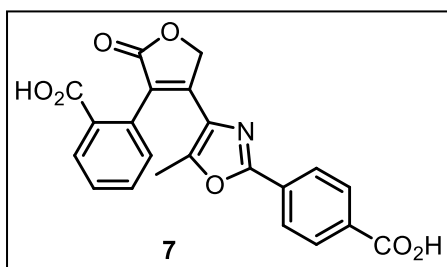

**2-(4-(2-(4-Carboxyphenyl)-5-methyloxazol-4-yl)-2-oxo-2,5-dihydrofuran-3-yl)benzoic acid (7).**

Yield 124 mg (89%), white powder, mp 167-169 °C.

<sup>1</sup>H NMR (400 MHz, DMSO-*d*<sub>6</sub>): δ = 13.05 (s, 2H), 8.06 (d, *J* = 8.6 Hz, 2H), 8.00 (dd, *J* = 7.5, 1.8 Hz, 1H), 7.94 (d, *J* = 8.6 Hz, 2H), 7.65 – 7.52 (m, 2H), 7.32 (d, *J* = 7.3 Hz, 1H), 5.48 (d, *J* = 17.5 Hz, 1H), 5.29 (d, *J* = 16.7 Hz, 1H), 1.98 (s, 3H).

<sup>13</sup>C{<sup>1</sup>H} NMR (101 MHz, DMSO-*d*<sub>6</sub>): δ = 172.3, 167.7, 166.6, 158.7, 150.3, 146.7, 132.5, 131.9, 131.8 (2C), 131.2, 130.1, 129.5, 129.0 (2C), 128.8, 126.7, 125.9, 70.3, 11.3.

HRMS (ESI-TOF) *m/z*: [M+H]<sup>+</sup> Calcd for C<sub>22</sub>H<sub>15</sub>NO<sub>7</sub>: 406.0921; Found: 406.0921.

**Synthesis of salt 8.** Diarylethene acid **6** (219 mg, 0.7 mmol) was dissolved in MeOH (3 mL), and then KOH (40 mg, 0.7 mmol, 1 equiv.) was added. The reaction mixture was stirred at room temperature for 5 min, and then solvent was evaporated in vacuum. The resulting precipitate was washed with ethyl acetate and dried in vacuum.

**Potassium 2-(4-(4-methoxyphenyl)-2-oxo-2,5-dihydrofuran-3-yl)benzoate (8).**

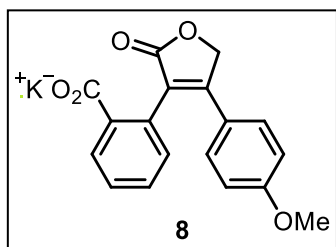

Yield 177 mg (72%), white powder, mp > 300 °C.

$^1\text{H}$  NMR (400 MHz,  $\text{D}_2\text{O}$ ):  $\delta$  = 7.80 (d,  $J$  = 7.5 Hz, 1H), 7.57 – 7.44 (m, 2H), 7.26 (d,  $J$  = 8.8 Hz, 2H), 7.17 (d,  $J$  = 7.5 Hz, 1H), 6.87 (d,  $J$  = 7.9 Hz, 2H), 5.38 (d,  $J$  = 14.2 Hz, 2H), 3.79 (s, 3H).

$^{13}\text{C}\{^1\text{H}\}$  NMR (101 MHz,  $\text{D}_2\text{O}$ ):  $\delta$  = 177.3, 175.2, 160.9, 156.7, 138.7, 130.3, 130.2, 129.5 (2C), 129.4, 129.2, 128.9, 124.4, 122.9, 114.3 (2C), 72.0, 55.3.

HRMS (ESI-TOF)  $m/z$ :  $[\text{M}-\text{K}+2\text{H}]^+$  Calcd for  $\text{C}_{18}\text{H}_{13}\text{KO}_5$ : 311.0914; Found: 311.0916.

**Synthesis of salt 9.** Diarylethene acid **7** (84 mg, 0.2 mmol) was suspended in MeOH (3 mL), and then KOH (21 mg, 0.4 mmol, 2 equiv.) was added. The reaction mixture was stirred at room temperature for 5 min, and then solvent was evaporated in vacuum. The resulting precipitate was washed with ethyl acetate and dried in vacuum.

**Potassium 2-(4-(2-(4-carboxylatophenyl)-5-methyloxazol-4-yl)-2-oxo-2,5-dihydrofuran-3-yl)benzoate (9).**

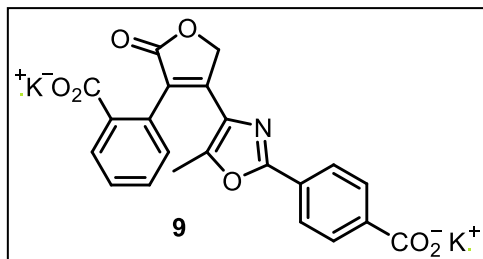

Yield 91 mg (91%), white powder, mp > 300 °C.

$^1\text{H}$  NMR (400 MHz,  $\text{D}_2\text{O}$ ):  $\delta$  = 7.91 (s, 4H), 7.79 (d,  $J$  = 6.9 Hz, 1H), 7.56 – 7.45 (m, 2H), 7.29 (d,  $J$  = 6.7 Hz, 1H), 5.36 (d,  $J$  = 15.6 Hz, 2H), 1.88 (s, 3H).

$^{13}\text{C}\{^1\text{H}\}$  NMR (101 MHz,  $\text{D}_2\text{O}$ ):  $\delta$  = 176.2, 175.3, 174.6, 160.6, 151.3, 148.8, 138.7, 138.5, 130.6, 129.9, 129.3 (2C), 129.1 (2C), 128.9, 127.9, 127.8, 127.0, 126.0 (2C), 71.8, 10.8.

HRMS (ESI-TOF)  $m/z$ :  $[\text{M}-2\text{K}+3\text{H}]^+$  Calcd for  $\text{C}_{22}\text{H}_{13}\text{K}_2\text{NO}_7$ : 406.0921; Found: 406.0929.

## II.2 Photochemical reactions of diarylethenes

### Synthesis of photoproducts 10, 11, 12.

**Scheme S1.** Synthetic routes to photoproducts **10**, **11**, **12**.

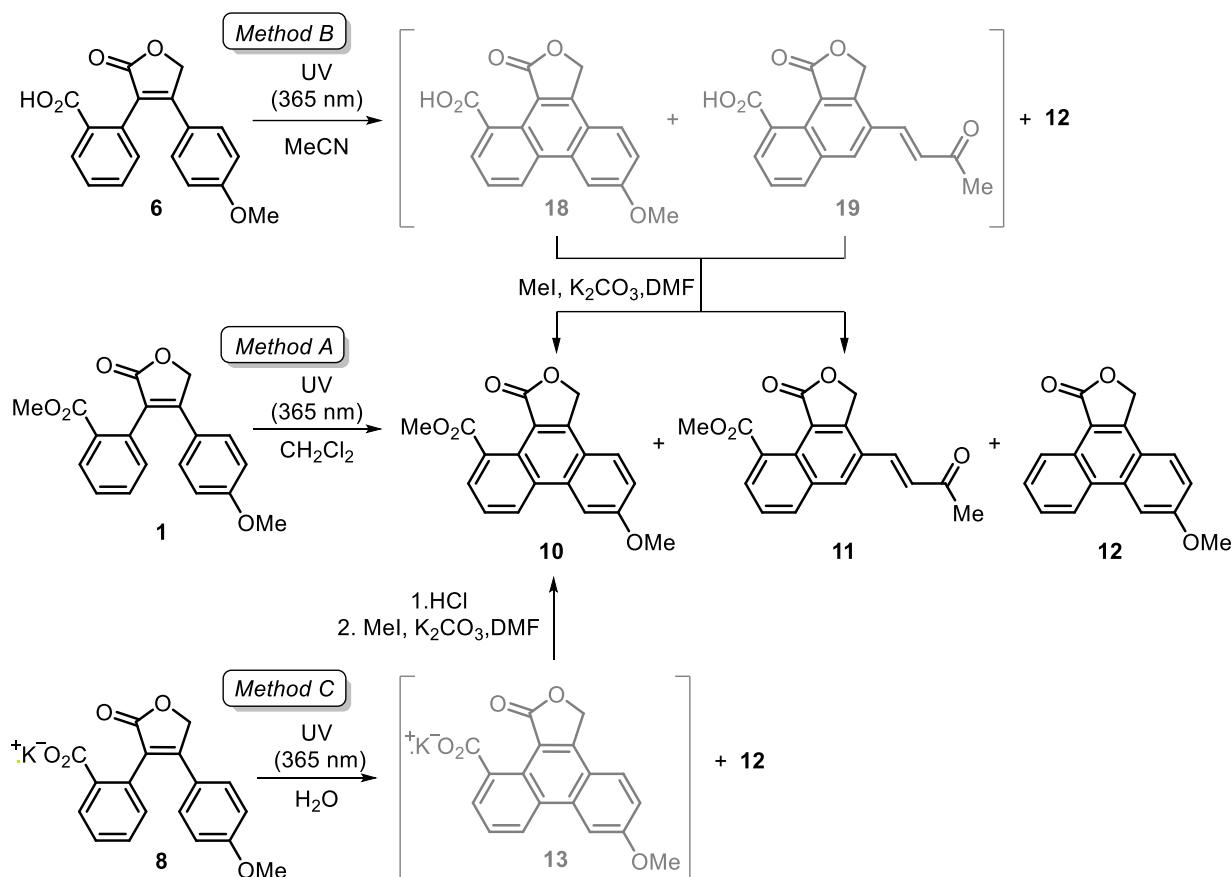

**Method A.** Diarylethene **1** (65 mg, 0.2 mmol) was dissolved in anhydrous dichloromethane (50 mL). The reaction mixture was irradiated with UV light (365 nm, 15 W) for 27 h, then products were separated by column chromatography eluting by petroleum ester / ethyl acetate 3:1 and purified by recrystallization from hexane.

**Method B.** Diarylethene acid **6** (100 mg, 0.3 mmol) was dissolved in anhydrous acetonitrile (50 mL). The reaction mixture was irradiated with UV light (365 nm, 15 W) for 23 h, then solvent was evaporated in vacuum. To obtained dry reaction mixture  $\text{K}_2\text{CO}_3$  (222 mg, 1.6 mmol, 5 equiv.) in DMF (2 mL) was added, reaction mixture was stirred at room temperature for 5 min, then MeI (0.04 mL, 0.7 mmol, 2 equiv.) was added. The reaction mixture was stirred further for 10 min, poured into water (50 mL), extracted with ethyl acetate ( $3 \times 20$  mL), washed with water ( $1 \times 50$  mL), dried over anhydrous  $\text{MgSO}_4$ , and evaporated in vacuum. The alkylated products were separated by column chromatography eluting by petroleum ester / ethyl acetate 3:1 and purified by recrystallization from hexane.

**Method C.** Diarylethene salt **8** (85 mg, 0.3 mmol) was dissolved in distilled water (35 mL). The reaction mixture was irradiated with UV light (365 nm, 15 W) for 10 h, then HCl was

added to pH = 4, extracted with ethyl acetate (3 × 20 mL). The combined organic layers were washed with distilled water, dried over anhydrous MgSO<sub>4</sub>, and evaporated in vacuum. The residue was dissolved in DMF (2 mL) and K<sub>2</sub>CO<sub>3</sub> (169 mg, 1.2 mmol, 5 equiv.) was added, reaction mixture was stirred at room temperature for 5 min, then MeI (0.03 mL, 0.5 mmol, 2 equiv.) was added. The reaction mixture was stirred further for 10 min, poured into water (50 mL), extracted with ethyl acetate (3 × 20 mL), washed with water (50 mL), dried over anhydrous MgSO<sub>4</sub>, and evaporated in vacuum. The residue was purified by column chromatography eluting by petroleum ester / ethyl acetate 5:1.

**Methyl 9-methoxy-3-oxo-1,3-dihydrophenanthro[9,10-*c*]furan-4-carboxylate (10).**

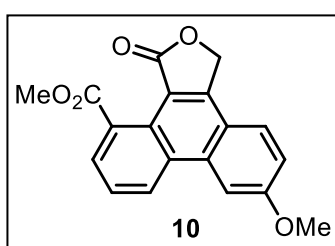

*Method A*: yield 25 mg (39%), *method B*: yield 5 mg (5%), *method C*: yield 10 mg (12%), white powder, mp 220-222 °C.

<sup>1</sup>H NMR (400 MHz, DMSO-*d*<sub>6</sub>): δ = 9.09 (d, *J* = 8.3 Hz, 1H), 8.29 (s, 1H), 7.99 (d, *J* = 8.8 Hz, 1H), 7.89 (d, *J* = 7.2 Hz, 1H), 7.79 (t, *J* = 7.8 Hz, 1H), 7.44 (d, *J* = 8.8 Hz, 1H), 5.76 (s, 1H), 4.05 (s, 1H),

3.82 (s, 1H).

<sup>1</sup>H NMR (400 MHz, CDCl<sub>3</sub>): δ = 8.71 (d, *J* = 8.6 Hz, 1H), 8.05 (s, 1H), 7.95 (d, *J* = 8.5 Hz, 1H), 7.80 – 7.68 (m, 2H), 7.35 (dd, *J* = 8.8, 2.5 Hz, 1H), 5.58 (s, 2H), 4.07 (s, 3H), 3.99 (s, 3H).

<sup>13</sup>C{<sup>1</sup>H} NMR (101 MHz, DMSO-*d*<sub>6</sub>): δ = 170.4, 168.9, 161.5, 151.7, 134.3, 130.6, 130.1, 129.1, 127.0, 126.9, 126.6, 122.6, 119.2, 118.4, 115.1, 105.9, 68.5, 55.9, 52.0.

HRMS (ESI-TOF) *m/z*: [M+H]<sup>+</sup> Calcd for C<sub>19</sub>H<sub>14</sub>O<sub>5</sub> ([M]<sup>+</sup>): 323.0914; Found: 323.0914.

**(*E*)-Methyl 1-oxo-4-(3-oxobut-1-en-1-yl)-1,3-dihydronaphtho[1,2-*c*]furan-9-carboxylate (11).**

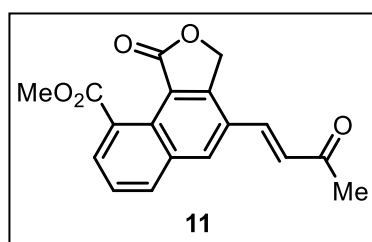

*Method A*: yield 18 mg (29%), *method B*: yield 12 mg (12%).

Yellow amorphous powder.

<sup>1</sup>H NMR (400 MHz, CDCl<sub>3</sub>): δ = 8.32 (s, 1H), 8.09 (d, *J* = 7.0 Hz, 1H), 7.96 (d, *J* = 7.9 Hz, 1H), 7.72 – 7.55 (m, 2H), 6.71 (d, *J* =

16.4 Hz, 1H), 5.51 (s, 2H), 3.98 (s, 3H), 2.46 (s, 3H).

<sup>1</sup>H NMR (400 MHz, DMSO-*d*<sub>6</sub>): δ = 8.84 (s, 1H), 8.32 (d, *J* = 7.5 Hz, 1H), 7.93 (d, *J* = 6.0 Hz, 1H), 7.77 (t, *J* = 7.7 Hz, 1H), 7.71 (d, *J* = 16.5 Hz, 1H), 6.91 (d, *J* = 16.4 Hz, 1H), 5.77 (s, 2H), 3.82 (s, 3H), 2.42 (s, 3H).

<sup>13</sup>C{<sup>1</sup>H} NMR (101 MHz, DMSO-*d*<sub>6</sub>): δ = 197.9, 169.5, 168.5, 150.1, 137.3, 135.5, 133.7, 132.5, 130.9, 130.5, 129.4, 127.7, 126.9, 124.4, 119.9, 69.1, 52.1, 27.8.

HRMS (ESI-TOF) *m/z*: [M+H]<sup>+</sup> Calcd for C<sub>18</sub>H<sub>14</sub>O<sub>5</sub> ([M]<sup>+</sup>): 311.0914; Found: 311.0914.



**6-Methoxyphenanthro[9,10-*c*]furan-1(3*H*)-one (12).**

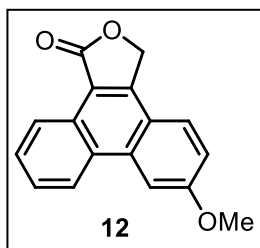

*Method A:* yield 8 mg (15%), *method B:* yield 3 mg (4%), *method C:* yield 17 mg (22%), white powder, mp 186-188°C.

$^1\text{H}$  NMR (400 MHz,  $\text{CDCl}_3$ ):  $\delta$  = 9.13 – 9.06 (m, 1H), 8.63 (d,  $J$  = 7.1 Hz, 1H), 8.12 (s, 1H), 7.82 – 7.70 (m, 3H), 7.34 (dd,  $J$  = 8.8, 2.6 Hz, 1H), 5.61 (s, 2H), 4.08 (s, 3H).

$^1\text{H}$  NMR (400 MHz,  $\text{DMSO}-d_6$ ):  $\delta$  = 8.99 – 8.85 (m, 2H), 8.32 (d,  $J$  = 2.5 Hz, 1H), 8.01 (d,  $J$  = 8.8 Hz, 1H), 7.79 (tt,  $J$  = 7.2, 5.3 Hz, 2H), 7.44 (dd,  $J$  = 8.8, 2.4 Hz, 1H), 5.77 (s, 2H), 4.06 (s, 3H).

$^{13}\text{C}\{^1\text{H}\}$  NMR (101 MHz,  $\text{CDCl}_3$ ):  $\delta$  = 171.5, 161.2, 150.3, 134.6, 129.6, 128.4, 127.3, 127.1, 126.4, 124.3, 122.9, 119.2, 117.8, 115.0, 105.7, 68.6, 55.8.

HRMS (ESI-TOF)  $m/z$ :  $[\text{M}+\text{H}]^+$  Calcd for  $\text{C}_{17}\text{H}_{12}\text{O}_3$  ( $[\text{M}]^+$ ): 265.0859; Found: 265.0859.

## Synthesis of photoproducts **14**, **15**.

**Scheme S2.** Synthetic routes to photoproducts **14**, **15**.

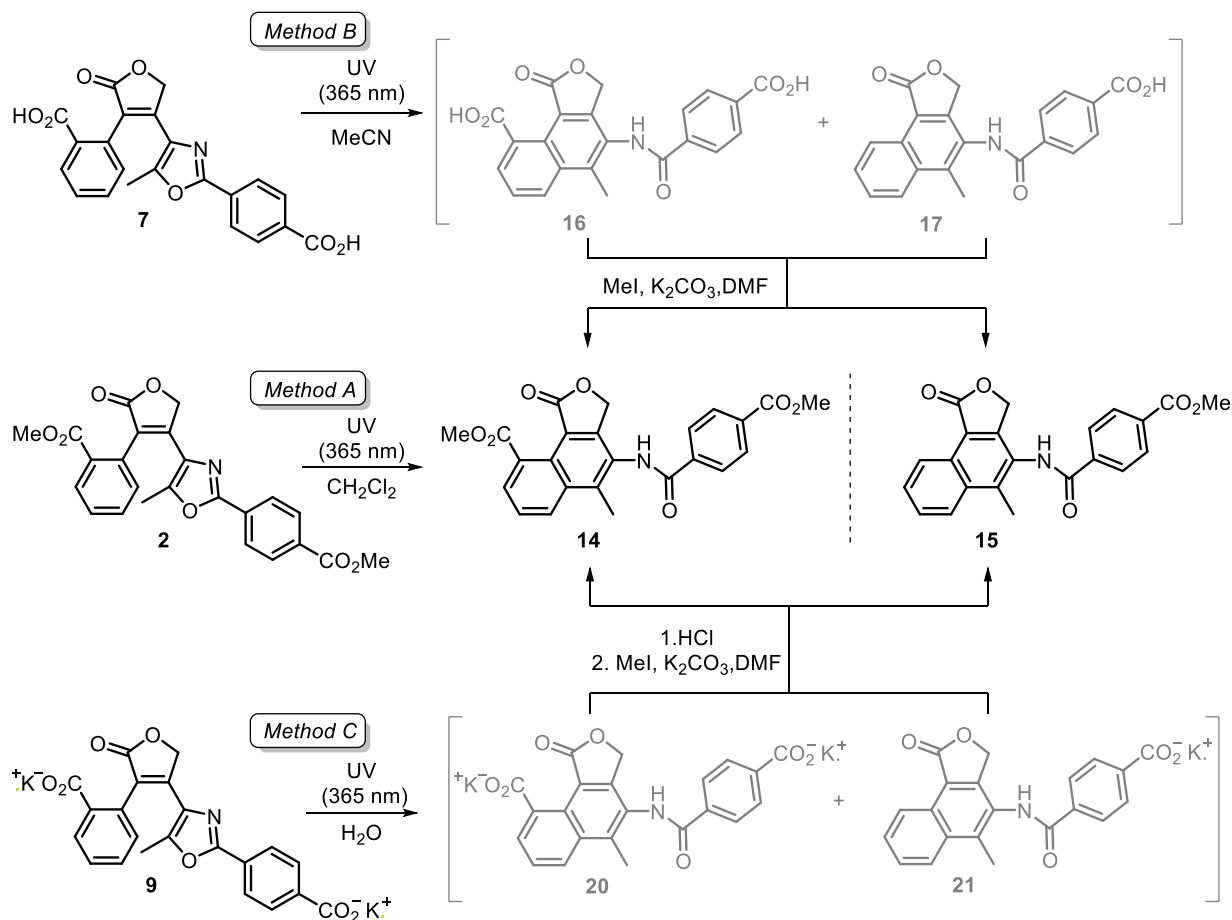

**Method A.** Diarylethene **2** (75 mg, 0.2 mmol) was dissolved in anhydrous dichloromethane (50 mL). The reaction mixture was irradiated with UV light (365 nm, 15 W) for 6 h. After the reaction was completed (TLC control), the solvent was removed in vacuum and the residue was purified by column chromatography eluting by petroleum ester / ethyl acetate 1:1.

**Method B.** Diarylethene acid **7** (70 mg, 0.2 mmol) was dissolved in anhydrous acetonitrile (50 mL). The reaction mixture was irradiated with UV light (365 nm, 15 W) for 13 h, then solvent was evaporated in vacuum. To obtained dry reaction mixture  $\text{K}_2\text{CO}_3$  (119 mg, 0.9 mmol, 5 equiv.) in DMF (2 mL) was added, reaction mixture was stirred at room temperature for 5 min, then MeI (0.04 mL, 0.7 mmol, 4 equiv.) was added. The reaction mixture was stirred for 10 min, poured into water (50 mL), extracted with ethyl acetate ( $3 \times 20$  mL), washed with water ( $1 \times 50$  mL), dried over anhydrous  $\text{MgSO}_4$ , and evaporated in vacuum. The alkylated products were separated by column chromatography eluting by petroleum ester / ethyl acetate 2:1.

**Method C.** Diarylethene salt **9** (170 mg, 0.4 mmol) was dissolved in distilled water (50 mL). The reaction mixture was irradiated with UV light (365 nm, 15 W) for 6 h, then HCl was added to pH = 4, extracted with ethyl acetate ( $3 \times 20$  mL). The combined organic layers were washed with distilled water, dried over anhydrous  $\text{MgSO}_4$ , and evaporated in vacuum. To

obtained dry reaction mixture  $K_2CO_3$  (294 mg, 2.1 mmol, 5 equiv.) in DMF (2 mL) was added, reaction mixture was stirred at room temperature for 5 min, then MeI (0.1 mL, 1.7 mmol, 4 equiv.) was added. The reaction mixture was stirred further for 10 min, poured into water (50 mL), extracted with ethyl acetate ( $3 \times 20$  mL), washed with water ( $1 \times 50$  mL), dried over anhydrous  $MgSO_4$ , and evaporated in vacuum. The alkylated products were separated by column chromatography eluting by petroleum ester / ethyl acetate 2:1.

**Methyl 4-(4-(methoxycarbonyl)benzamido)-5-methyl-1-oxo-1,3-dihydronaphtho [1,2-c]furan-9-carboxylate (14).**

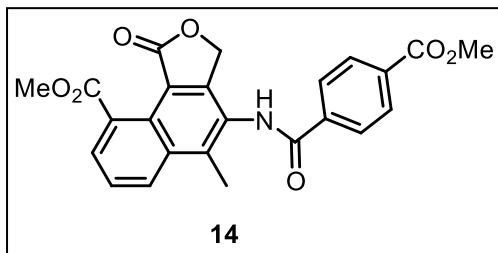

*Method A:* yield 61 mg (81%), *method B:* yield 14 mg (19%), *method C:* yield 25 mg (16%), white powder, mp 285-287°C.

$^1H$  NMR (400 MHz,  $DMSO-d_6$ ):  $\delta$  = 10.73 (s, 1H), 8.49 (d,  $J$  = 8.5 Hz, 1H), 8.17 (q,  $J$  = 8.6 Hz, 4H), 7.94 (d,  $J$  = 7.2 Hz, 1H), 7.81 (t,  $J$  = 7.8 Hz, 1H), 5.44 (s, 2H), 3.92 (s, 3H), 3.82 (s, 3H), 2.73 (s, 3H).

$^1H$  NMR (400 MHz,  $CDCl_3$ ):  $\delta$  = 9.10 (s, 1H), 8.27 – 8.22 (m, 4H), 8.03 (d,  $J$  = 8.6 Hz, 1H), 7.68 (d,  $J$  = 7.0 Hz, 1H), 7.55 (d,  $J$  = 7.2 Hz, 1H), 4.64 (br. s, 2H), 4.00 (d,  $J$  = 6.6 Hz, 6H), 2.57 (s, 3H).

$^{13}C\{^1H\}$  NMR (101 MHz,  $DMSO-d_6$ ):  $\delta$  = 169.6, 168.7, 165.6, 165.1, 149.2, 139.2, 137.6, 133.7, 132.5, 129.8, 129.5, 129.3 (2C), 128.7, 128.5, 128.3 (2C), 126.6, 123.2, 118.1, 68.3, 52.5, 52.1, 14.8. HRMS (ESI-TOF)  $m/z$ :  $[M+H]^+$  Calcd for  $C_{24}H_{19}NO_7$  ( $[M]^+$ ): 434.1234; Found: 433.1234.

**Methyl 4-((5-methyl-1-oxo-1,3-dihydronaphtho[1,2-c]furan-4-yl)carbamoyl)benzoate (15).**

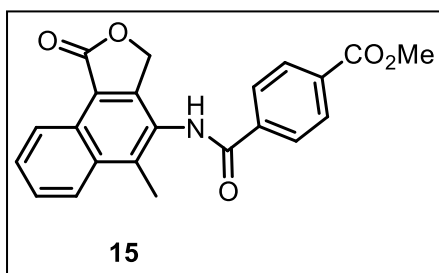

*Method B:* yield 4 mg (6%), *method C:* yield 42 mg (32%), white powder, mp 151-153°C.

$^1H$  NMR (400 MHz,  $DMSO-d_6$ ):  $\delta$  = 10.66 (s, 1H), 8.90 (d,  $J$  = 8.0 Hz, 1H), 8.32 (d,  $J$  = 9.1 Hz, 1H), 8.17 (q,  $J$  = 8.6 Hz, 4H), 7.87 – 7.73 (m, 2H), 5.42 (s, 2H), 3.92 (s, 3H), 2.70 (s, 3H).

$^{13}C\{^1H\}$  NMR (101 MHz,  $DMSO-d_6$ ):  $\delta$  = 170.8, 165.7, 164.9, 147.8, 138.9, 137.8, 132.9, 132.4, 129.3 (2C), 128.5, 128.3 (2C), 127.7, 127.5, 127.3, 125.8, 122.5, 117.6, 68.5, 52.5, 14.5.

HRMS (ESI-TOF)  $m/z$ :  $[M+H]^+$  Calcd for  $C_{22}H_{17}NO_5$  ( $[M]^+$ ): 376.1180; Found: 376.1182.

## II. NMR studies

### II.1 NMR monitoring of photochemical reactions

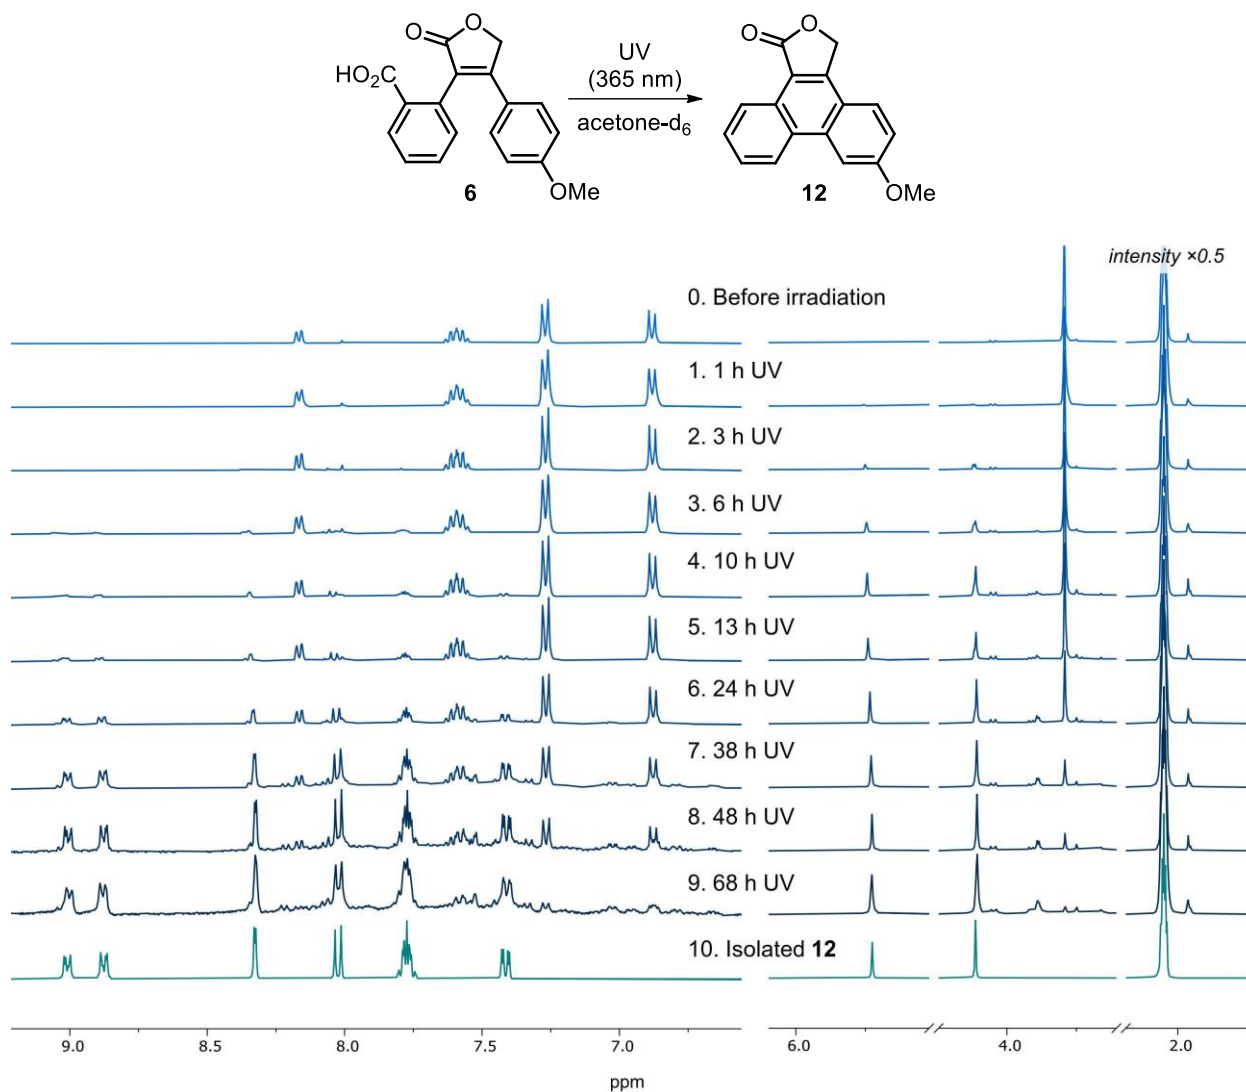

**Figure S1.**  $^1\text{H}$  NMR monitoring of **6** irradiated by UV light (365 nm) in acetone- $d_6$  over 68 h from top to bottom.

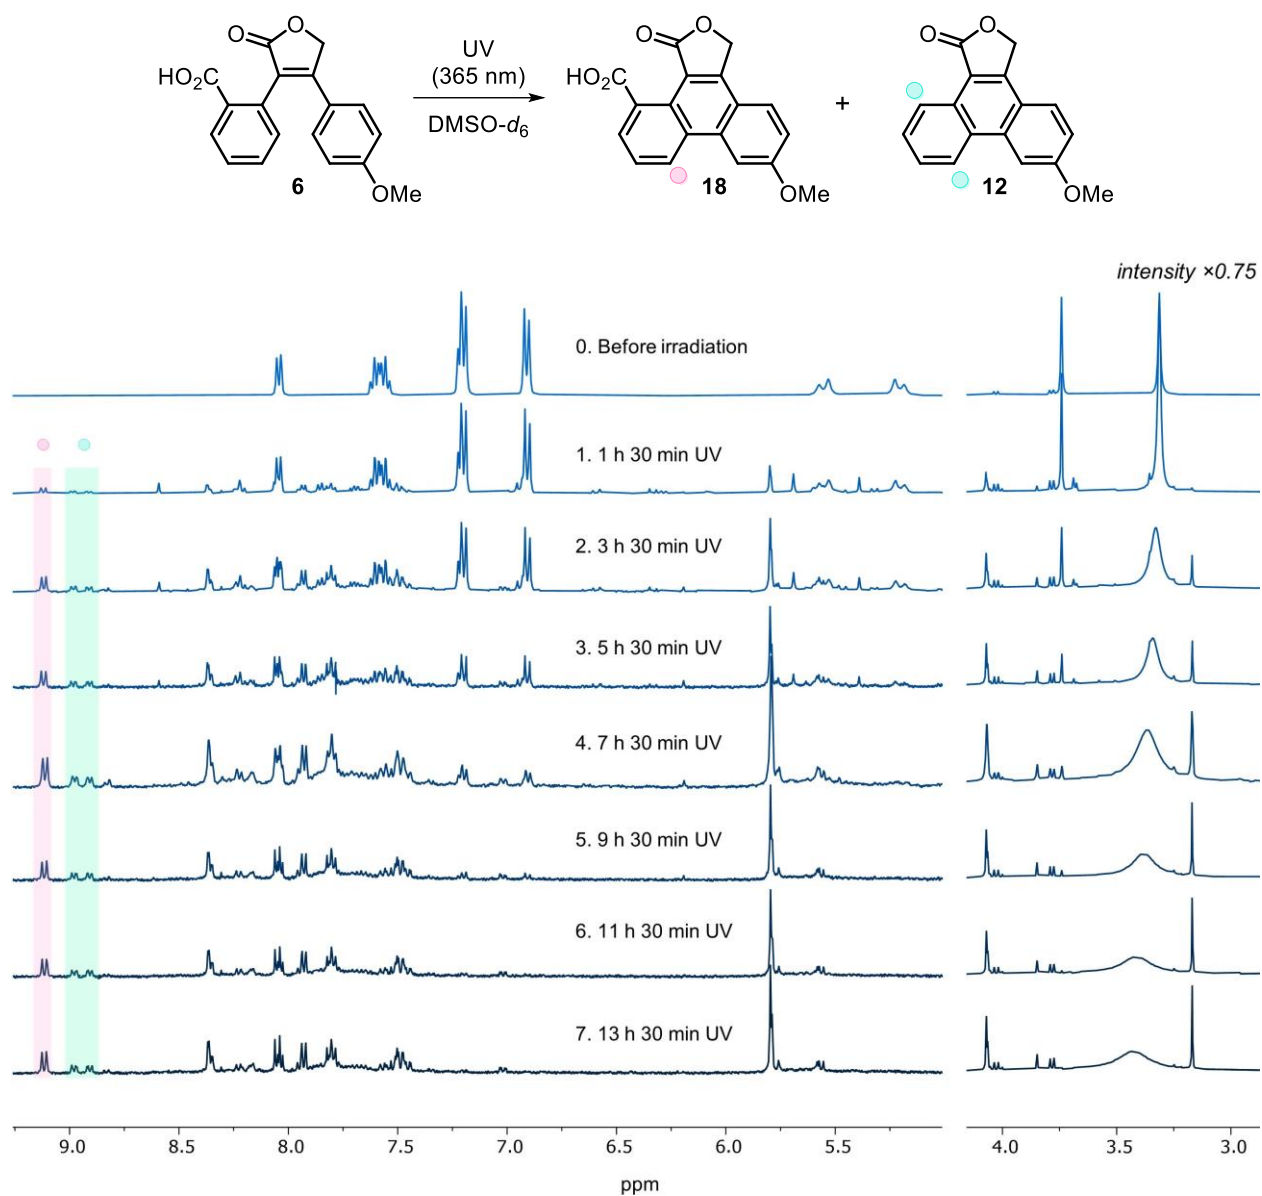

**Figure S2.**  $^1\text{H}$  NMR monitoring of **6** irradiated by UV light (365 nm) in DMSO- $d_6$  over 13 h 30 min from top to bottom.

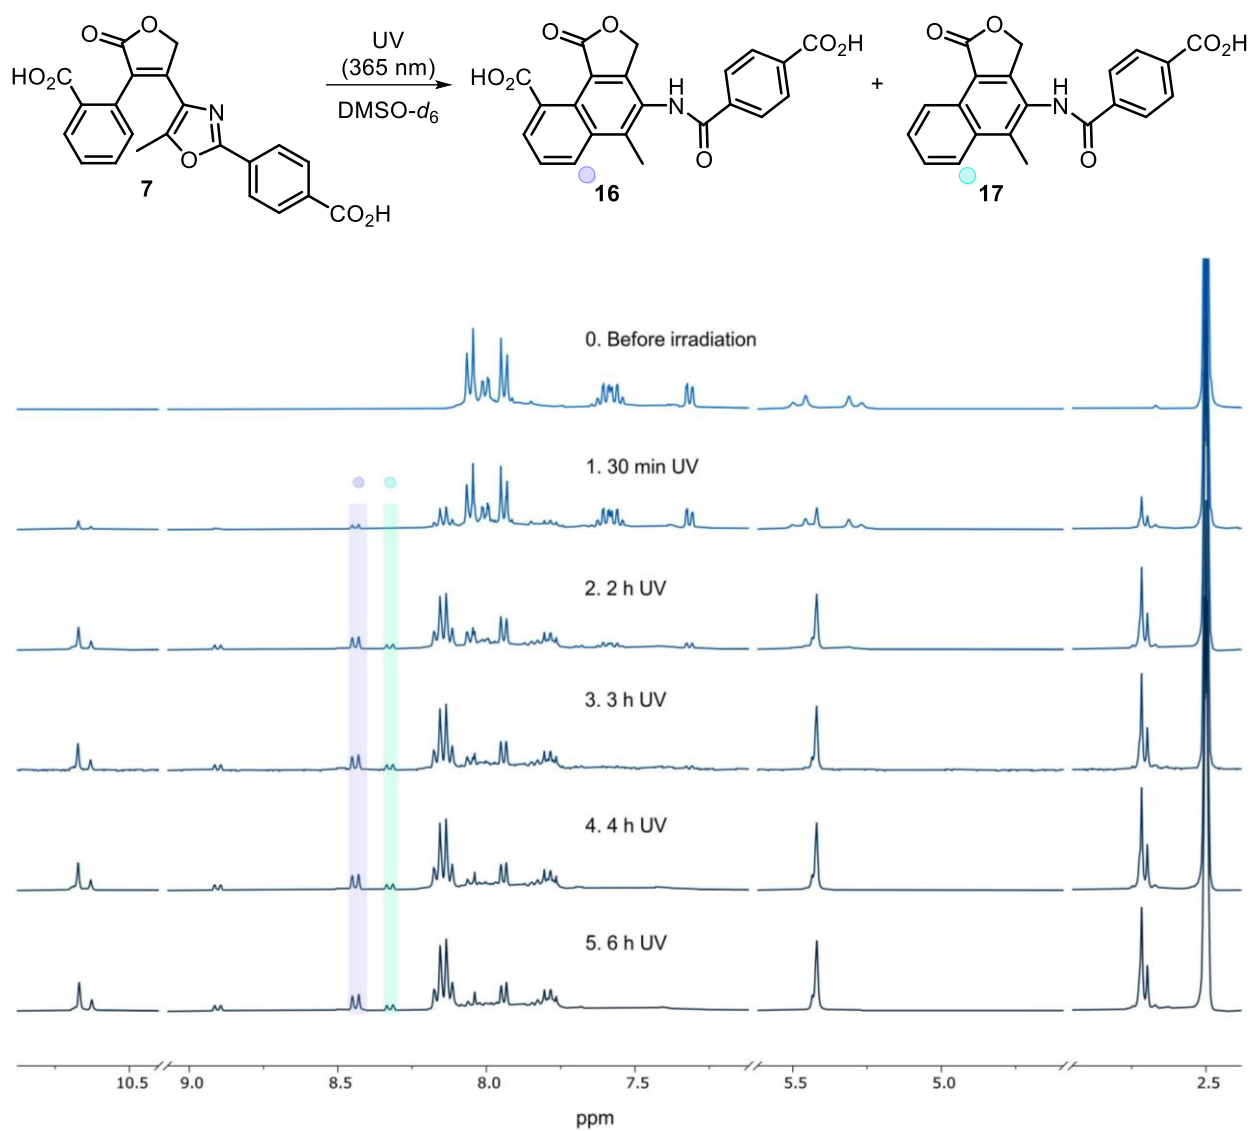

**Figure S3.** <sup>1</sup>H NMR monitoring of **7** irradiated by UV light (365 nm) in DMSO-*d*<sub>6</sub> over 6 h from top to bottom.

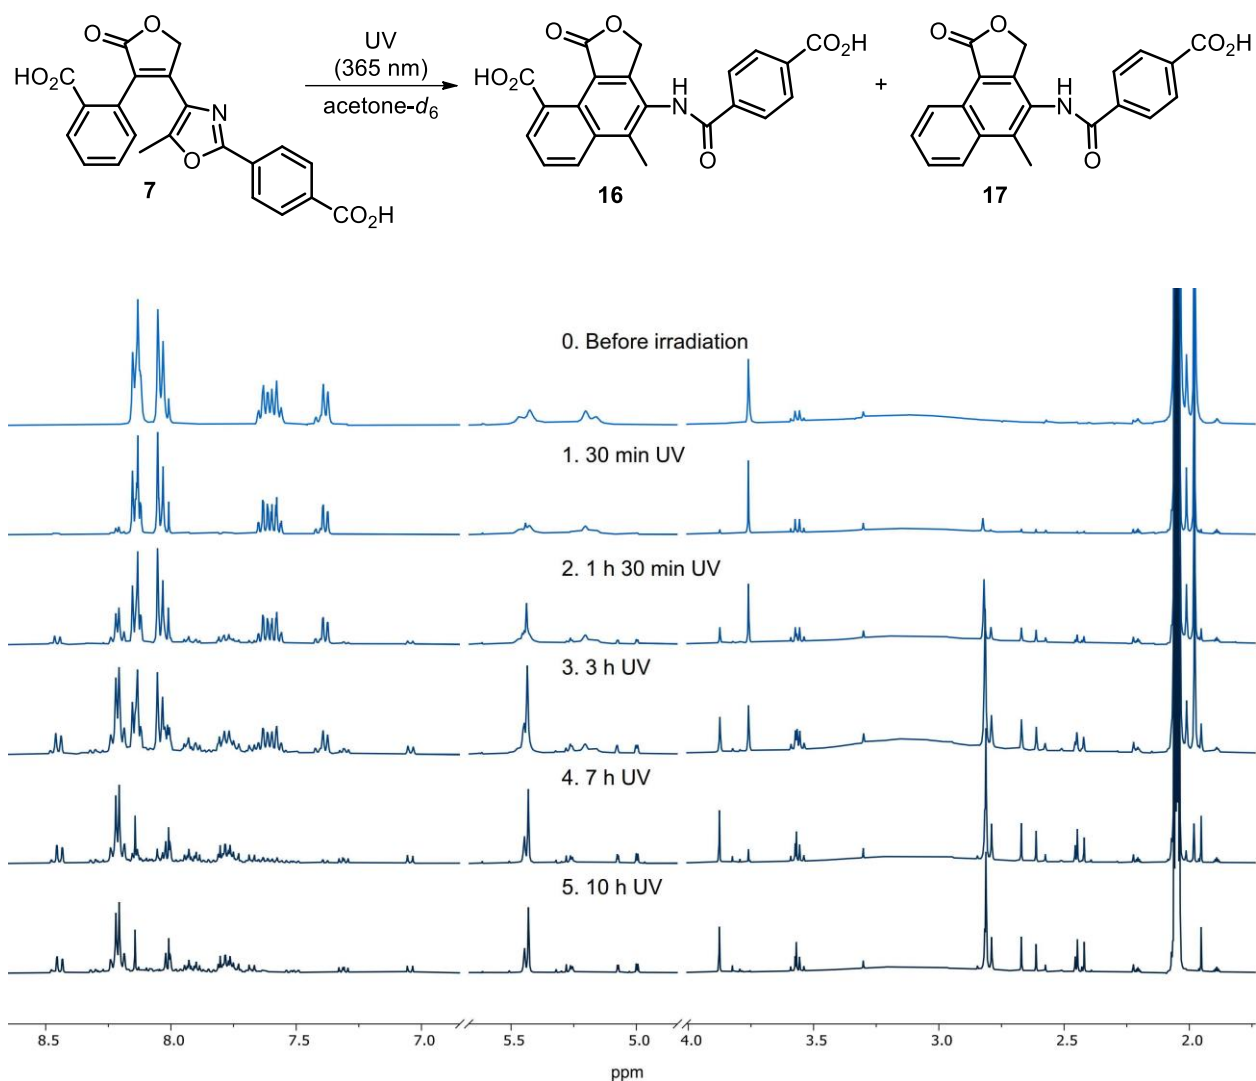

**Figure S4.**  $^1\text{H}$  NMR monitoring of **7** irradiated by UV light (365 nm) in acetone- $d_6$  over 10 h from top to bottom.

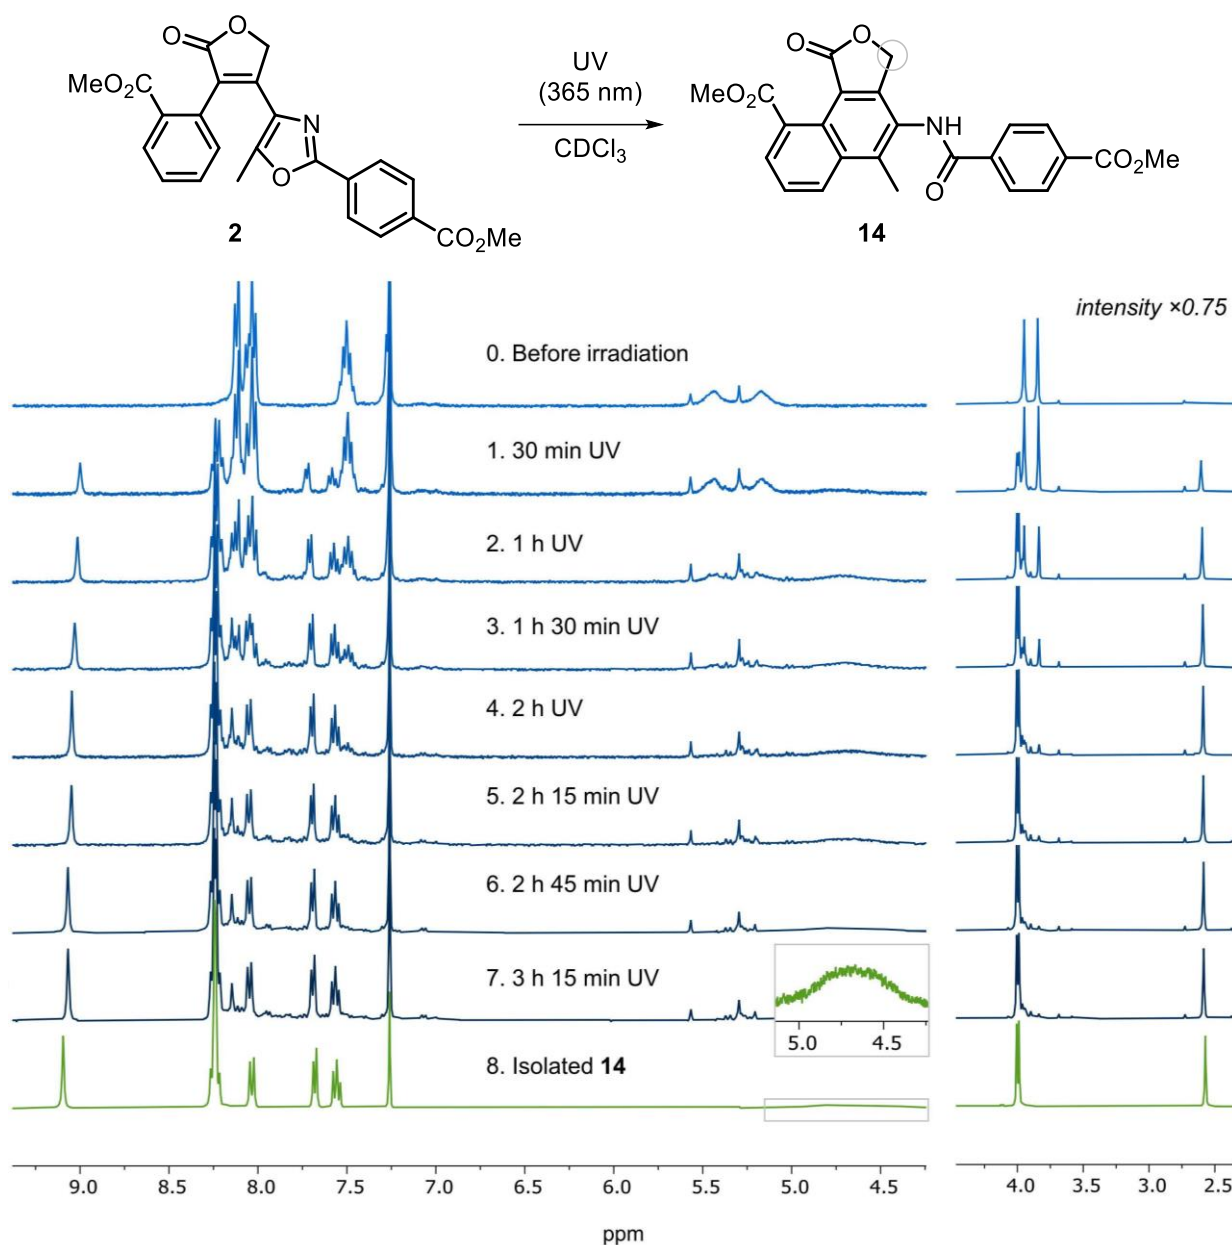

**Figure S5.** <sup>1</sup>H NMR monitoring of **2** irradiated by UV light (365 nm) in CDCl<sub>3</sub> over 3 h 15 min from top to bottom and the spectra of **14** for comparison. The broad signal of methylene protons is framed.



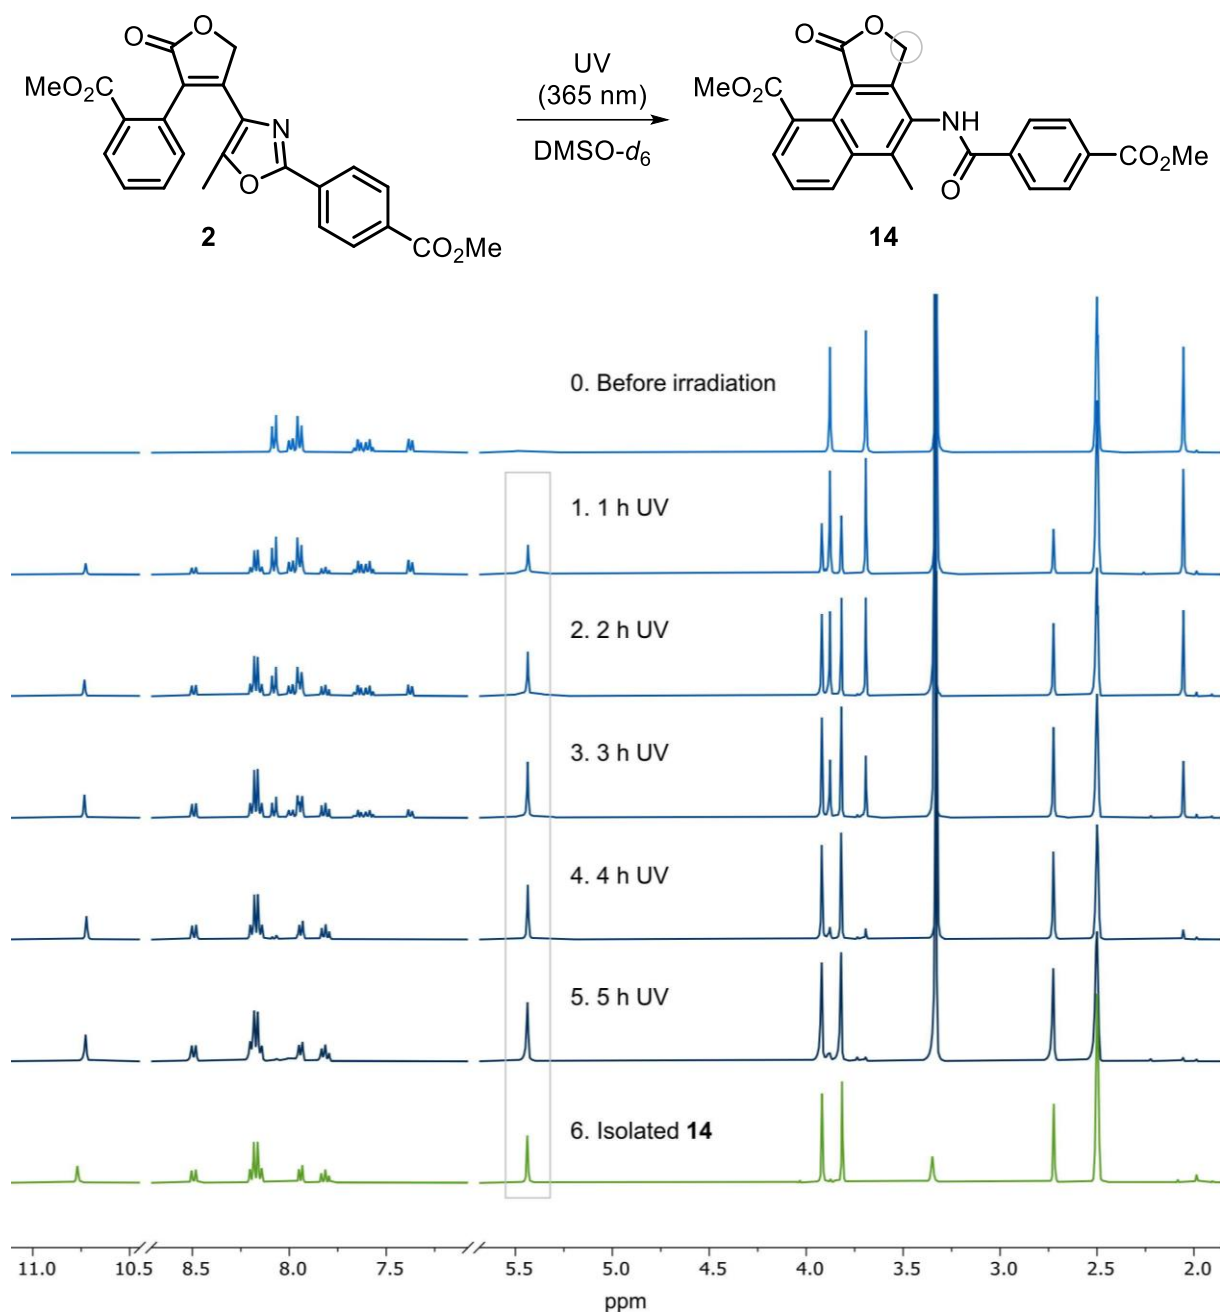

**Figure S6.** <sup>1</sup>H NMR monitoring of **2** irradiated by UV light (365 nm) in DMSO-*d*<sub>6</sub> over 5 h from top to bottom and the spectra of **14** for comparison. The signal of methylene protons is framed.

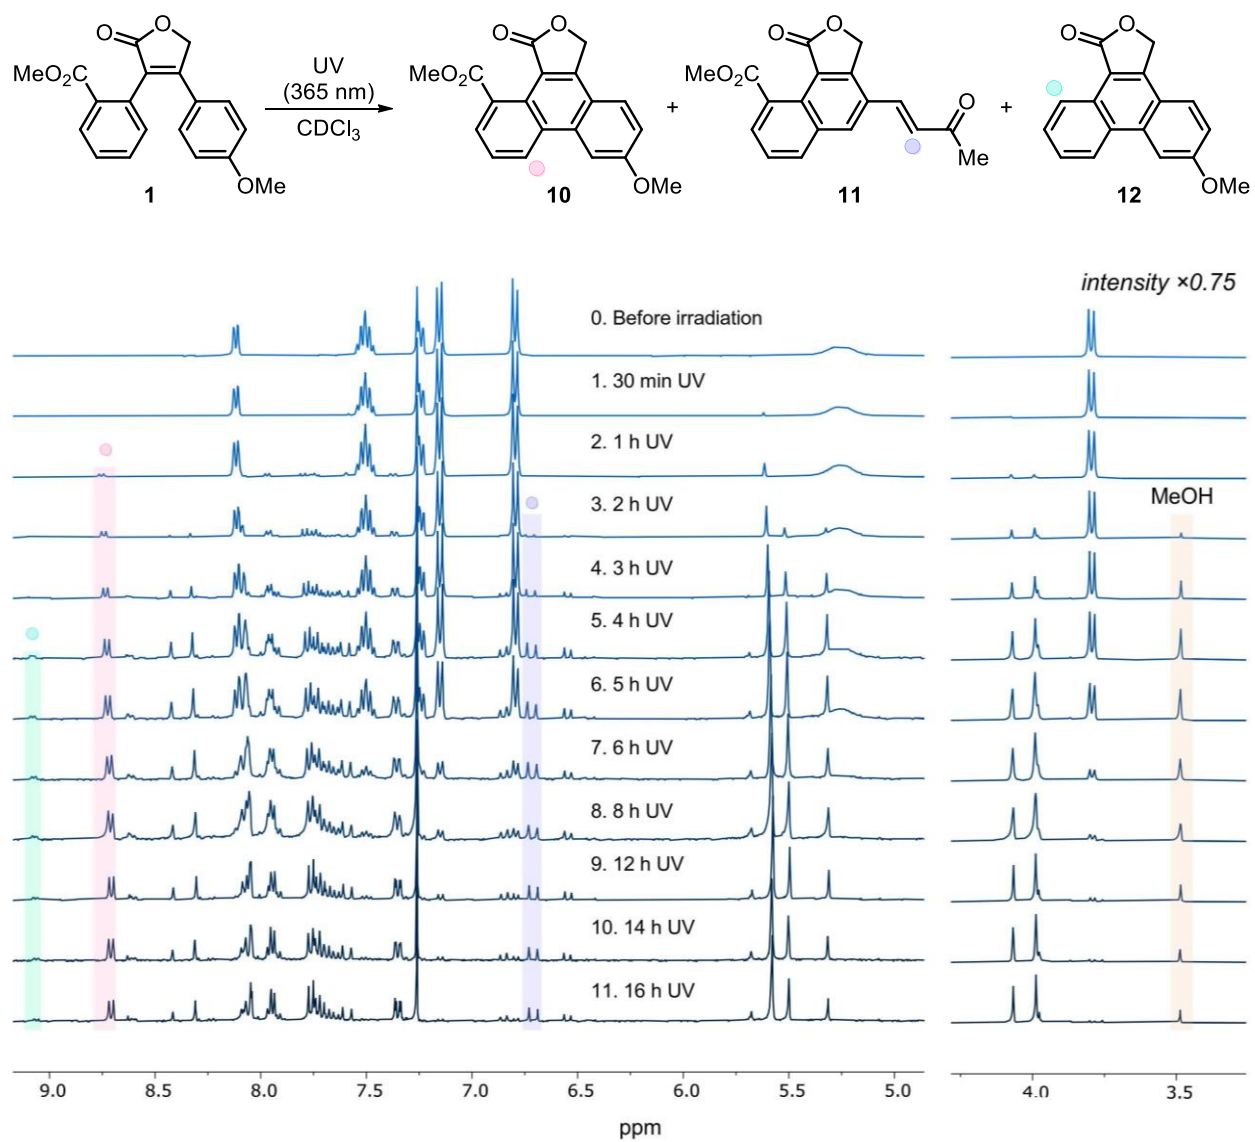

**Figure S7.** <sup>1</sup>H NMR monitoring of **1** irradiated by UV light (365 nm) in CDCl<sub>3</sub> over 16 h from top to bottom.

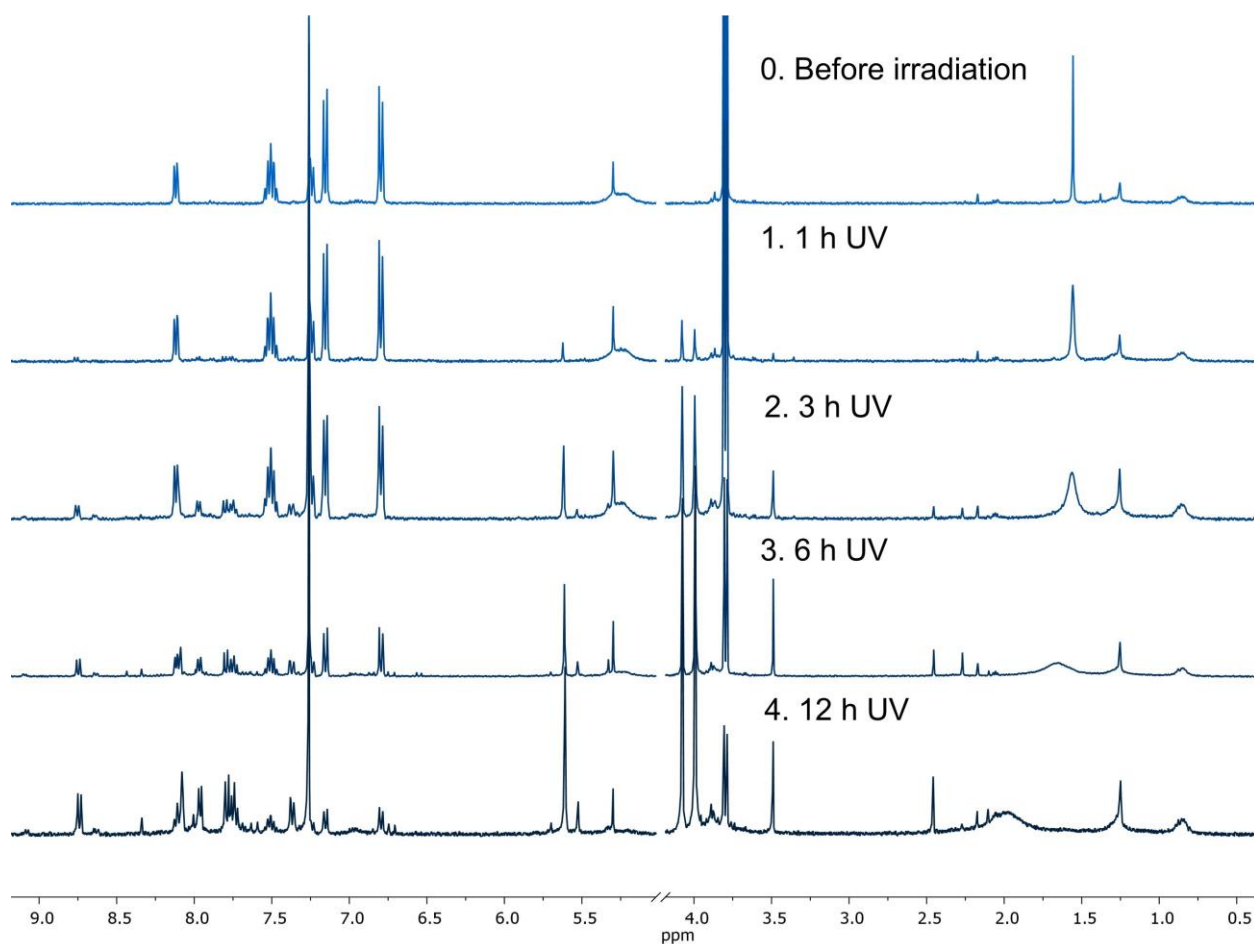

**Figure S8.**  $^1\text{H}$  NMR monitoring of **1** irradiated by UV light (365 nm) in  $\text{CDCl}_3$  over 12 h from top to bottom. The photolysis was performed in inert atmosphere.

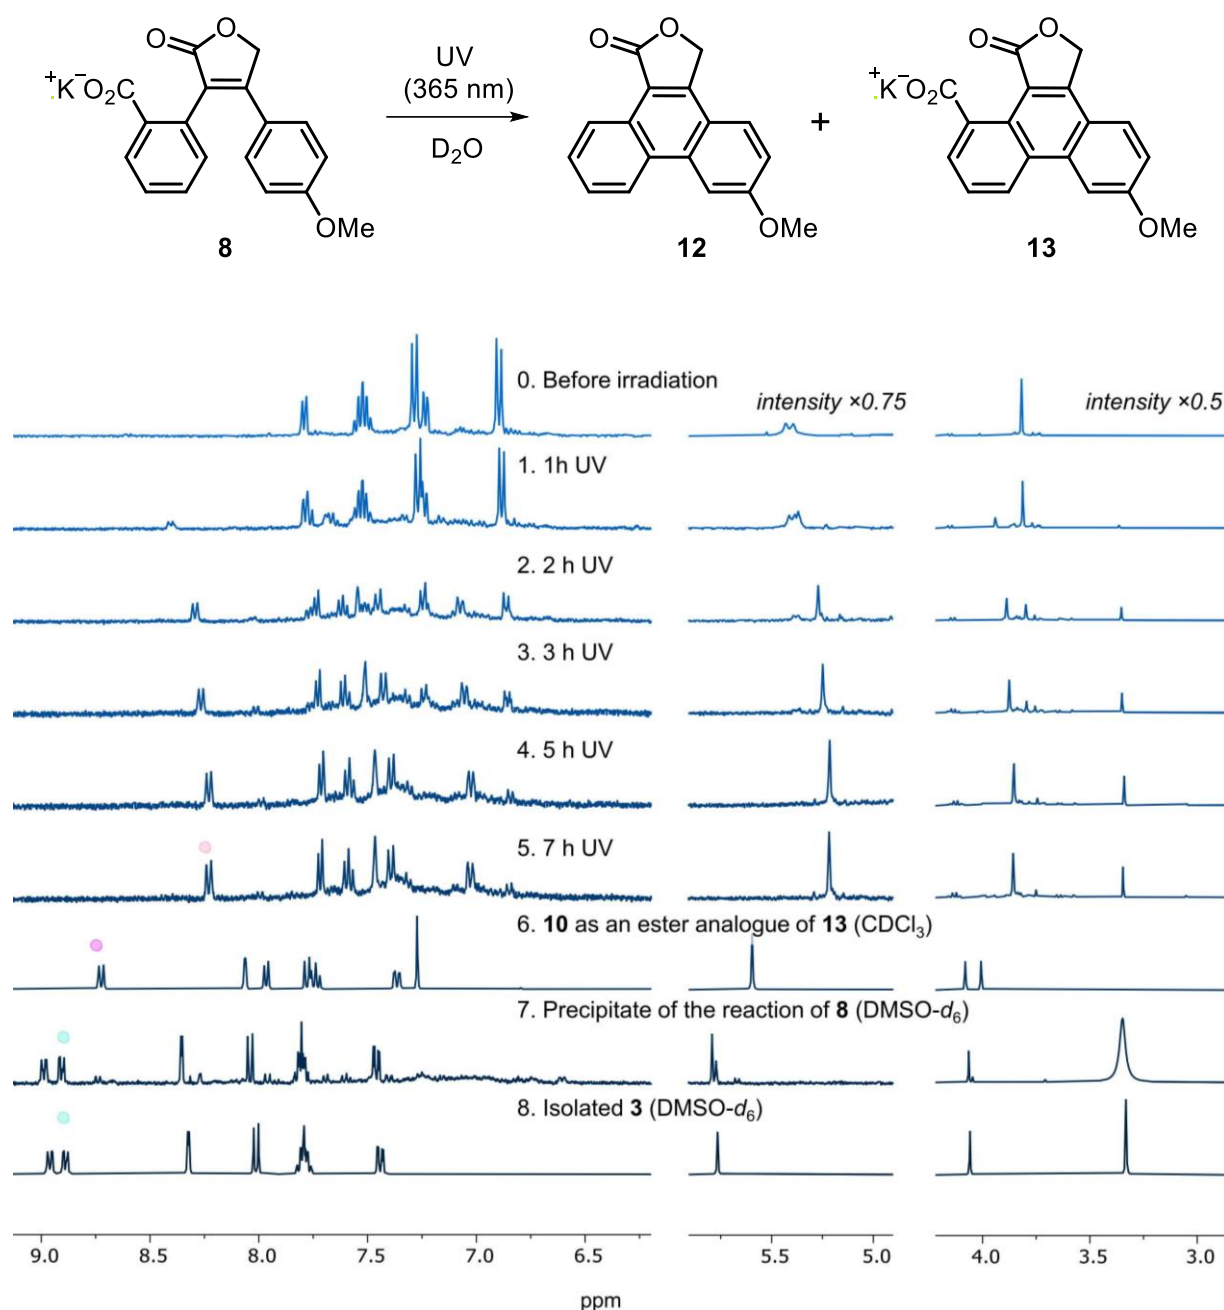

**Figure S9.** <sup>1</sup>H NMR monitoring of **8** irradiated by UV light (365 nm) in D<sub>2</sub>O over 7 h from top to bottom, showing formation of single **13**, spectrum of filtered precipitation of the reaction in DMSO-*d*<sub>6</sub> and the spectrum of **12** in DMSO-*d*<sub>6</sub> for comparison (both pink).

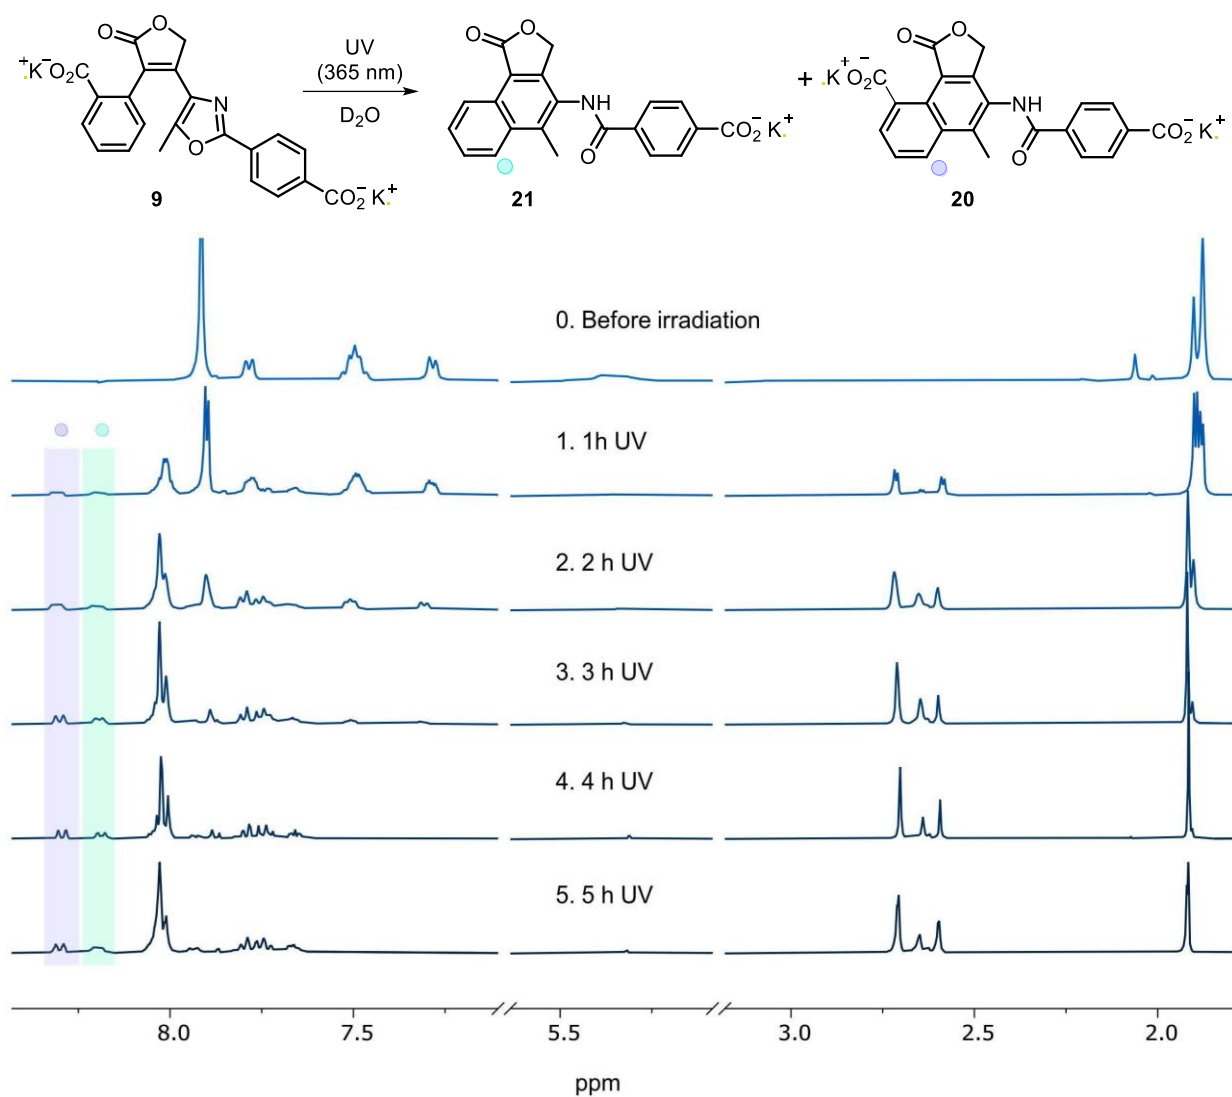

**Figure S10.** <sup>1</sup>H NMR monitoring of **9** irradiated by UV light (365 nm) in D<sub>2</sub>O over 5 h from top to bottom.

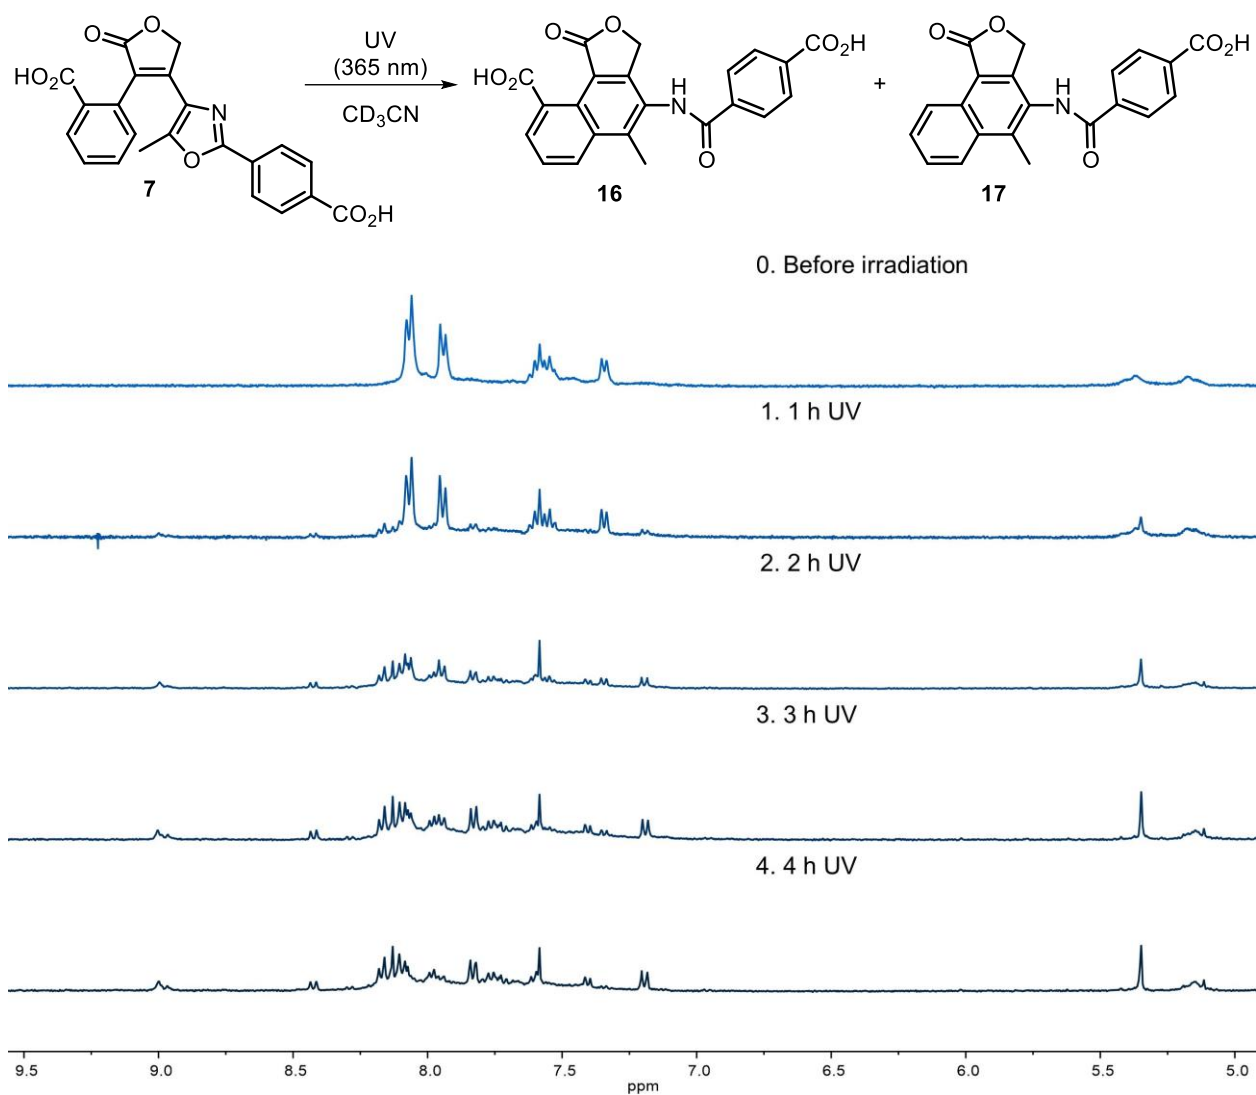

**Figure S12.** <sup>1</sup>H NMR monitoring of **7** irradiated by UV light (365 nm) in MeCN-d<sub>3</sub> over 6 h from top to bottom.

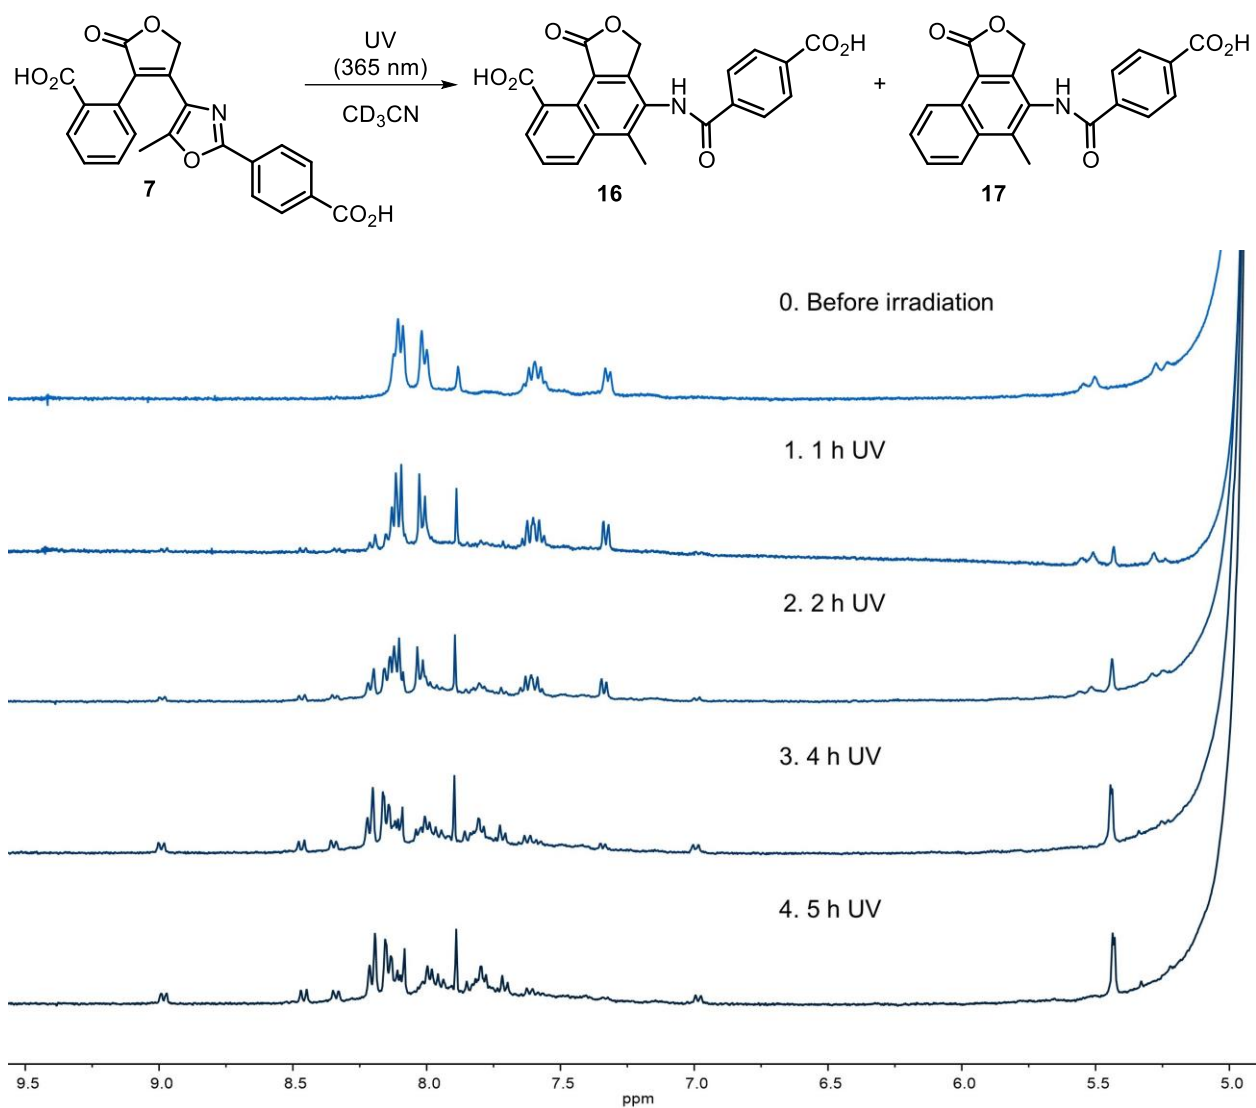

**Figure S13.** <sup>1</sup>H NMR monitoring of **7** irradiated by UV light (365 nm) in MeOD-d<sub>4</sub> over 6 h from top to bottom.

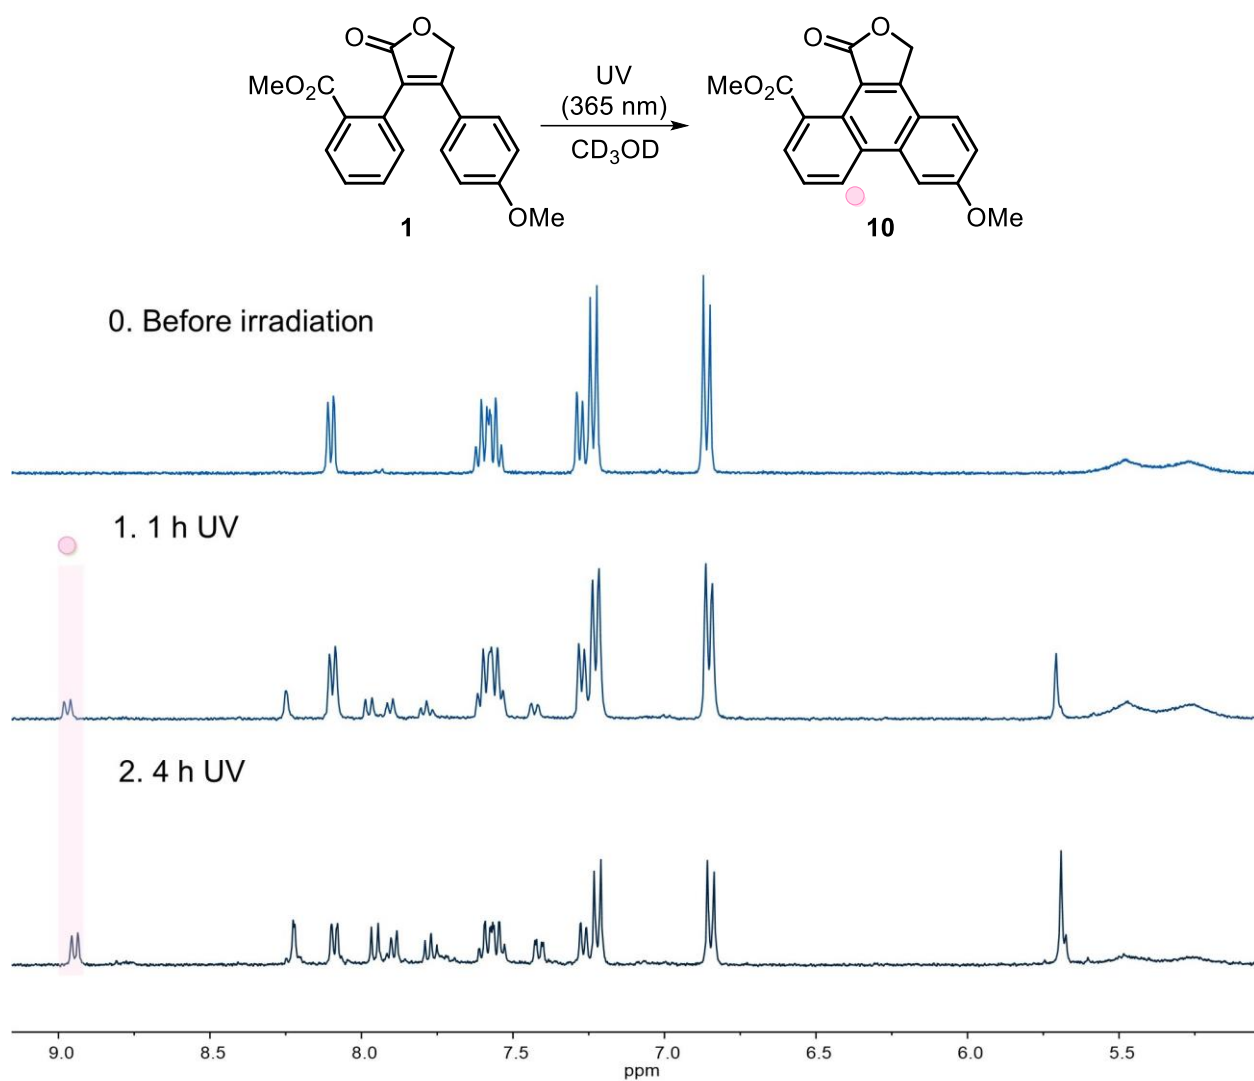

**Figure S14.** <sup>1</sup>H NMR monitoring of **1** irradiated by UV light (365 nm) in MeOD-d<sub>4</sub>.



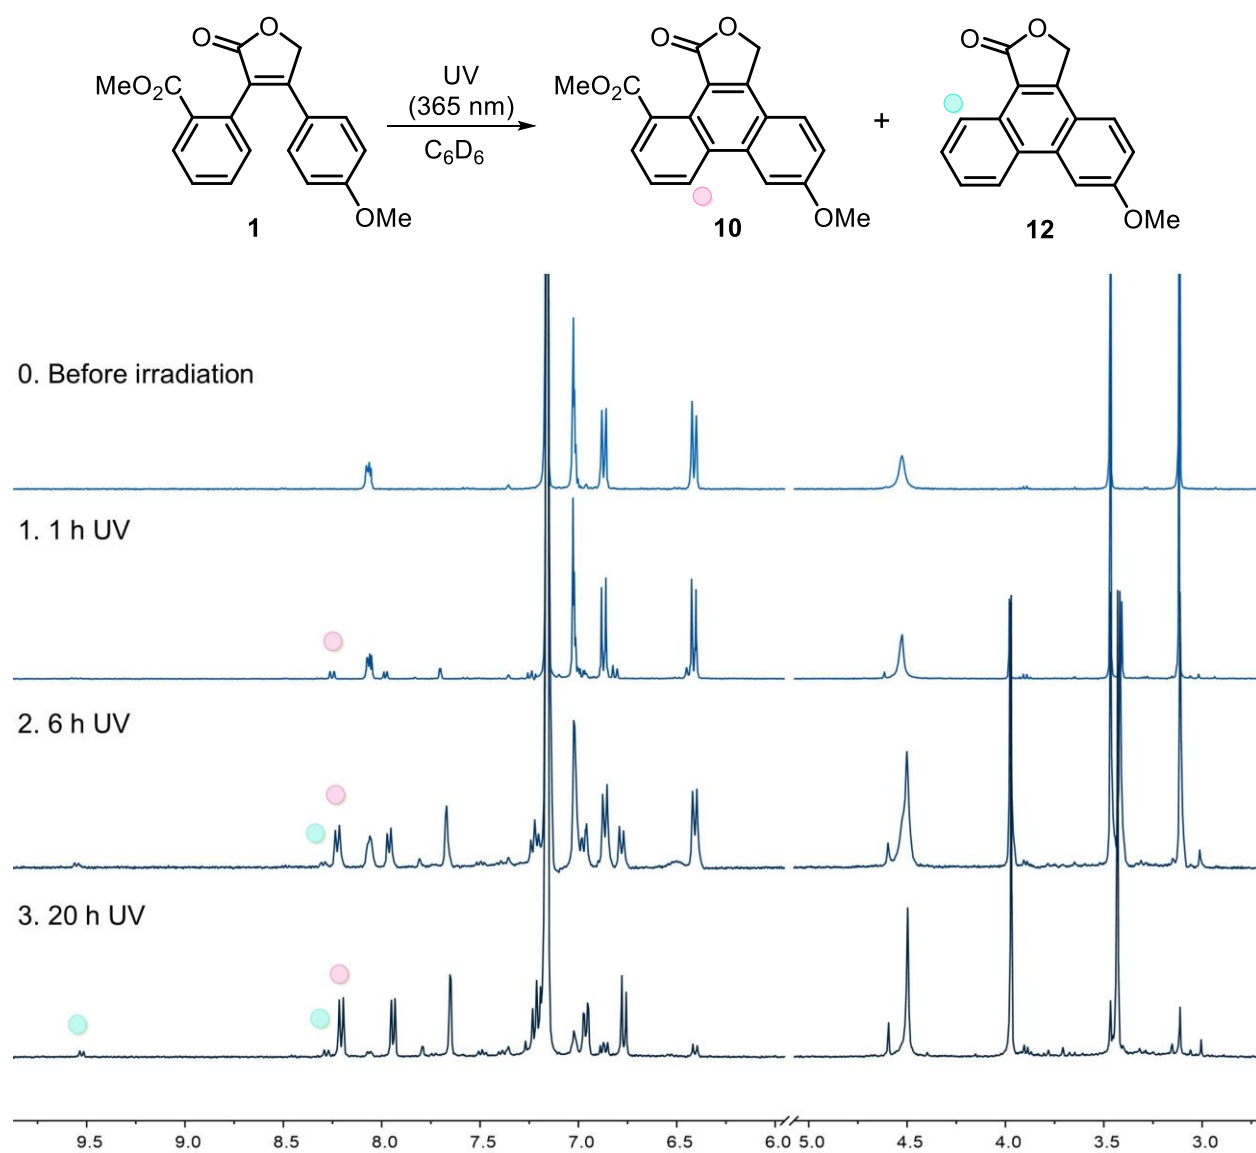

**Figure S15.**  $^1H$  NMR monitoring of **1** irradiated by UV light (365 nm) in  $C_6D_6$ .

## II.2 VT-NMR for 2

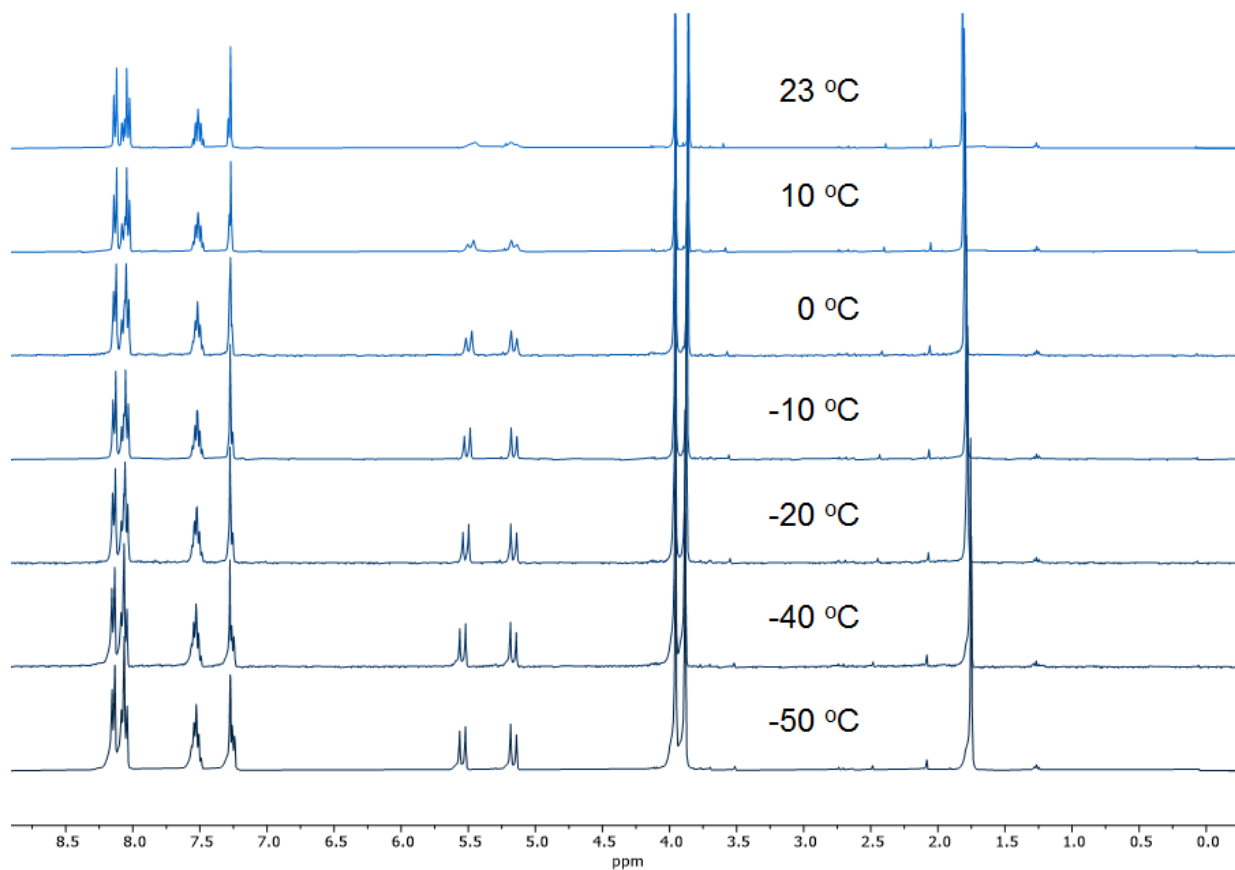

**Figure S16.** Changes of  $^1\text{H}$  NMR spectra of **2** in  $\text{CDCl}_3$  with decreasing temperature (full spectra).

### II.3 2D NOESY for 4

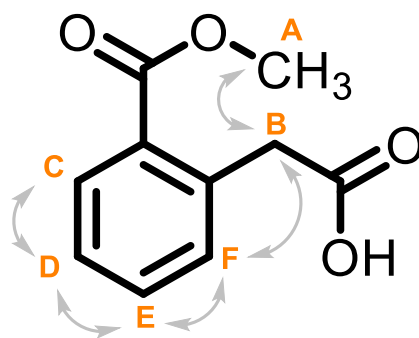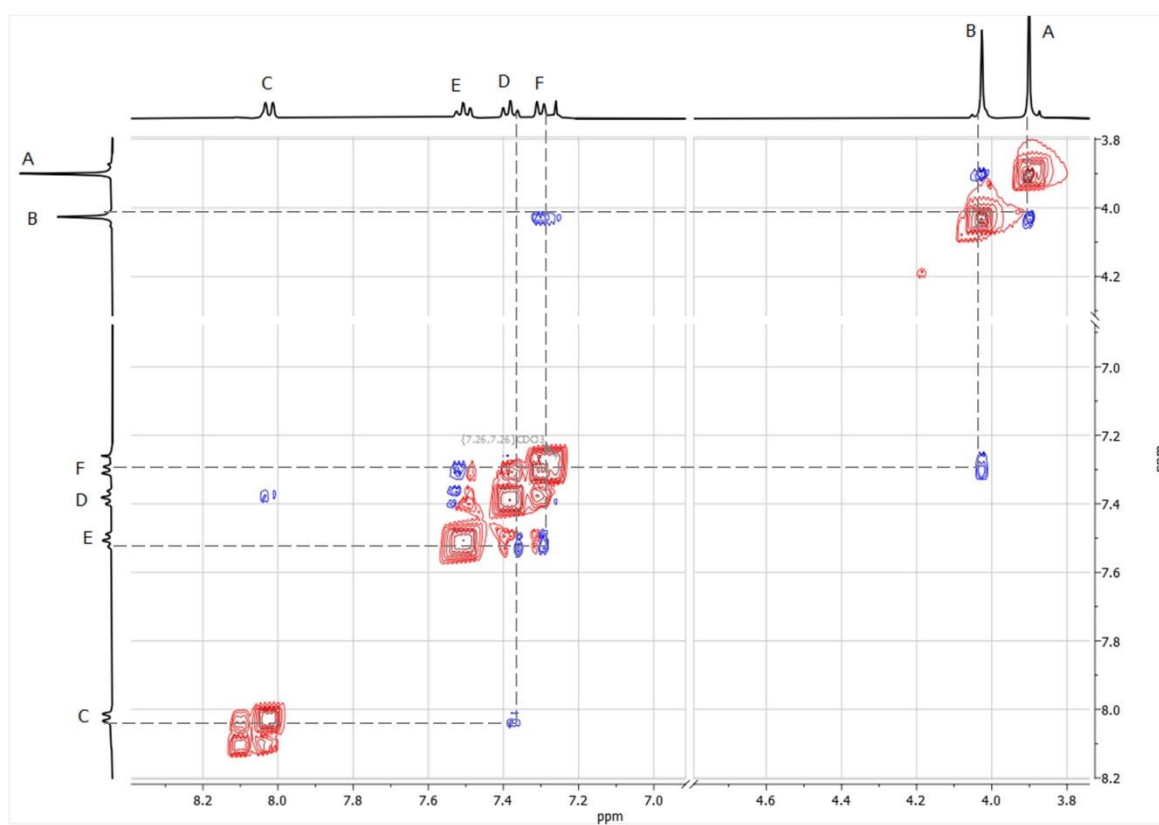

**Table S1.** Assignment of  $^1\text{H}$  signals for 4

|   | $^1\text{H}$               | NOESY |
|---|----------------------------|-------|
| A | 3.90 (s, 3H)               | B     |
| B | 4.03 (s, 2H)               | A, F  |
| C | 8.02 (d, $J = 6.2$ Hz, 1H) | D     |
| D | 7.38 (t, $J = 7.6$ Hz, 1H) | E, C  |
| E | 7.51 (t, $J = 7.6$ Hz, 1H) | D, F  |
| F | 7.30 (d, $J = 7.6$ Hz, 1H) | B, E  |

### III. Absorption spectroscopy

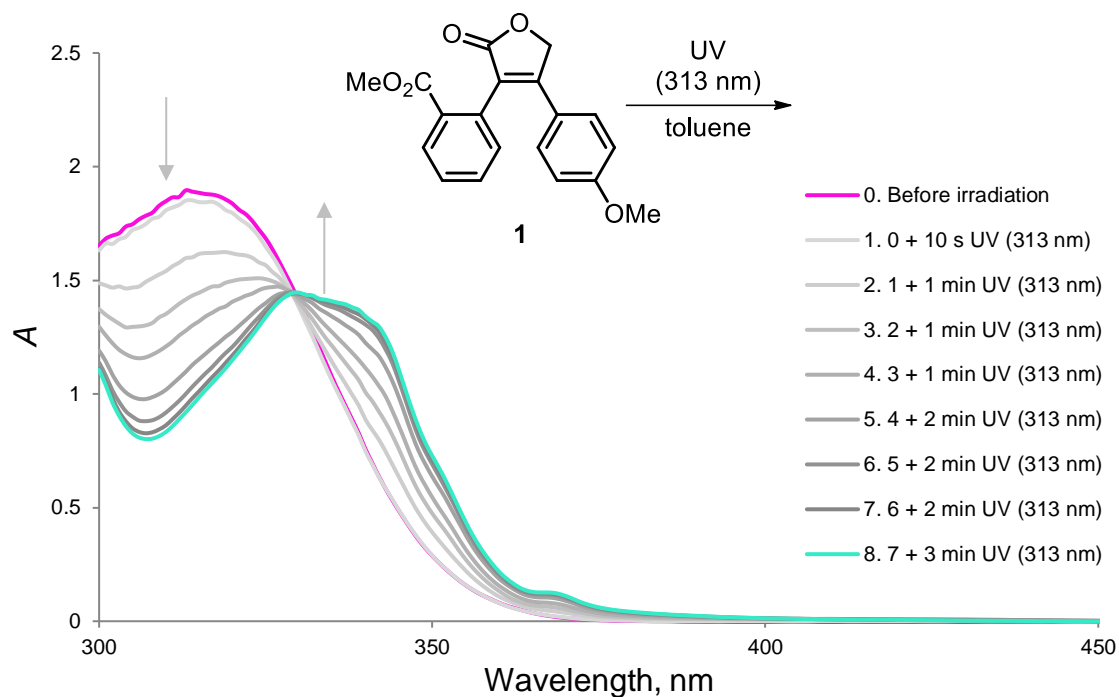

**Figure S17.** Spectral changes of **1** in toluene ( $c \approx 10^{-4}$  M) upon irradiation with UV light ( $\lambda_{\text{max}} = 313$  nm, 8 W).

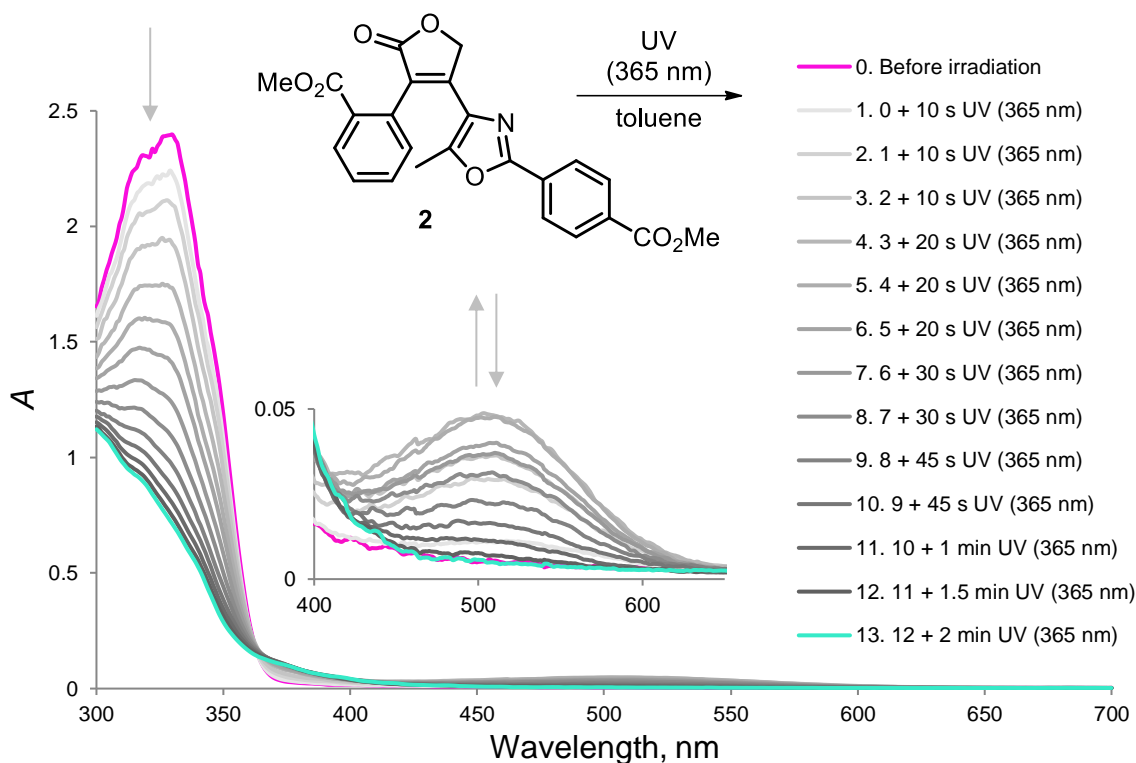

**Figure S18.** Spectral changes of **2** in toluene ( $c \approx 10^{-4}$  M) upon irradiation with UV light ( $\lambda_{\text{max}} = 365$  nm, 8 W).

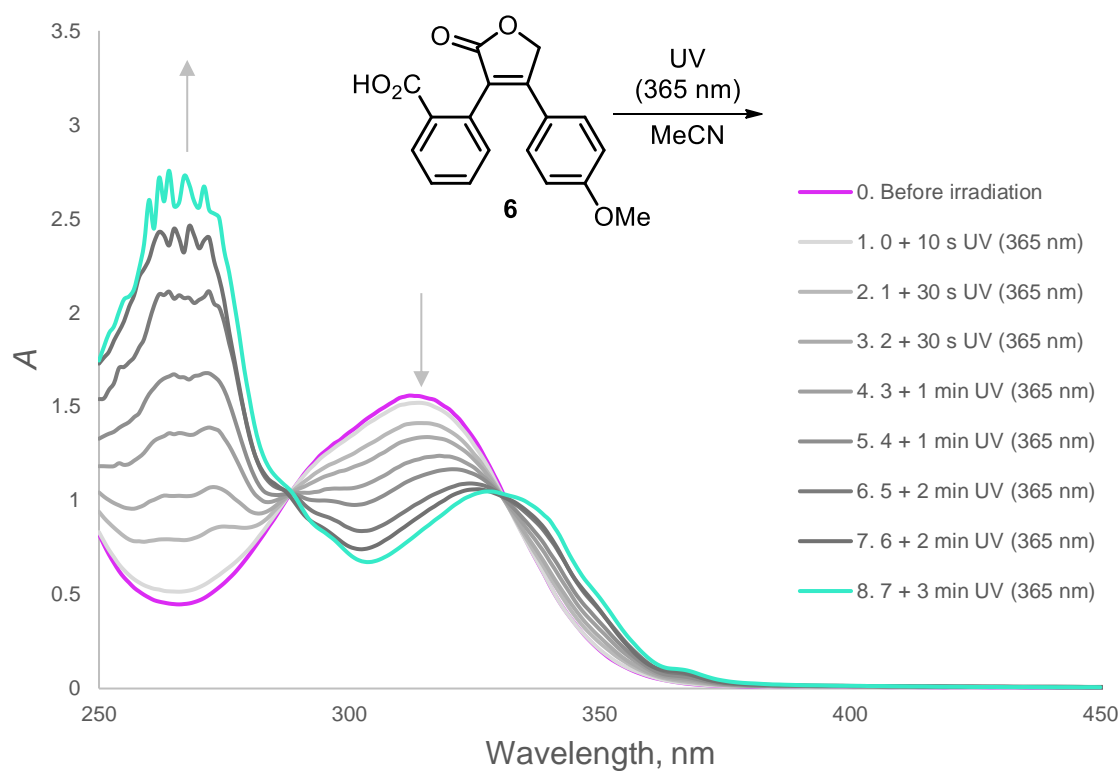

**Figure S19.** Spectral changes of **6** in acetonitrile ( $c \approx 10^{-4}$  M) upon irradiation with UV light ( $\lambda_{\text{max}} = 365$  nm, 8 W).

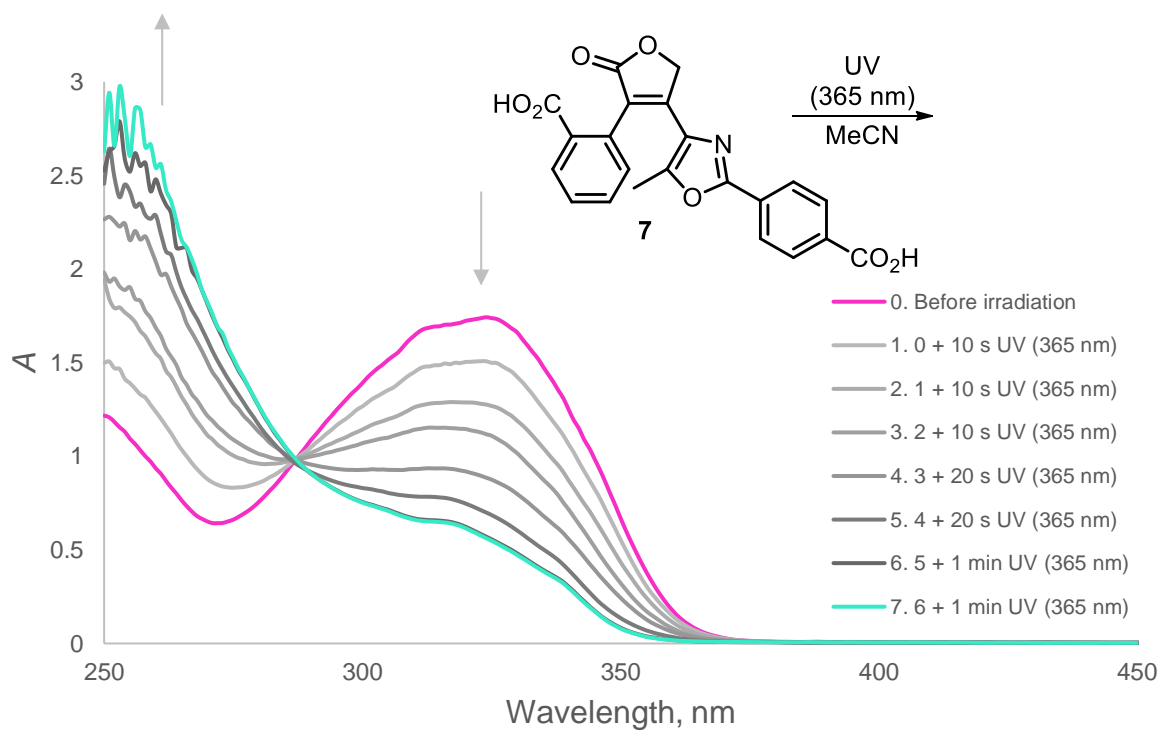

**Figure S20.** Spectral changes of **7** in acetonitrile ( $c \approx 10^{-4}$  M) upon irradiation with UV light ( $\lambda_{\text{max}} = 365$  nm, 8 W).

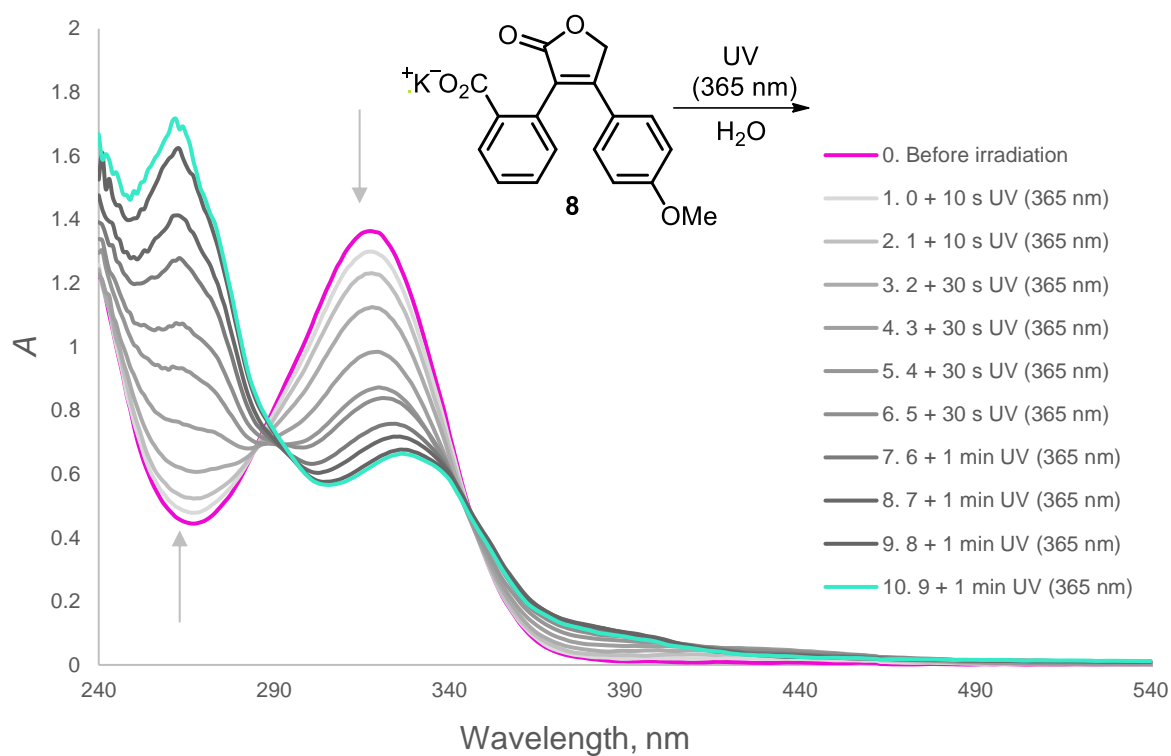

**Figure S21.** Spectral changes of **8** in water (buffer pH = 7,  $c \approx 10^{-4}$  M) upon irradiation with UV light ( $\lambda_{\text{max}} = 365$  nm, 8 W).

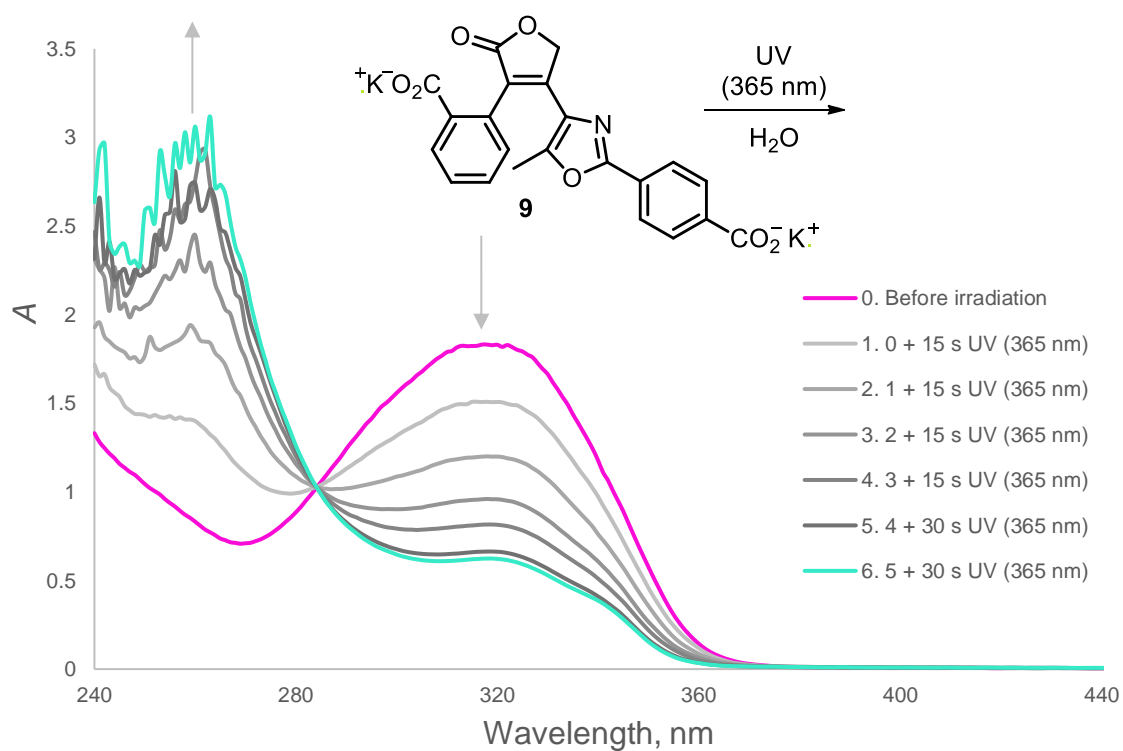

**Figure S22.** Spectral changes of **9** in water (buffer pH = 7,  $c \approx 10^{-4}$  M) upon irradiation with UV light ( $\lambda_{\text{max}} = 365$  nm, 8 W).

#### IV. X-ray crystallography

The X-ray diffraction experiments for compounds **1** and **2** were carried out using a SMART APEX2 CCD diffractometer ( $\lambda(\text{Mo-K}\alpha) = 0.71073 \text{ \AA}$ , graphite monochromator,  $\omega$ -scans) at 120 K. Collected data were processed by the SAINT and SADABS programs incorporated into the APEX2 program package. Intensities of reflections for **6** crystal were collected at 100 K at “Belok/XSA” beamline of the Kurchatov Synchrotron Radiation Source.<sup>[2,3]</sup> Diffraction pattern was collected using 1-axis MarDTB goniometer equipped with Rayonix SX165 CCD 2D positional sensitive CCD detector ( $\lambda = 0.745 \text{ \AA}$ ,  $\phi$ -scanning in  $1.0^\circ$  steps) in direct geometry with the detector plane perpendicular to the beam. The data were indexed and integrated using the XDS<sup>4</sup> software suite.

Crystal structures were solved and refined using Olex2<sup>5</sup> and ShelXL<sup>6</sup> packages. All nonhydrogen atoms were refined in anisotropic approximation against  $F^2(\text{hkl})$ . Riding hydrogens were refined in isotropic approximation.

CCDC 2467398 (**1**), 2467397 (**2**), 2467399 (**6**) contain the supplementary crystallographic data, which can be obtained free of charge at [www.ccdc.cam.ac.uk/structures](http://www.ccdc.cam.ac.uk/structures) or from the Cambridge Crystallographic Data Centre, 12 Union Road, Cambridge CB2 1EZ, UK; fax: +44-1223-336-033; e-mail: [deposit@ccdc.cam.ac.uk](mailto:deposit@ccdc.cam.ac.uk).

---

<sup>2</sup> V. Lazarenko, P. Dorovatovskii, Y. Zubavichus, A. Burlov, Y. Koshchienko, V. Vlasenko and V. Khrustalev, *Crystals*, 2017, **7**, 325.

<sup>3</sup> R. D. Svetogorov, P. V. Dorovatovskii and V. A. Lazarenko, *Cryst. Res. Technol.*, , DOI:10.1002/crat.201900184.

<sup>4</sup> W. Kabsch, *Acta Crystallogr. Sect. D Biol. Crystallogr.*, 2010, **66**, 125–132.

<sup>5</sup> O. V. Dolomanov, L. J. Bourhis, R. J. Gildea, J. A. K. Howard and H. Puschmann, *J. Appl. Crystallogr.*, 2009, **42**, 339–341.

<sup>6</sup> G. M. Sheldrick, *Acta Crystallogr. Sect. A Found. Crystallogr.*, 2008, **64**, 112–122.

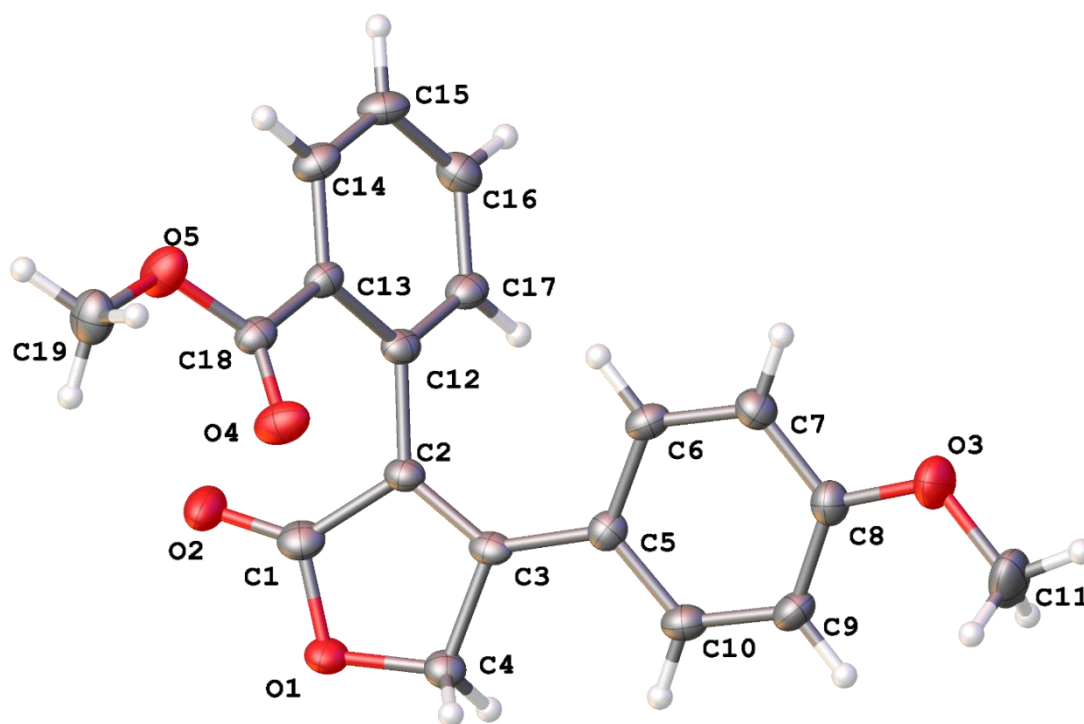

**Figure S23.** Molecular view and atomic numbering of **1** (ellipsoid contours of probability levels are 50%). Color code: Color code: C, gray; O, red; H white.

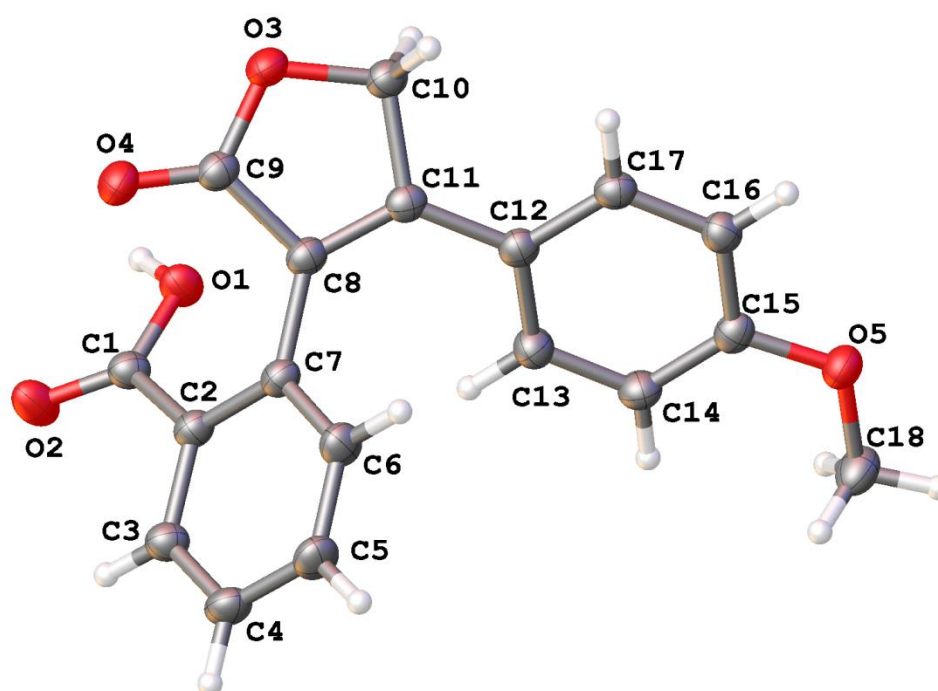

**Figure S24.** Molecular view and atomic numbering of **6** (ellipsoid contours of probability levels are 50%). Color code: Color code: C, gray; O, red; H white.



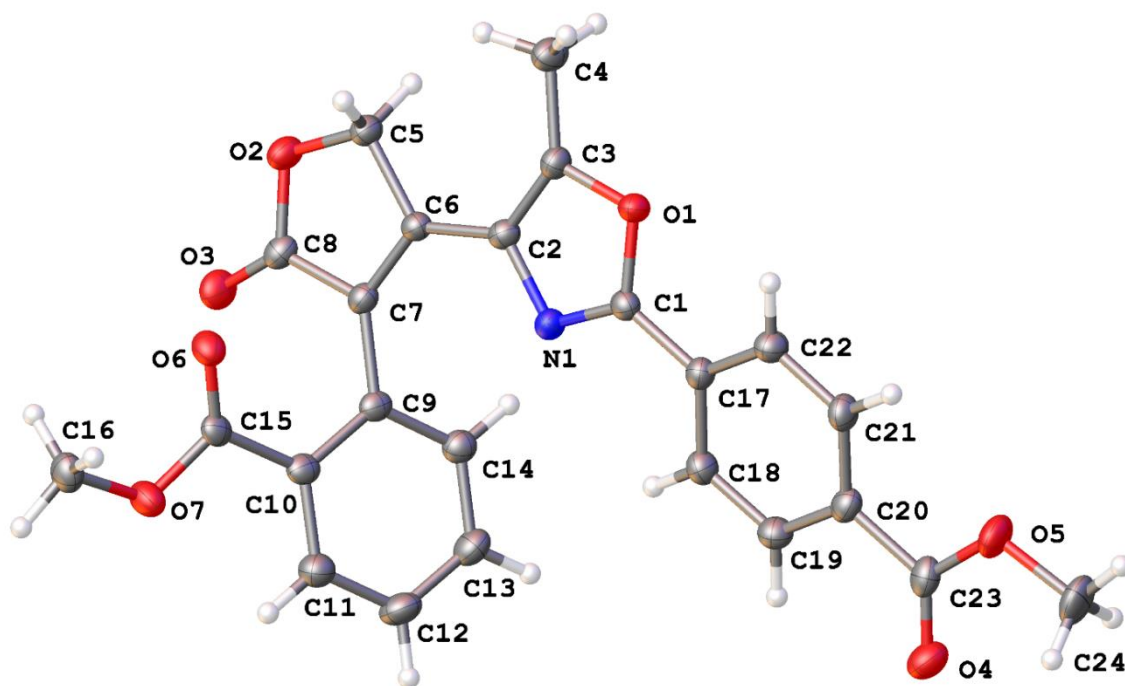

**Figure S25.** Molecular view and atomic numbering of **2** (ellipsoid contours of probability levels are 50%). Color code: C, gray; O, red; N, blue; H white.

**Table S2.** Crystal data and structure refinement for **1**, **2** and **6**.

|                                             | <b>1</b>                                                      | <b>2</b>                                                      | <b>6</b>                                                      |
|---------------------------------------------|---------------------------------------------------------------|---------------------------------------------------------------|---------------------------------------------------------------|
| CCDC No                                     | 2467398                                                       | 2467397                                                       | 2467399                                                       |
| No                                          | Me-148ab                                                      | Me-95                                                         | Sn-14                                                         |
| Formula                                     | C <sub>19</sub> H <sub>16</sub> O <sub>5</sub>                | C <sub>24</sub> H <sub>19</sub> NO <sub>7</sub>               | C <sub>18</sub> H <sub>14</sub> O <sub>5</sub>                |
| F <sub>w</sub>                              | 324.32                                                        | 433.40                                                        | 310.309                                                       |
| T, K                                        | 120                                                           | 120                                                           | 100                                                           |
| Crystal system                              | monoclinic                                                    | orthorhombic                                                  | triclinic                                                     |
| Space group                                 | C2/c                                                          | Pna2 <sub>1</sub>                                             | P-1                                                           |
| a/Å                                         | 23.642(8)                                                     | 7.6947(5)                                                     | 7.6200(15)                                                    |
| b/Å                                         | 12.087(4)                                                     | 17.4535(12)                                                   | 7.8600(16)                                                    |
| c/Å                                         | 11.817(4)                                                     | 14.9070(10)                                                   | 13.160(3)                                                     |
| α/°                                         | 90                                                            | 90                                                            | 104.32(3)                                                     |
| β/°                                         | 112.960(9)                                                    | 90                                                            | 95.25(3)                                                      |
| γ/°                                         | 90                                                            | 90                                                            | 101.42(3)                                                     |
| Volume/Å <sup>3</sup>                       | 3109.2(17)                                                    | 2002.0(2)                                                     | 740.4(3)                                                      |
| Z                                           | 8                                                             | 4                                                             | 2                                                             |
| ρ <sub>calc</sub> /g/cm <sup>3</sup>        | 1.386                                                         | 1.438                                                         | 1.392                                                         |
| μ/mm <sup>-1</sup>                          | 0.101                                                         | 0.107                                                         | 0.116                                                         |
| F(000)                                      | 1360.0                                                        | 904.0                                                         | 324.2                                                         |
| Crystal size/mm <sup>3</sup>                | 0.24 × 0.04 × 0.03                                            | 0.22 × 0.16 × 0.11                                            | 0.15 × 0.12 × 0.1                                             |
| Radiation                                   | MoKα (λ = 0.71073)                                            | MoKα (λ = 0.71073)                                            | synchrotron (λ = 0.75270)                                     |
| 2θ range for data collection/°              | 3.742 to 61.18                                                | 3.594 to 61.172                                               | 3.42 to 61.78                                                 |
| Index ranges                                | -21 ≤ h ≤ 33, -17 ≤ k ≤ 16, -16 ≤ l ≤ 16                      | -10 ≤ h ≤ 9, -24 ≤ k ≤ 24, -21 ≤ l ≤ 21                       | -10 ≤ h ≤ 10, -10 ≤ k ≤ 9, -17 ≤ l ≤ 17                       |
| Reflections collected                       | 13845                                                         | 21640                                                         | 12597                                                         |
| Independent reflections                     | 4738 [R <sub>int</sub> = 0.1256, R <sub>sigma</sub> = 0.2150] | 6045 [R <sub>int</sub> = 0.0555, R <sub>sigma</sub> = 0.0950] | 3894 [R <sub>int</sub> = 0.0402, R <sub>sigma</sub> = 0.0408] |
| Data / restraints/ parameters               | 4738/0/221                                                    | 6045/1/292                                                    | 3894/0/210                                                    |
| GOF <sup>2</sup>                            | 1.009                                                         | 0.997                                                         | 1.025                                                         |
| Final R indexes [I>=2σ (I)]                 | R <sub>1</sub> = 0.0882, wR <sub>2</sub> = 0.1727             | R <sub>1</sub> = 0.0460, wR <sub>2</sub> = 0.0870             | R <sub>1</sub> = 0.0420, wR <sub>2</sub> = 0.1098             |
| Final R indexes [all data]                  | R <sub>1</sub> = 0.2247, wR <sub>2</sub> = 0.2201             | R <sub>1</sub> = 0.0822, wR <sub>2</sub> = 0.0972             | R <sub>1</sub> = 0.0500, wR <sub>2</sub> = 0.1168             |
| Largest diff. peak/hole / e Å <sup>-3</sup> | 0.32/-0.51                                                    | 0.23/-0.20                                                    | 0.36/-0.26                                                    |
| Flack parameter                             |                                                               | -0.3(6)                                                       |                                                               |

**Table S3.** Bond Lengths for **1**.

| Atom | Atom | Length/Å | Atom | Atom | Length/Å |
|------|------|----------|------|------|----------|
| O1   | C1   | 1.373(4) | C5   | C6   | 1.419(4) |
| O1   | C4   | 1.433(4) | C5   | C10  | 1.392(4) |
| C1   | O2   | 1.202(4) | C6   | C7   | 1.370(4) |
| C1   | C2   | 1.461(5) | C7   | C8   | 1.389(4) |
| C2   | C3   | 1.339(4) | C8   | C9   | 1.392(5) |
| C2   | C12  | 1.489(4) | C9   | C10  | 1.377(5) |
| O3   | C8   | 1.363(4) | C12  | C13  | 1.419(4) |
| O3   | C11  | 1.429(4) | C12  | C17  | 1.391(4) |
| C3   | C4   | 1.515(4) | C13  | C14  | 1.382(4) |
| C3   | C5   | 1.458(4) | C13  | C18  | 1.475(4) |
| O4   | C18  | 1.207(4) | C14  | C15  | 1.378(5) |
| O5   | C18  | 1.341(4) | C15  | C16  | 1.392(5) |
| O5   | C19  | 1.449(4) | C16  | C17  | 1.382(4) |

**Table S4.** Bond Angles for **1**.

| Atom | Atom | Atom | Angle/°  | Atom | Atom | Atom | Angle/°  |
|------|------|------|----------|------|------|------|----------|
| C1   | O1   | C4   | 108.4(2) | O3   | C8   | C7   | 116.0(3) |
| O1   | C1   | C2   | 109.1(3) | O3   | C8   | C9   | 124.0(3) |
| O2   | C1   | O1   | 120.3(3) | C7   | C8   | C9   | 120.0(3) |
| O2   | C1   | C2   | 130.6(3) | C10  | C9   | C8   | 118.9(3) |
| C1   | C2   | C12  | 118.9(3) | C9   | C10  | C5   | 122.9(3) |
| C3   | C2   | C1   | 109.1(3) | C13  | C12  | C2   | 122.5(3) |
| C3   | C2   | C12  | 131.9(3) | C17  | C12  | C2   | 118.9(3) |
| C8   | O3   | C11  | 118.0(3) | C17  | C12  | C13  | 118.3(3) |
| C2   | C3   | C4   | 107.5(3) | C12  | C13  | C18  | 119.8(3) |
| C2   | C3   | C5   | 132.3(3) | C14  | C13  | C12  | 119.3(3) |
| C5   | C3   | C4   | 120.0(3) | C14  | C13  | C18  | 120.9(3) |
| O1   | C4   | C3   | 105.7(3) | C15  | C14  | C13  | 121.8(3) |
| C18  | O5   | C19  | 116.3(3) | C14  | C15  | C16  | 119.3(3) |
| C6   | C5   | C3   | 122.3(3) | C17  | C16  | C15  | 119.8(3) |
| C10  | C5   | C3   | 121.0(3) | C16  | C17  | C12  | 121.6(3) |
| C10  | C5   | C6   | 116.6(3) | O4   | C18  | O5   | 122.7(3) |
| C7   | C6   | C5   | 121.2(3) | O4   | C18  | C13  | 125.4(3) |
| C6   | C7   | C8   | 120.4(3) | O5   | C18  | C13  | 111.7(3) |

**Table S5.** Torsion Angles for **1**.

| <b>A</b> | <b>B</b> | <b>C</b> | <b>D</b> | <b>Angle/°</b> | <b>A</b> | <b>B</b> | <b>C</b> | <b>D</b> | <b>Angle/°</b> |
|----------|----------|----------|----------|----------------|----------|----------|----------|----------|----------------|
| O1       | C1       | C2       | C3       | -2.7(4)        | C5       | C6       | C7       | C8       | 0.2(5)         |
| O1       | C1       | C2       | C12      | 174.4(3)       | C6       | C5       | C10      | C9       | -0.4(5)        |
| C1       | O1       | C4       | C3       | -0.9(3)        | C6       | C7       | C8       | O3       | -178.1(3)      |
| C1       | C2       | C3       | C4       | 2.1(4)         | C6       | C7       | C8       | C9       | 0.5(5)         |
| C1       | C2       | C3       | C5       | -173.8(3)      | C7       | C8       | C9       | C10      | -1.1(5)        |
| C1       | C2       | C12      | C13      | 60.3(4)        | C8       | C9       | C10      | C5       | 1.1(5)         |
| C1       | C2       | C12      | C17      | -113.4(3)      | C10      | C5       | C6       | C7       | -0.3(5)        |
| O2       | C1       | C2       | C3       | 178.1(4)       | C11      | O3       | C8       | C7       | 174.7(3)       |
| O2       | C1       | C2       | C12      | -4.8(6)        | C11      | O3       | C8       | C9       | -3.8(5)        |
| C2       | C3       | C4       | O1       | -0.8(3)        | C12      | C2       | C3       | C4       | -174.6(3)      |
| C2       | C3       | C5       | C6       | 7.7(6)         | C12      | C2       | C3       | C5       | 9.6(6)         |
| C2       | C3       | C5       | C10      | -175.4(3)      | C12      | C13      | C14      | C15      | -1.0(5)        |
| C2       | C12      | C13      | C14      | -173.3(3)      | C12      | C13      | C18      | O4       | 24.7(5)        |
| C2       | C12      | C13      | C18      | 8.7(5)         | C12      | C13      | C18      | O5       | -159.8(3)      |
| C2       | C12      | C17      | C16      | 174.1(3)       | C13      | C12      | C17      | C16      | 0.1(5)         |
| O3       | C8       | C9       | C10      | 177.3(3)       | C13      | C14      | C15      | C16      | 1.1(5)         |
| C3       | C2       | C12      | C13      | -123.3(4)      | C14      | C13      | C18      | O4       | -153.3(3)      |
| C3       | C2       | C12      | C17      | 63.0(5)        | C14      | C13      | C18      | O5       | 22.2(4)        |
| C3       | C5       | C6       | C7       | 176.8(3)       | C14      | C15      | C16      | C17      | -0.6(5)        |
| C3       | C5       | C10      | C9       | -177.5(3)      | C15      | C16      | C17      | C12      | 0.0(5)         |
| C4       | O1       | C1       | O2       | -178.5(3)      | C17      | C12      | C13      | C14      | 0.4(5)         |
| C4       | O1       | C1       | C2       | 2.2(3)         | C17      | C12      | C13      | C18      | -177.6(3)      |
| C4       | C3       | C5       | C6       | -167.7(3)      | C18      | C13      | C14      | C15      | 176.9(3)       |
| C4       | C3       | C5       | C10      | 9.2(5)         | C19      | O5       | C18      | O4       | -2.6(5)        |
| C5       | C3       | C4       | O1       | 175.7(3)       | C19      | O5       | C18      | C13      | -178.3(3)      |

**Table S6.** Bond Lengths for **2**.

| Atom | Atom | Length/Å | Atom | Atom | Length/Å |
|------|------|----------|------|------|----------|
| O1   | C1   | 1.372(3) | O7   | C16  | 1.447(3) |
| O1   | C3   | 1.382(3) | C7   | C8   | 1.475(3) |
| N1   | C1   | 1.294(3) | C7   | C9   | 1.481(3) |
| N1   | C2   | 1.394(3) | C9   | C10  | 1.403(3) |
| C1   | C17  | 1.456(3) | C9   | C14  | 1.391(4) |
| O2   | C5   | 1.436(3) | C10  | C11  | 1.395(4) |
| O2   | C8   | 1.365(3) | C10  | C15  | 1.489(3) |
| C2   | C3   | 1.368(3) | C11  | C12  | 1.383(4) |
| C2   | C6   | 1.448(3) | C12  | C13  | 1.378(4) |
| O3   | C8   | 1.204(3) | C13  | C14  | 1.384(3) |
| C3   | C4   | 1.485(3) | C17  | C18  | 1.398(3) |
| O4   | C23  | 1.200(3) | C17  | C22  | 1.397(4) |
| O5   | C23  | 1.348(3) | C18  | C19  | 1.387(4) |
| O5   | C24  | 1.453(3) | C19  | C20  | 1.391(3) |
| C5   | C6   | 1.501(3) | C20  | C21  | 1.387(4) |
| O6   | C15  | 1.208(3) | C20  | C23  | 1.489(4) |
| C6   | C7   | 1.350(3) | C21  | C22  | 1.381(4) |
| O7   | C15  | 1.341(3) |      |      |          |

**Table S7.** Bond Angles for **2**.

| Atom | Atom | Atom | Angle/°    | Atom | Atom | Atom | Angle/°  |
|------|------|------|------------|------|------|------|----------|
| C1   | O1   | C3   | 104.99(18) | C14  | C9   | C7   | 119.5(2) |
| C1   | N1   | C2   | 105.41(19) | C14  | C9   | C10  | 118.9(2) |
| O1   | C1   | C17  | 119.0(2)   | C9   | C10  | C15  | 121.3(2) |
| N1   | C1   | O1   | 113.5(2)   | C11  | C10  | C9   | 119.4(2) |
| N1   | C1   | C17  | 127.5(2)   | C11  | C10  | C15  | 119.0(2) |
| C8   | O2   | C5   | 109.07(19) | C12  | C11  | C10  | 120.7(3) |
| N1   | C2   | C6   | 121.3(2)   | C13  | C12  | C11  | 119.8(3) |
| C3   | C2   | N1   | 109.0(2)   | C12  | C13  | C14  | 120.2(3) |
| C3   | C2   | C6   | 129.6(2)   | C13  | C14  | C9   | 120.9(3) |
| O1   | C3   | C4   | 116.5(2)   | O6   | C15  | O7   | 122.5(2) |
| C2   | C3   | O1   | 107.1(2)   | O6   | C15  | C10  | 125.4(2) |
| C2   | C3   | C4   | 136.4(3)   | O7   | C15  | C10  | 112.0(2) |
| C23  | O5   | C24  | 115.6(2)   | C18  | C17  | C1   | 118.4(2) |
| O2   | C5   | C6   | 105.29(19) | C22  | C17  | C1   | 121.8(2) |
| C2   | C6   | C5   | 122.4(2)   | C22  | C17  | C18  | 119.7(2) |
| C7   | C6   | C2   | 129.0(2)   | C19  | C18  | C17  | 120.0(2) |
| C7   | C6   | C5   | 108.5(2)   | C18  | C19  | C20  | 120.0(2) |
| C15  | O7   | C16  | 115.9(2)   | C19  | C20  | C23  | 118.1(2) |
| C6   | C7   | C8   | 107.9(2)   | C21  | C20  | C19  | 119.8(2) |
| C6   | C7   | C9   | 131.6(2)   | C21  | C20  | C23  | 122.1(2) |
| C8   | C7   | C9   | 120.5(2)   | C22  | C21  | C20  | 120.8(3) |
| O2   | C8   | C7   | 109.0(2)   | C21  | C22  | C17  | 119.7(2) |
| O3   | C8   | O2   | 121.6(2)   | O4   | C23  | O5   | 123.3(2) |
| O3   | C8   | C7   | 129.3(2)   | O4   | C23  | C20  | 125.0(3) |
| C10  | C9   | C7   | 121.5(2)   | O5   | C23  | C20  | 111.7(2) |

**Table S8.** Torsion Angles for **2**.

| <b>A</b> | <b>B</b> | <b>C</b> | <b>D</b> | <b>Angle/°</b> | <b>A</b> | <b>B</b> | <b>C</b> | <b>D</b> | <b>Angle/°</b> |
|----------|----------|----------|----------|----------------|----------|----------|----------|----------|----------------|
| O1       | C1       | C17      | C18      | -166.9(2)      | C7       | C9       | C10      | C15      | -8.0(4)        |
| O1       | C1       | C17      | C22      | 11.4(4)        | C7       | C9       | C14      | C13      | -178.0(2)      |
| N1       | C1       | C17      | C18      | 10.1(4)        | C8       | O2       | C5       | C6       | 4.0(3)         |
| N1       | C1       | C17      | C22      | -171.6(3)      | C8       | C7       | C9       | C10      | -59.9(3)       |
| N1       | C2       | C3       | O1       | 0.0(3)         | C8       | C7       | C9       | C14      | 117.8(3)       |
| N1       | C2       | C3       | C4       | 176.7(3)       | C9       | C7       | C8       | O2       | 179.4(2)       |
| N1       | C2       | C6       | C5       | -179.5(2)      | C9       | C7       | C8       | O3       | -2.6(4)        |
| N1       | C2       | C6       | C7       | 4.3(4)         | C9       | C10      | C11      | C12      | -0.2(4)        |
| C1       | O1       | C3       | C2       | 0.3(3)         | C9       | C10      | C15      | O6       | -14.8(4)       |
| C1       | O1       | C3       | C4       | -177.2(2)      | C9       | C10      | C15      | O7       | 168.0(2)       |
| C1       | N1       | C2       | C3       | -0.3(3)        | C10      | C9       | C14      | C13      | -0.3(4)        |
| C1       | N1       | C2       | C6       | 179.5(2)       | C10      | C11      | C12      | C13      | 0.7(4)         |
| C1       | C17      | C18      | C19      | 177.1(2)       | C11      | C10      | C15      | O6       | 159.5(3)       |
| C1       | C17      | C22      | C21      | -177.4(3)      | C11      | C10      | C15      | O7       | -17.7(3)       |
| O2       | C5       | C6       | C2       | 178.5(2)       | C11      | C12      | C13      | C14      | -1.0(4)        |
| O2       | C5       | C6       | C7       | -4.6(3)        | C12      | C13      | C14      | C9       | 0.8(4)         |
| C2       | N1       | C1       | O1       | 0.5(3)         | C14      | C9       | C10      | C11      | 0.0(4)         |
| C2       | N1       | C1       | C17      | -176.6(2)      | C14      | C9       | C10      | C15      | 174.3(2)       |
| C2       | C6       | C7       | C8       | -180.0(2)      | C15      | C10      | C11      | C12      | -174.7(2)      |
| C2       | C6       | C7       | C9       | -0.3(5)        | C16      | O7       | C15      | O6       | -6.7(3)        |
| C3       | O1       | C1       | N1       | -0.5(3)        | C16      | O7       | C15      | C10      | 170.6(2)       |
| C3       | O1       | C1       | C17      | 176.9(2)       | C17      | C18      | C19      | C20      | 0.5(4)         |
| C3       | C2       | C6       | C5       | 0.4(4)         | C18      | C17      | C22      | C21      | 0.9(4)         |
| C3       | C2       | C6       | C7       | -175.8(3)      | C18      | C19      | C20      | C21      | 0.6(4)         |
| C5       | O2       | C8       | O3       | 179.7(2)       | C18      | C19      | C20      | C23      | -177.9(2)      |
| C5       | O2       | C8       | C7       | -2.1(3)        | C19      | C20      | C21      | C22      | -1.0(4)        |
| C5       | C6       | C7       | C8       | 3.4(3)         | C19      | C20      | C23      | O4       | -8.2(4)        |
| C5       | C6       | C7       | C9       | -176.9(3)      | C19      | C20      | C23      | O5       | 172.6(2)       |
| C6       | C2       | C3       | O1       | -179.8(2)      | C20      | C21      | C22      | C17      | 0.3(4)         |
| C6       | C2       | C3       | C4       | -3.1(5)        | C21      | C20      | C23      | O4       | 173.4(3)       |
| C6       | C7       | C8       | O2       | -0.9(3)        | C21      | C20      | C23      | O5       | -5.9(4)        |
| C6       | C7       | C8       | O3       | 177.1(3)       | C22      | C17      | C18      | C19      | -1.3(4)        |
| C6       | C7       | C9       | C10      | 120.4(3)       | C23      | C20      | C21      | C22      | 177.4(3)       |
| C6       | C7       | C9       | C14      | -61.9(4)       | C24      | O5       | C23      | O4       | 2.1(4)         |
| C7       | C9       | C10      | C11      | 177.7(2)       | C24      | O5       | C23      | C20      | -178.6(2)      |

**Table S9.** Bond Lengths for **6**.

| Atom | Atom | Length/Å   | Atom | Atom | Length/Å   |
|------|------|------------|------|------|------------|
| C1   | O1   | 1.3125(15) | C6   | C7   | 1.3996(16) |
| C1   | C2   | 1.4897(16) | C7   | C8   | 1.4774(17) |
| C1   | O2   | 1.2277(15) | C8   | C9   | 1.4786(16) |
| C2   | C3   | 1.3955(17) | C8   | C11  | 1.3450(17) |
| C2   | C7   | 1.4040(16) | C10  | C11  | 1.5005(16) |
| C3   | C4   | 1.3852(16) | C11  | C12  | 1.4622(16) |
| O3   | C9   | 1.3610(15) | C12  | C13  | 1.3972(17) |
| O3   | C10  | 1.4382(15) | C12  | C17  | 1.4017(16) |
| C4   | C5   | 1.3833(19) | C13  | C14  | 1.3847(17) |
| O4   | C9   | 1.2036(15) | C14  | C15  | 1.3891(17) |
| C5   | C6   | 1.3869(18) | C15  | C16  | 1.3981(17) |
| O5   | C15  | 1.3603(14) | C16  | C17  | 1.3804(16) |
| O5   | C18  | 1.4347(16) |      |      |            |

**Table S10.** Bond Angles for **6**.

| Atom | Atom | Atom | Angle/°    | Atom | Atom | Atom | Angle/°    |
|------|------|------|------------|------|------|------|------------|
| C2   | C1   | O1   | 115.42(10) | O4   | C9   | O3   | 121.85(11) |
| O2   | C1   | O1   | 123.25(10) | C8   | C9   | O3   | 108.73(10) |
| O2   | C1   | C2   | 121.25(10) | C8   | C9   | O4   | 129.41(11) |
| C3   | C2   | C1   | 116.43(10) | C11  | C10  | O3   | 105.13(9)  |
| C7   | C2   | C1   | 123.67(10) | C10  | C11  | C8   | 108.65(10) |
| C7   | C2   | C3   | 119.87(10) | C12  | C11  | C8   | 130.25(10) |
| C4   | C3   | C2   | 121.06(11) | C12  | C11  | C10  | 121.07(10) |
| C10  | O3   | C9   | 109.38(9)  | C13  | C12  | C11  | 120.95(10) |
| C5   | C4   | C3   | 119.29(11) | C17  | C12  | C11  | 121.05(10) |
| C6   | C5   | C4   | 120.31(11) | C17  | C12  | C13  | 117.98(10) |
| C18  | O5   | C15  | 117.11(9)  | C14  | C13  | C12  | 121.70(11) |
| C7   | C6   | C5   | 121.19(11) | C15  | C14  | C13  | 119.34(11) |
| C6   | C7   | C2   | 118.21(11) | C14  | C15  | O5   | 124.19(11) |
| C8   | C7   | C2   | 123.68(10) | C16  | C15  | O5   | 115.77(10) |
| C8   | C7   | C6   | 117.98(10) | C16  | C15  | C14  | 120.03(11) |
| C9   | C8   | C7   | 121.13(10) | C17  | C16  | C15  | 119.99(11) |
| C11  | C8   | C7   | 130.48(10) | C16  | C17  | C12  | 120.93(11) |
| C11  | C8   | C9   | 108.11(10) |      |      |      |            |



**Table S11.** Torsion Angles for **6**.

| <b>A</b> | <b>B</b> | <b>C</b> | <b>D</b> | <b>Angle/°</b> | <b>A</b> | <b>B</b> | <b>C</b> | <b>D</b> | <b>Angle/°</b> |
|----------|----------|----------|----------|----------------|----------|----------|----------|----------|----------------|
| C1       | C2       | C3       | C4       | 174.93(11)     | O5       | C15      | C14      | C13      | 179.77(11)     |
| C1       | C2       | C7       | C6       | -175.23(12)    | O5       | C15      | C16      | C17      | 179.10(10)     |
| C1       | C2       | C7       | C8       | 8.95(14)       | C6       | C7       | C8       | C9       | -123.46(11)    |
| C2       | C3       | C4       | C5       | 0.91(15)       | C6       | C7       | C8       | C11      | 49.81(14)      |
| C2       | C7       | C6       | C5       | -0.06(13)      | C7       | C8       | C11      | C10      | -173.94(13)    |
| C2       | C7       | C8       | C9       | 52.37(13)      | C7       | C8       | C11      | C12      | 8.33(16)       |
| C2       | C7       | C8       | C11      | -134.36(12)    | C8       | C11      | C12      | C13      | 27.39(15)      |
| C3       | C4       | C5       | C6       | 1.50(15)       | C8       | C11      | C12      | C17      | -154.45(12)    |
| O3       | C9       | C8       | C7       | 174.60(8)      | C10      | C11      | C12      | C13      | -150.10(11)    |
| O3       | C9       | C8       | C11      | -0.02(10)      | C10      | C11      | C12      | C17      | 28.06(12)      |
| O3       | C10      | C11      | C8       | 0.02(10)       | C11      | C12      | C13      | C14      | 178.63(11)     |
| O3       | C10      | C11      | C12      | 177.99(8)      | C11      | C12      | C17      | C16      | -179.85(10)    |
| C4       | C5       | C6       | C7       | -1.93(16)      | C12      | C13      | C14      | C15      | 0.94(14)       |
| O4       | C9       | C8       | C7       | -3.86(16)      | C12      | C17      | C16      | C15      | 1.50(13)       |
| O4       | C9       | C8       | C11      | -178.48(14)    | C13      | C14      | C15      | C16      | -1.09(14)      |
| C5       | C6       | C7       | C8       | 176.00(12)     | C14      | C15      | C16      | C17      | -0.12(13)      |

## V. Copies of NMR spectra

$^1\text{H}$  NMR spectrum of **1** in  $\text{CDCl}_3$

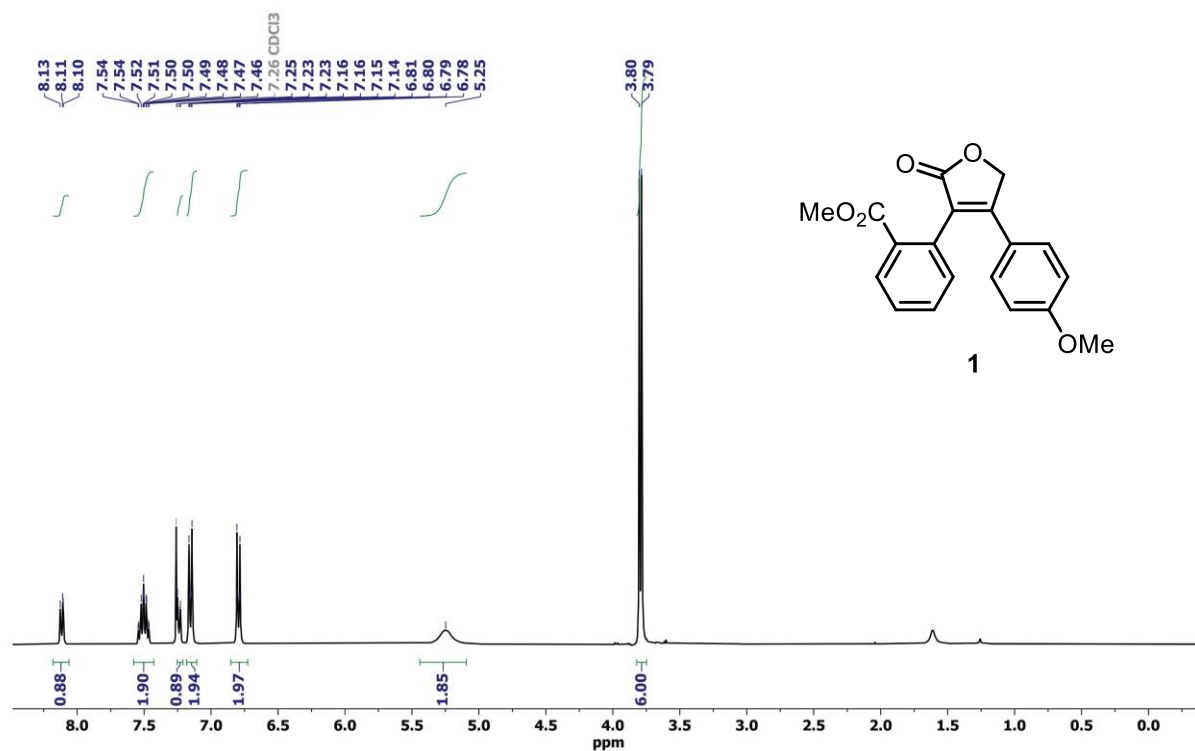

$^1\text{H}$  NMR spectrum of **1** in  $\text{DMSO}-d_6$

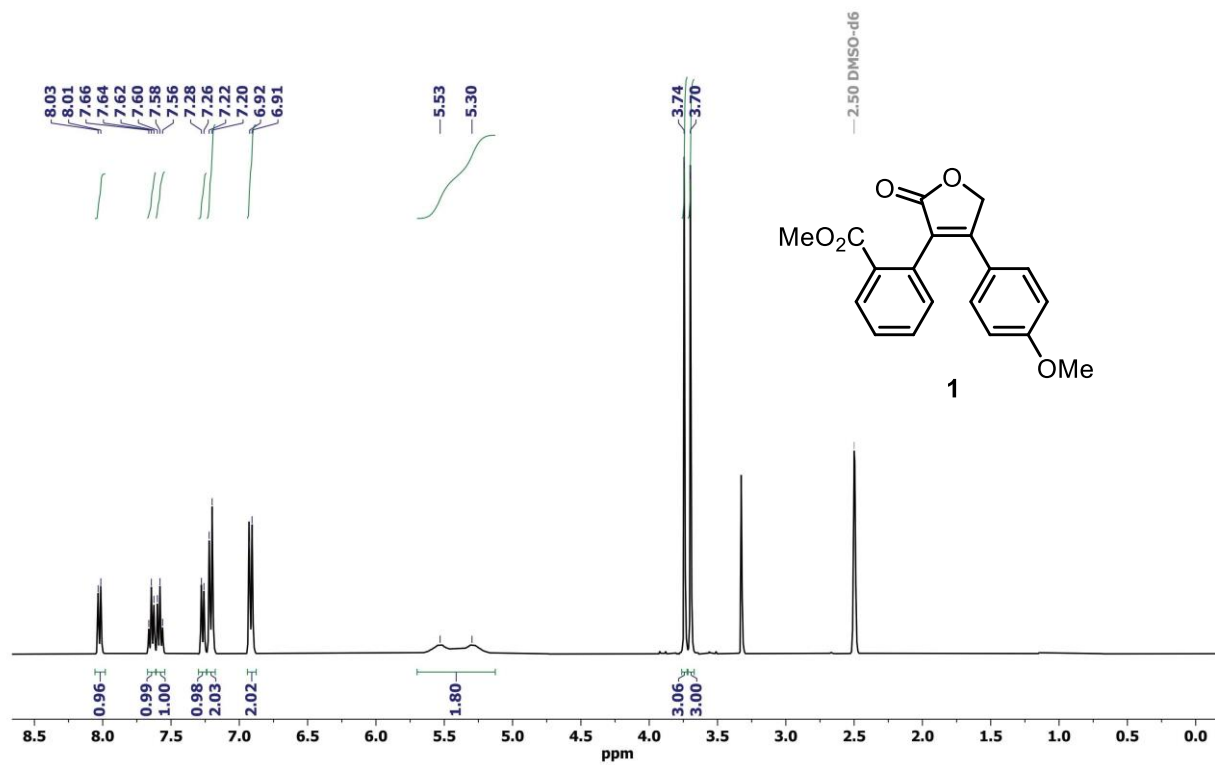

$^{13}\text{C}\{^1\text{H}\}$  NMR spectrum of **1** in  $\text{CDCl}_3$

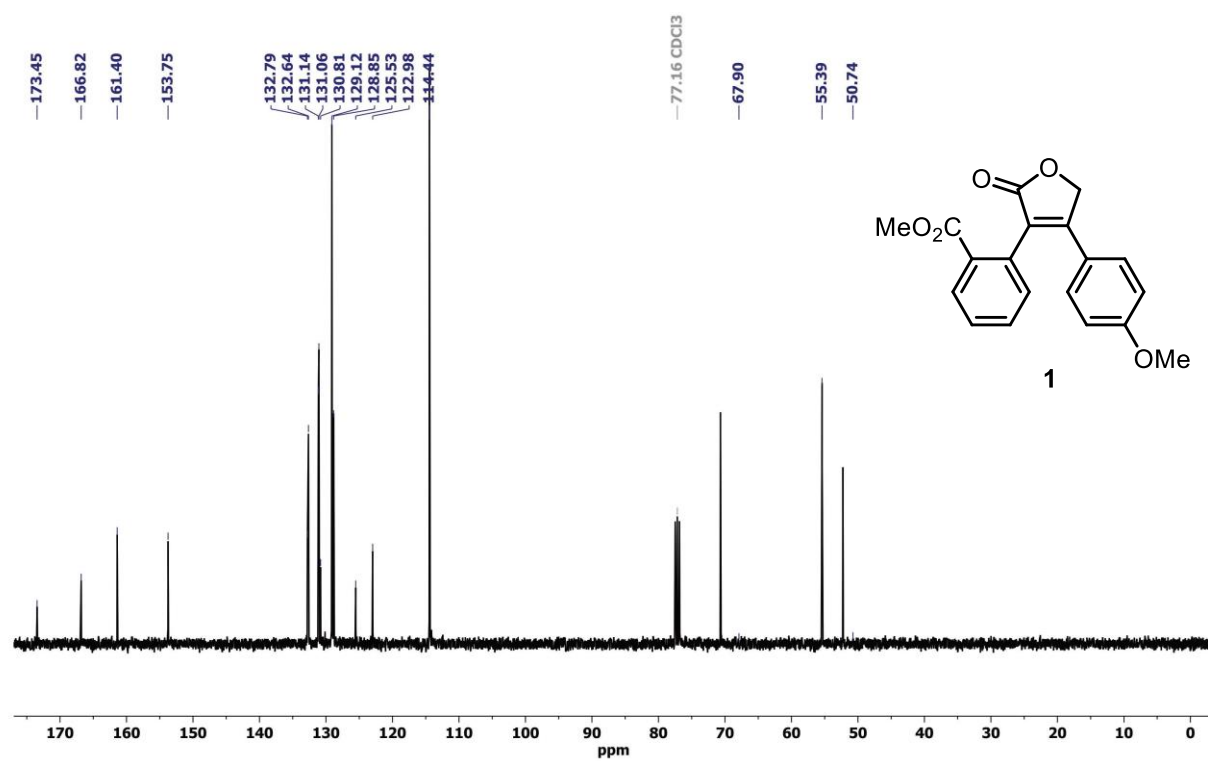

$^1\text{H}$  NMR spectrum of **2** in  $\text{CDCl}_3$

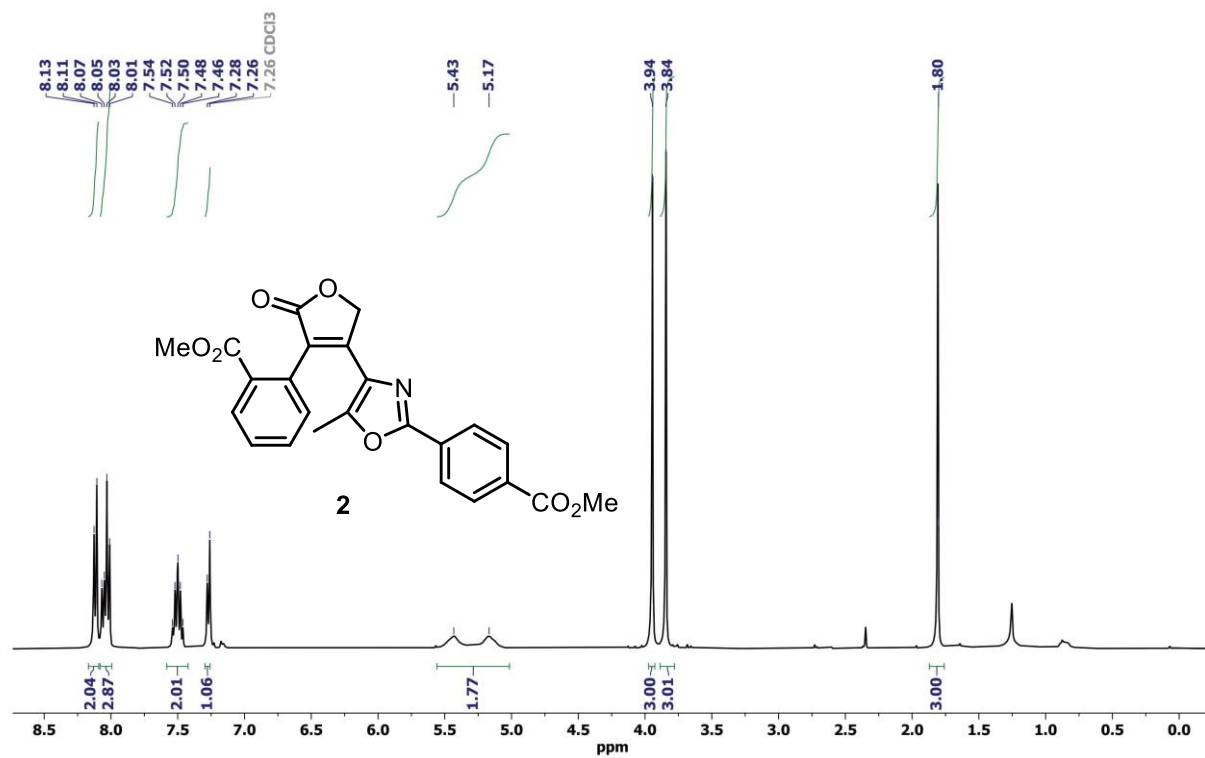

$^1\text{H}$  NMR spectrum of **2** in  $\text{DMSO}-d_6$

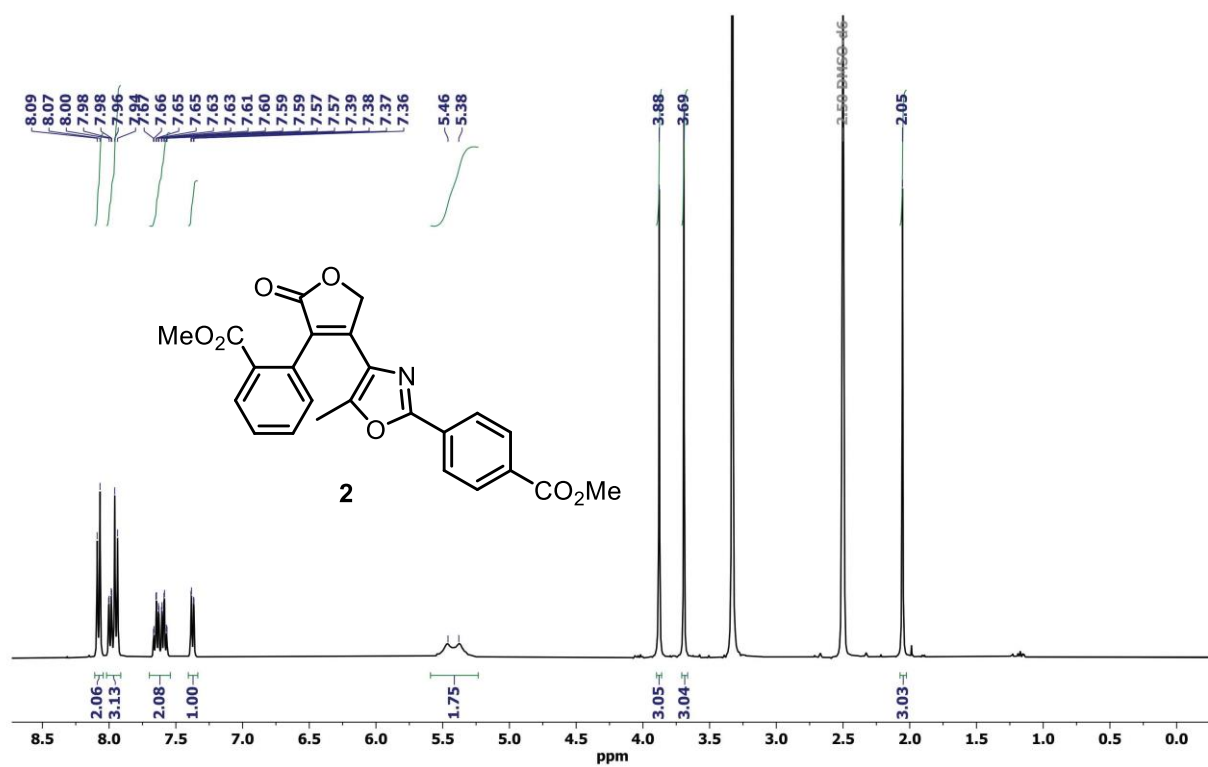

$^{13}\text{C}\{^1\text{H}\}$  NMR spectrum of **2** in  $\text{CDCl}_3$

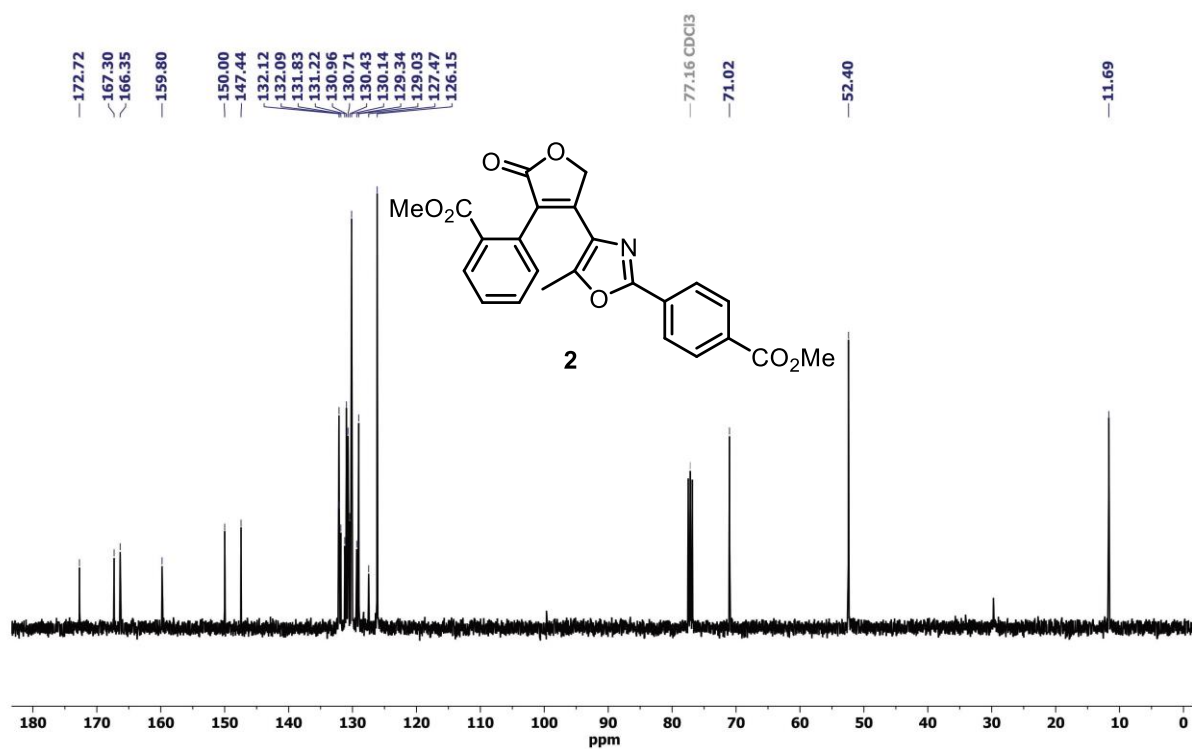

$^1\text{H}$  NMR spectrum of **3** in  $\text{CDCl}_3$

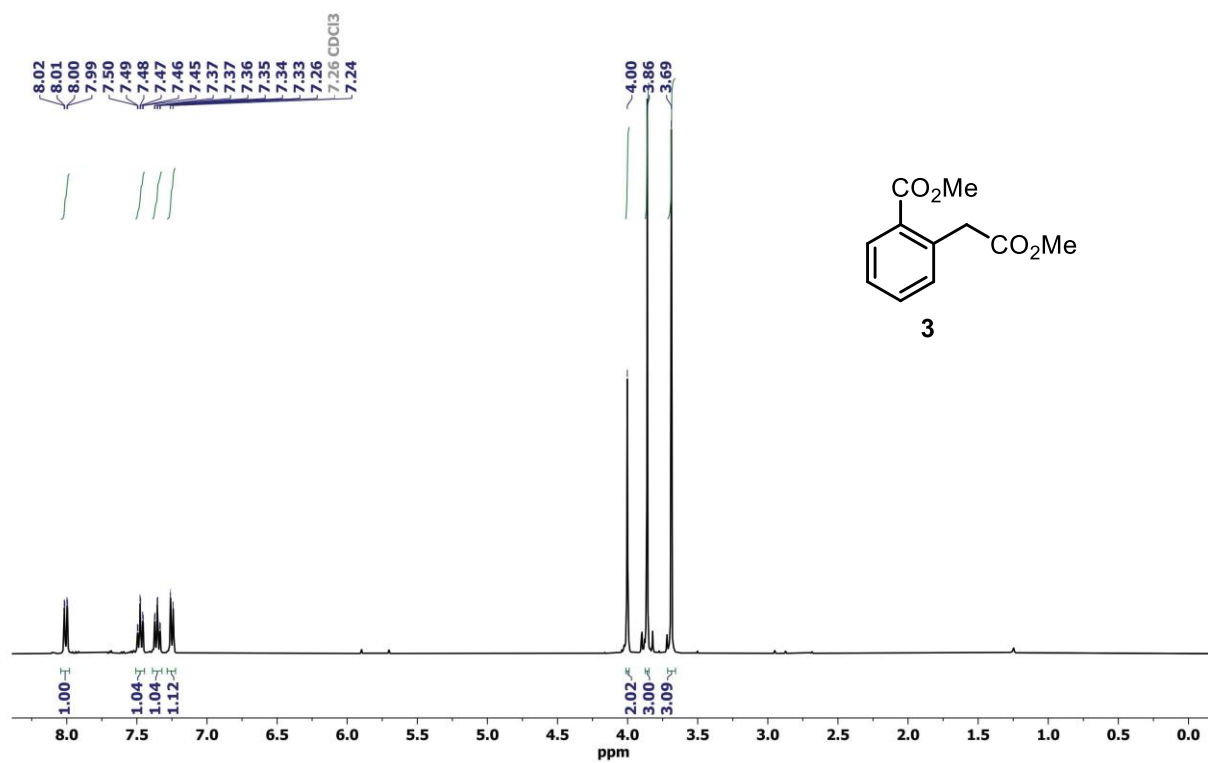

$^{13}\text{C}\{^1\text{H}\}$  NMR spectrum of **3** in  $\text{CDCl}_3$

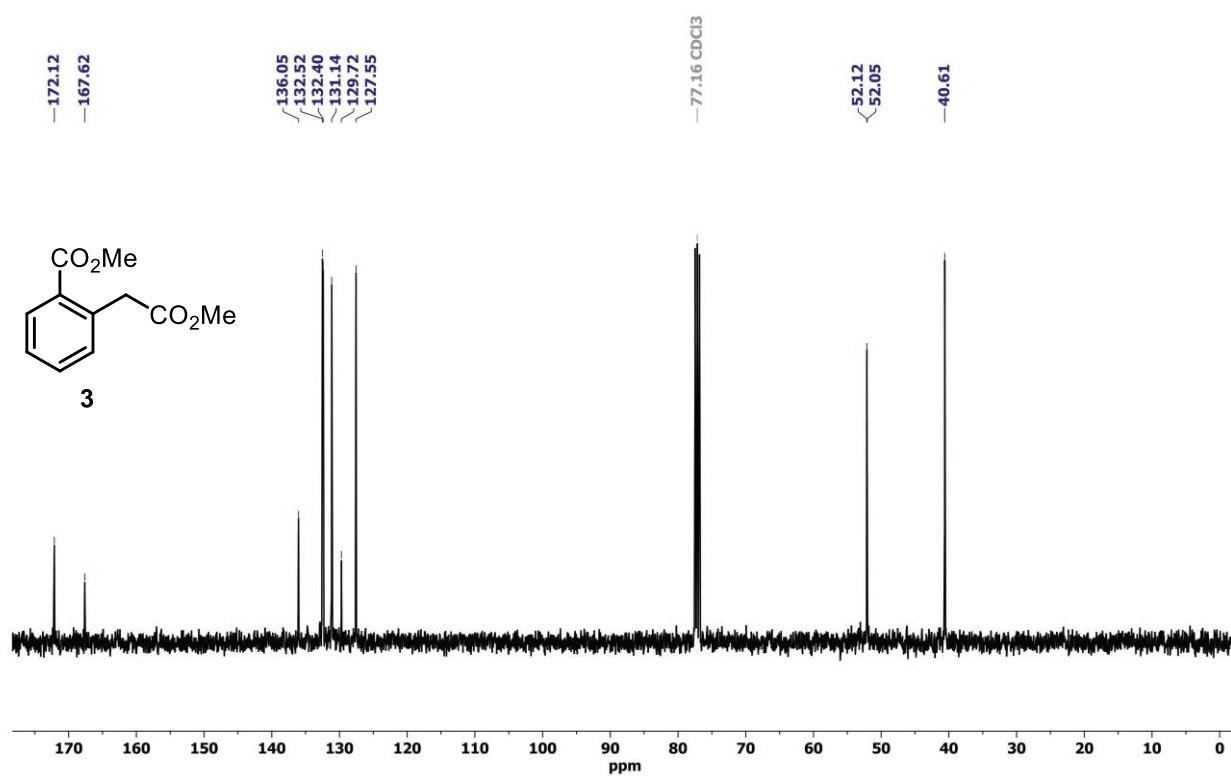

$^1\text{H}$  NMR spectrum of **4** in  $\text{CDCl}_3$

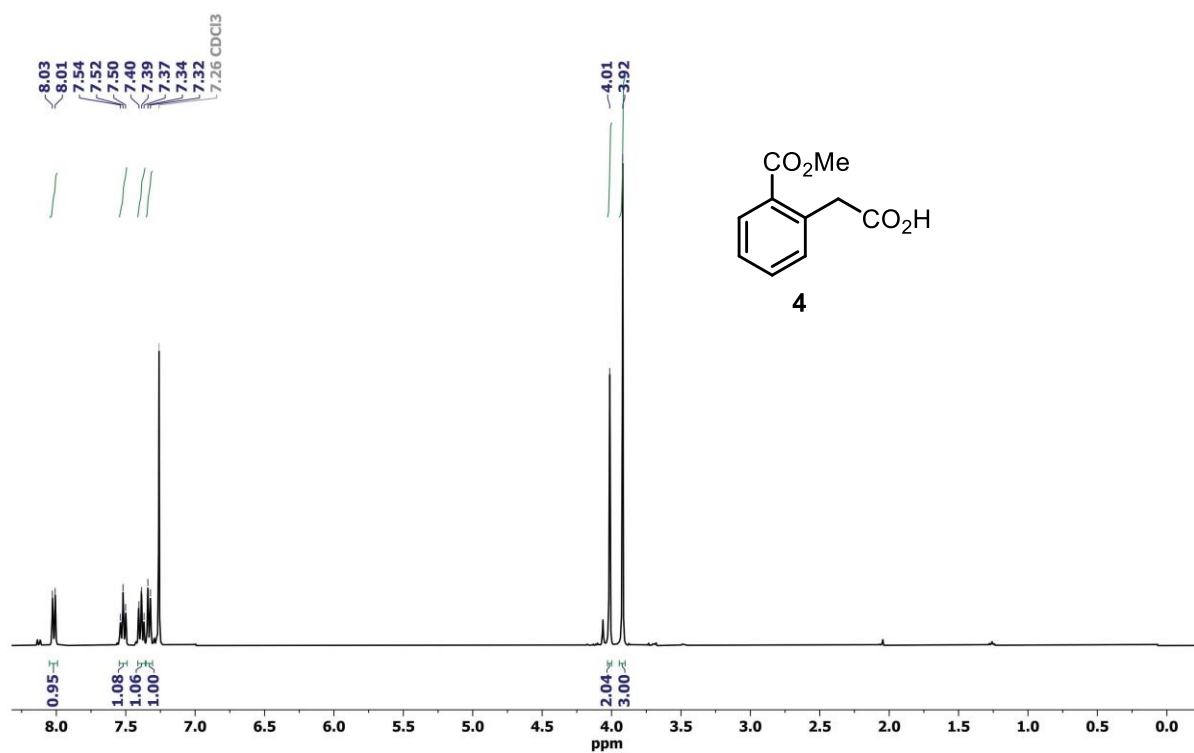

$^{13}\text{C}\{^1\text{H}\}$  NMR spectrum of **4** in  $\text{CDCl}_3$

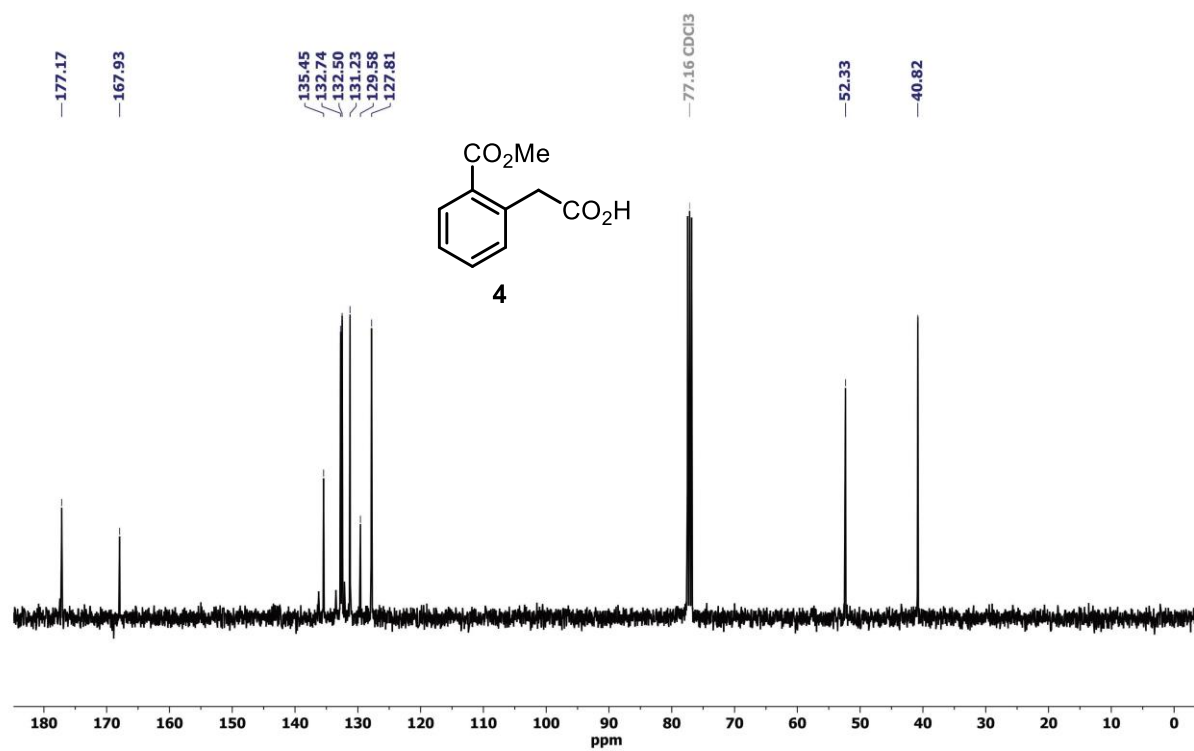

$^1\text{H}$  NMR spectrum of **6** in  $\text{DMSO}-d_6$

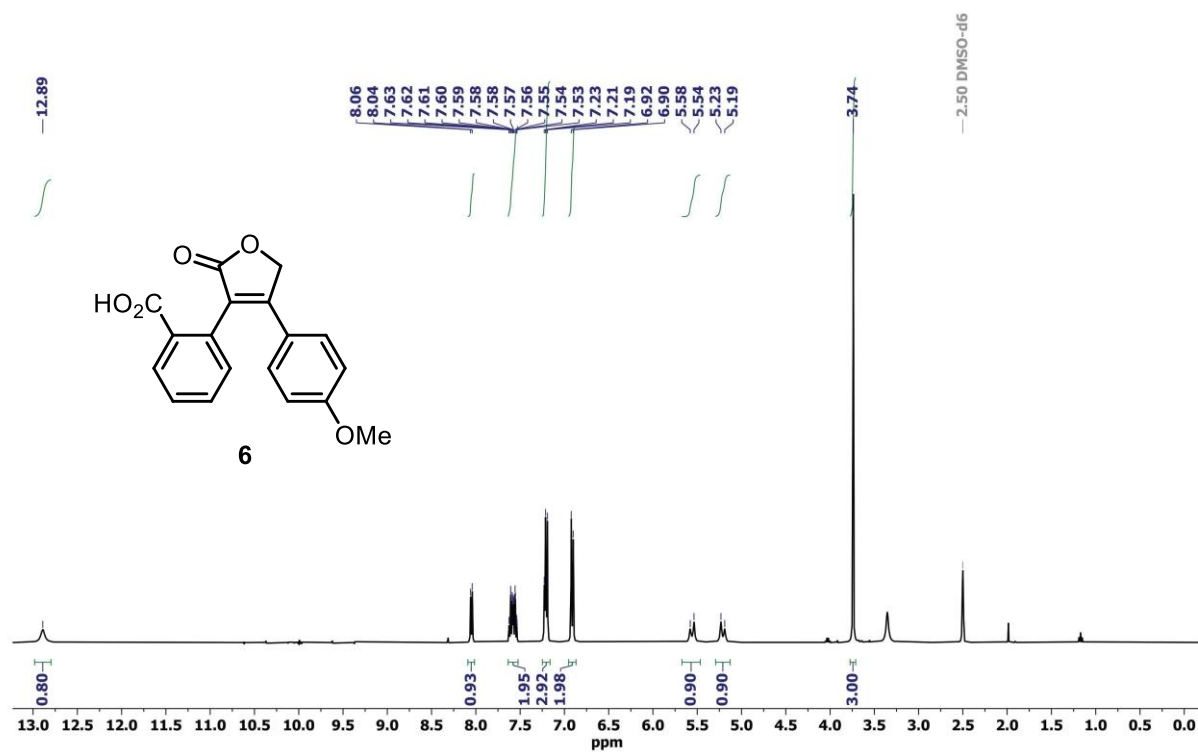

$^{13}\text{C}\{^1\text{H}\}$  NMR spectrum of **6** in  $\text{DMSO}-d_6$

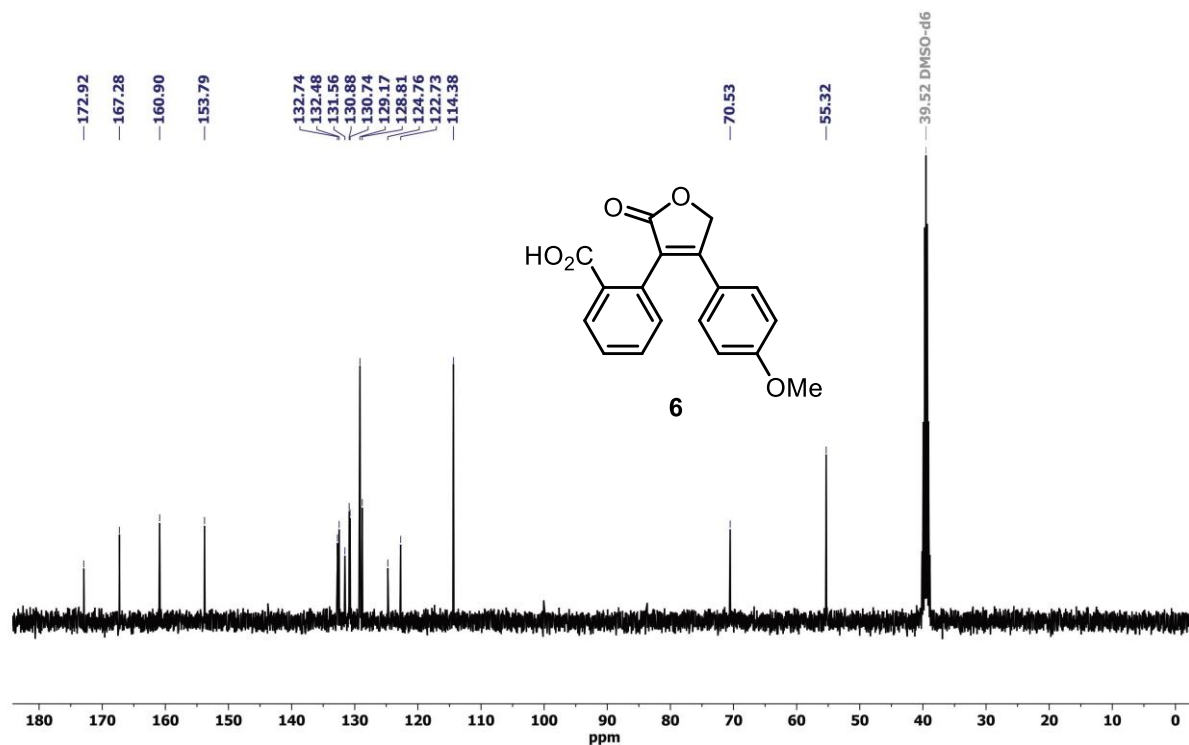



$^1\text{H}$  NMR spectrum of **7** in  $\text{DMSO-}d_6$

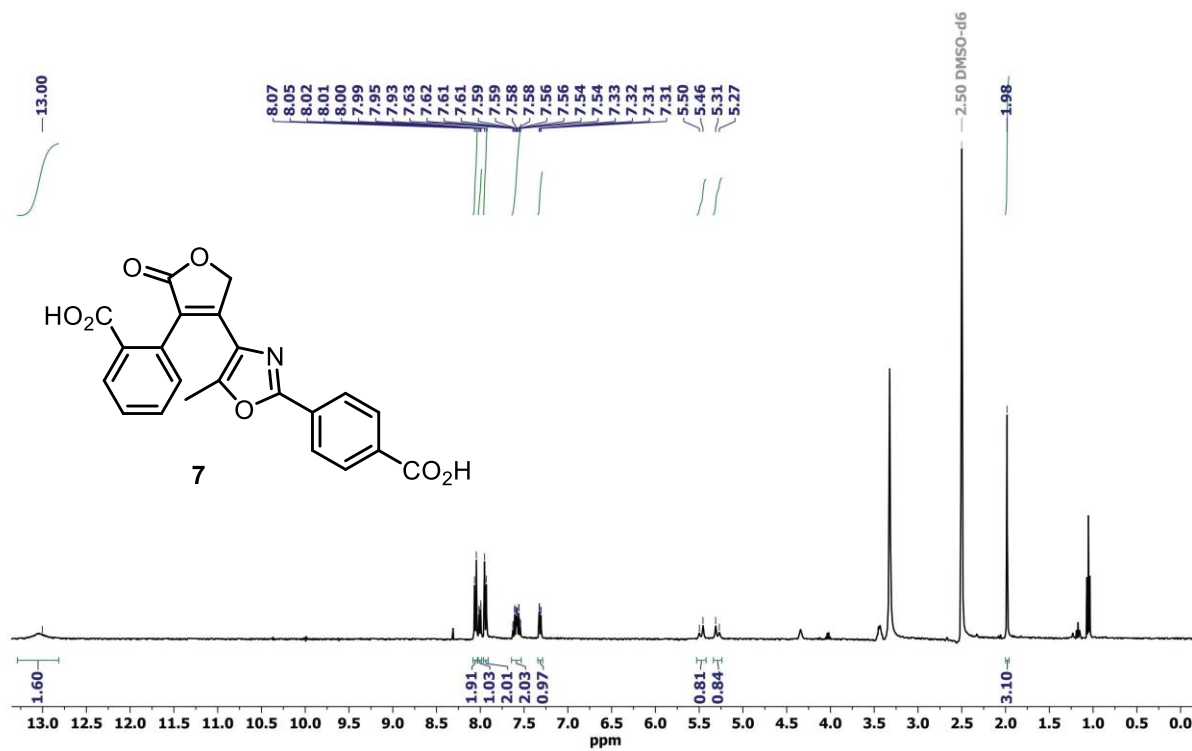

$^{13}\text{C}\{^1\text{H}\}$  NMR spectrum of **7** in  $\text{DMSO-}d_6$

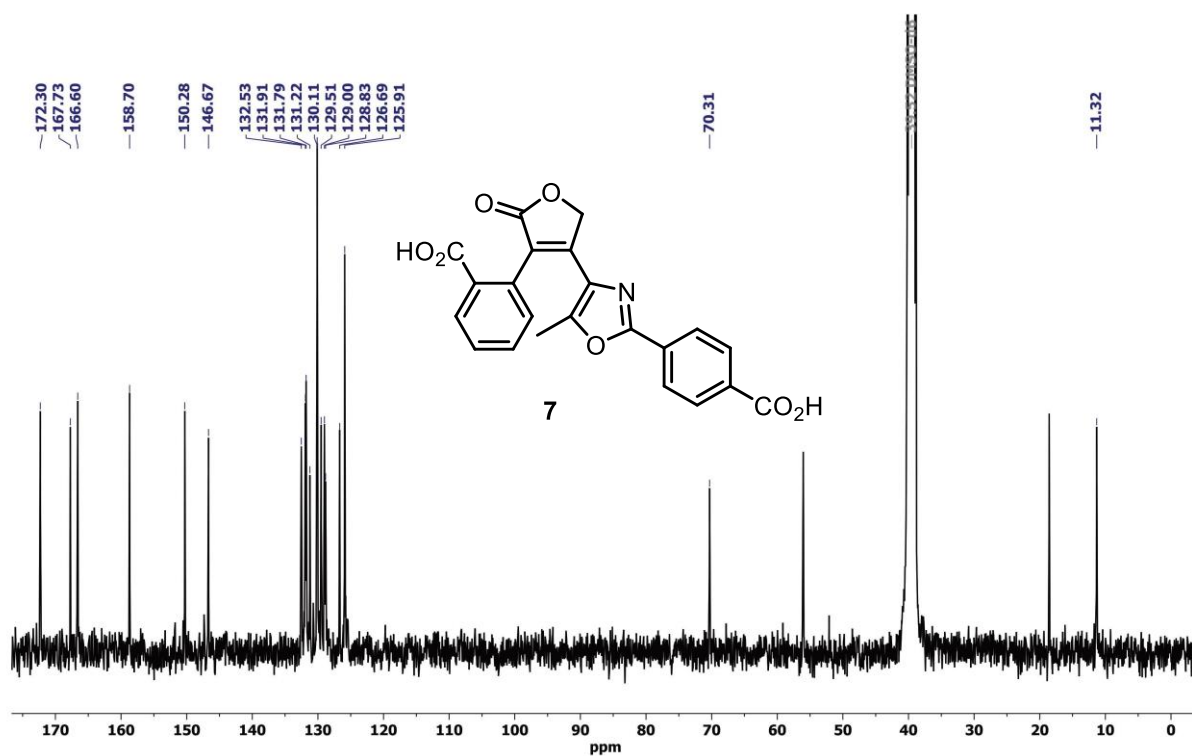

$^1\text{H}$  NMR spectrum of **8** in  $\text{D}_2\text{O}$

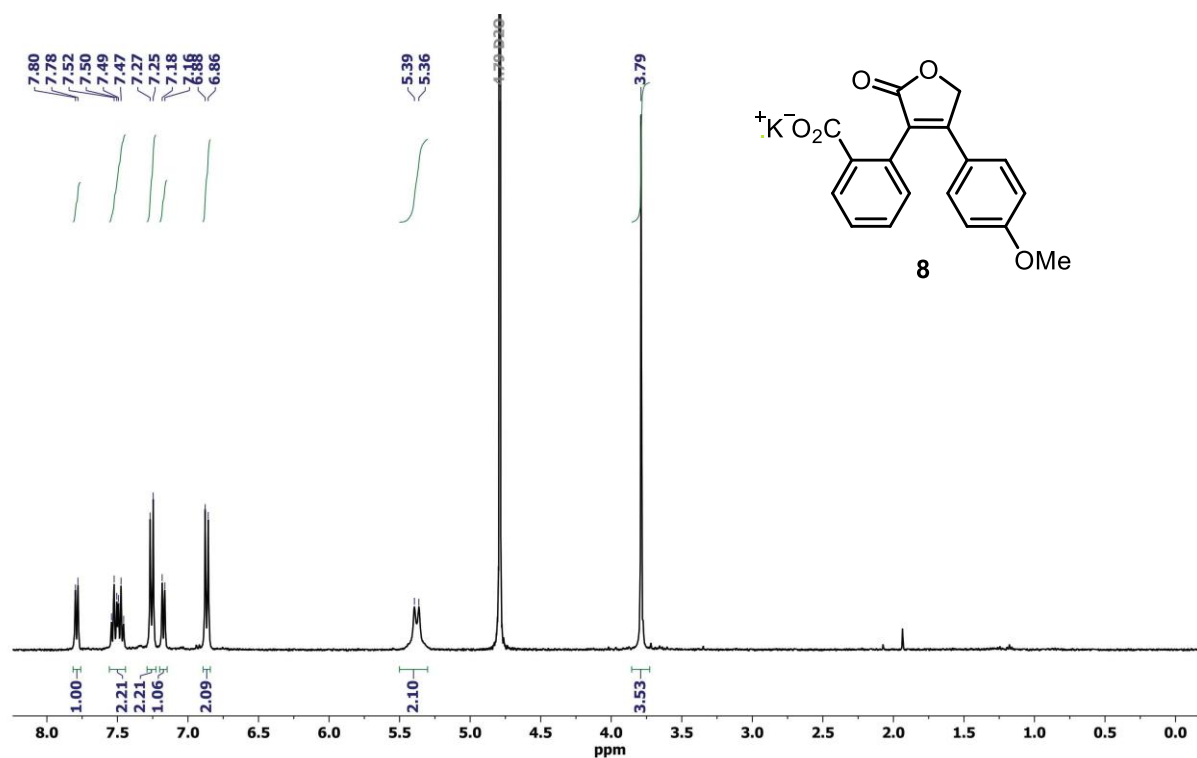

$^{13}\text{C}\{^1\text{H}\}$  NMR spectrum of **8** in  $\text{D}_2\text{O}$

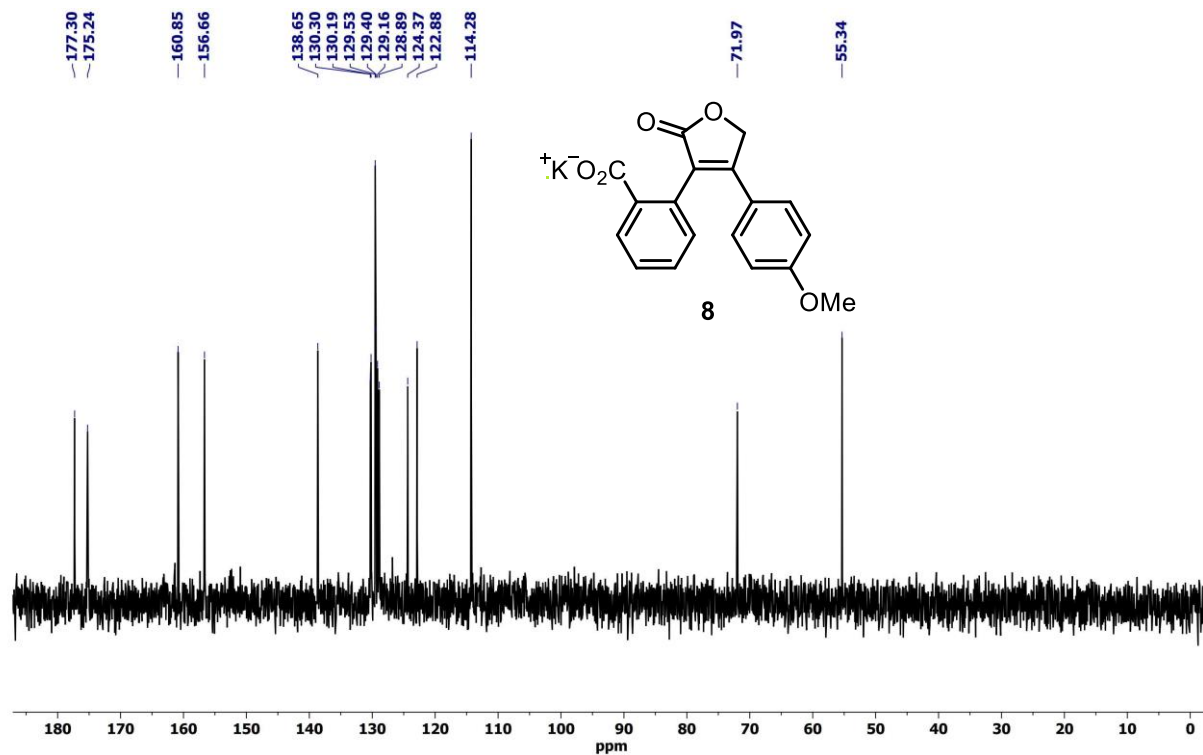

$^1\text{H}$  NMR spectrum of **9** in  $\text{D}_2\text{O}$

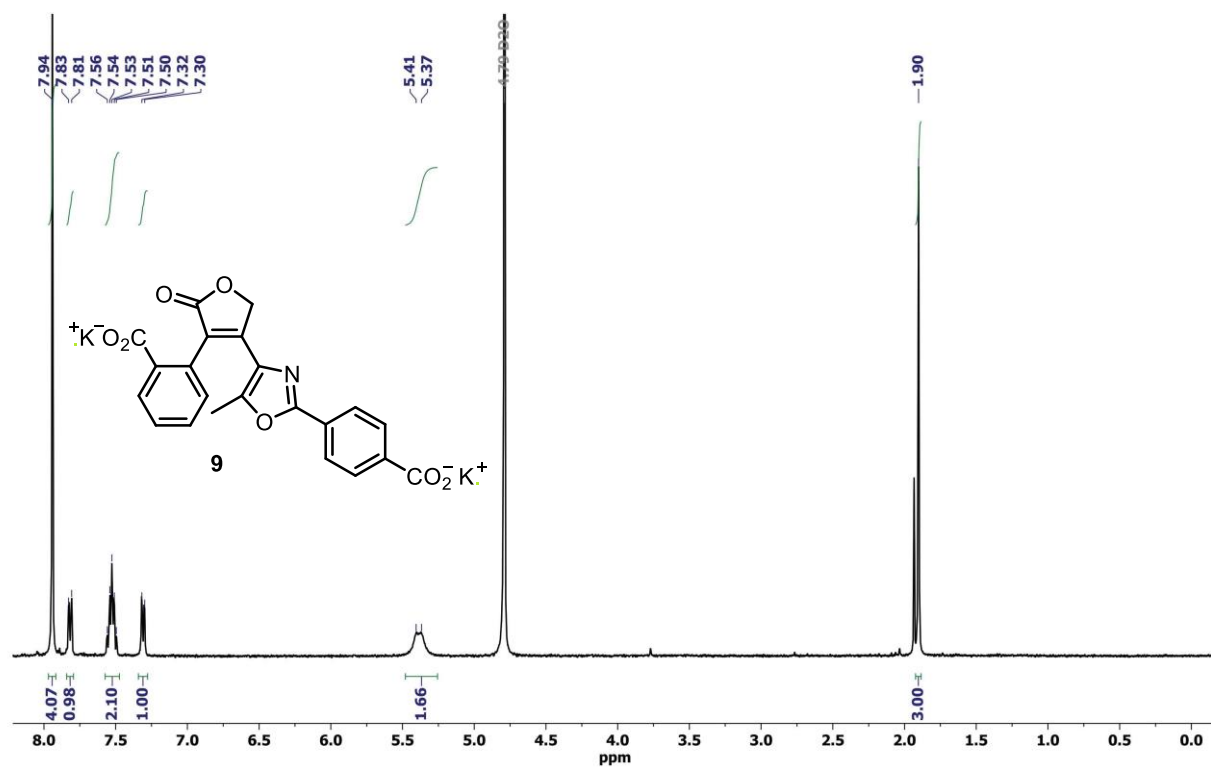

$^{13}\text{C}\{^1\text{H}\}$  NMR spectrum of **9** in  $\text{D}_2\text{O}$

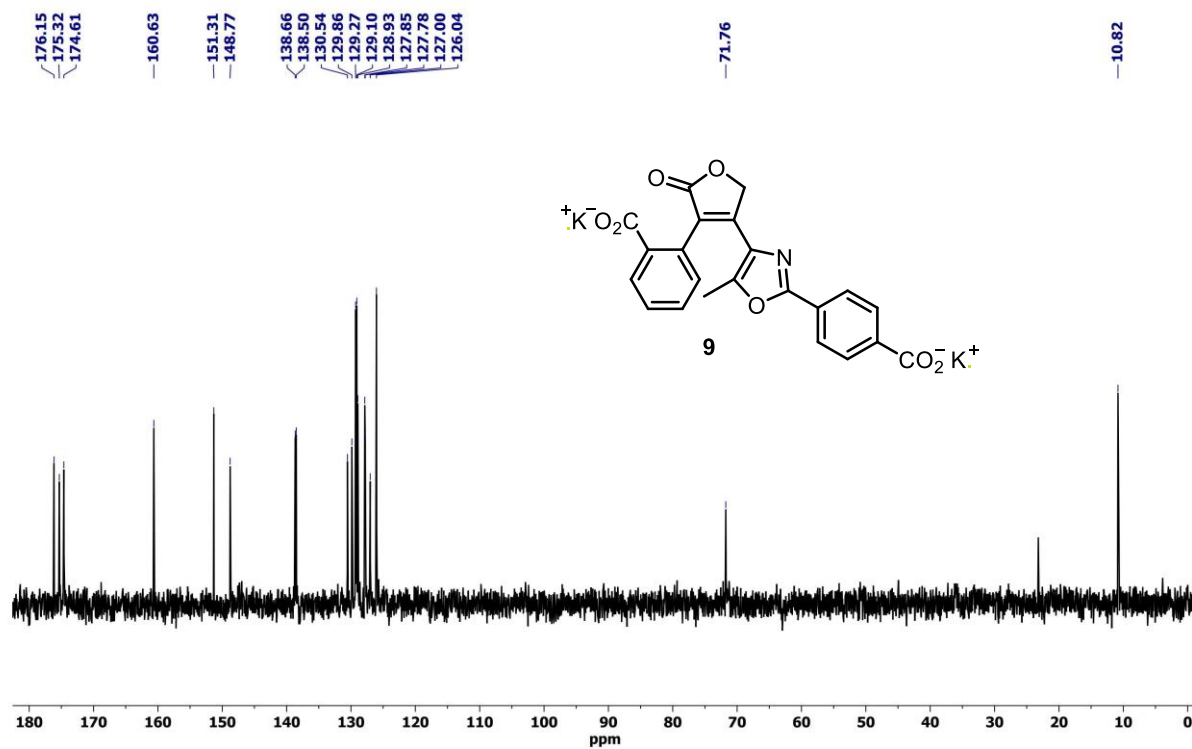

$^1\text{H}$  NMR spectrum of **10** in  $\text{CDCl}_3$

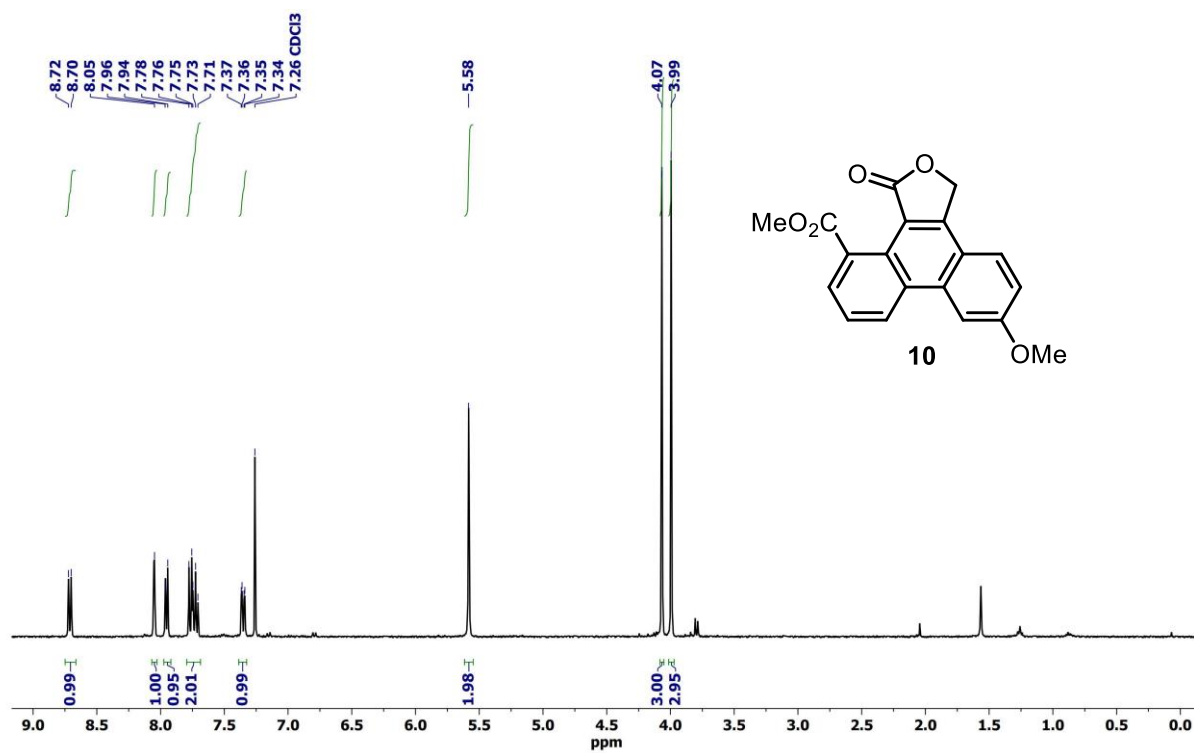

$^1\text{H}$  NMR spectrum of **10** in  $\text{DMSO}-d_6$

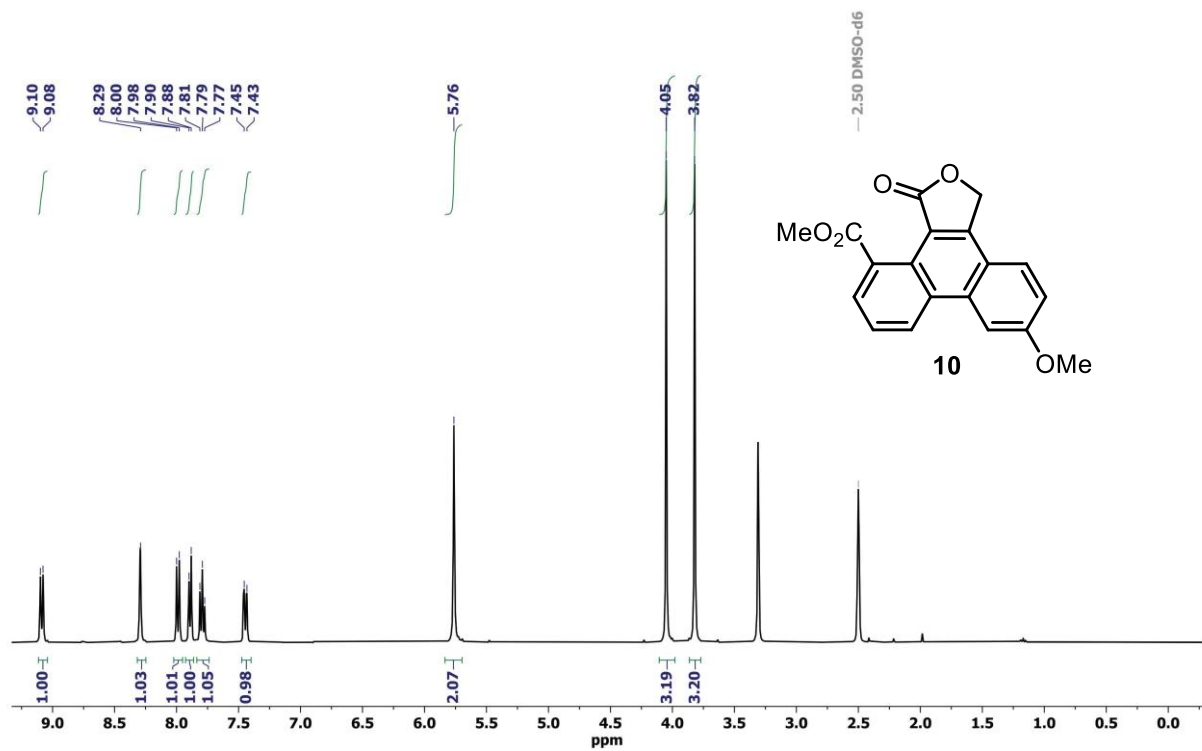

$^{13}\text{C}\{^1\text{H}\}$  NMR spectrum of **10** in  $\text{DMSO-}d_6$

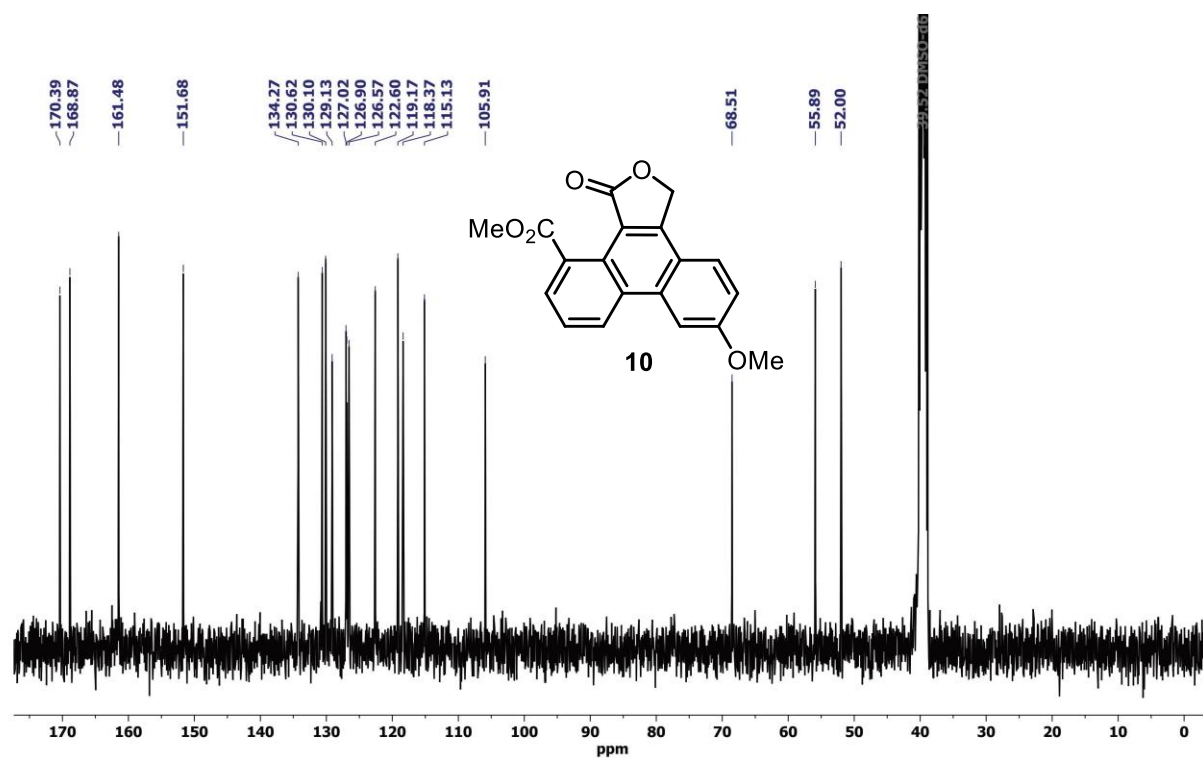

$^1\text{H}$  NMR spectrum of **11** in  $\text{CDCl}_3$

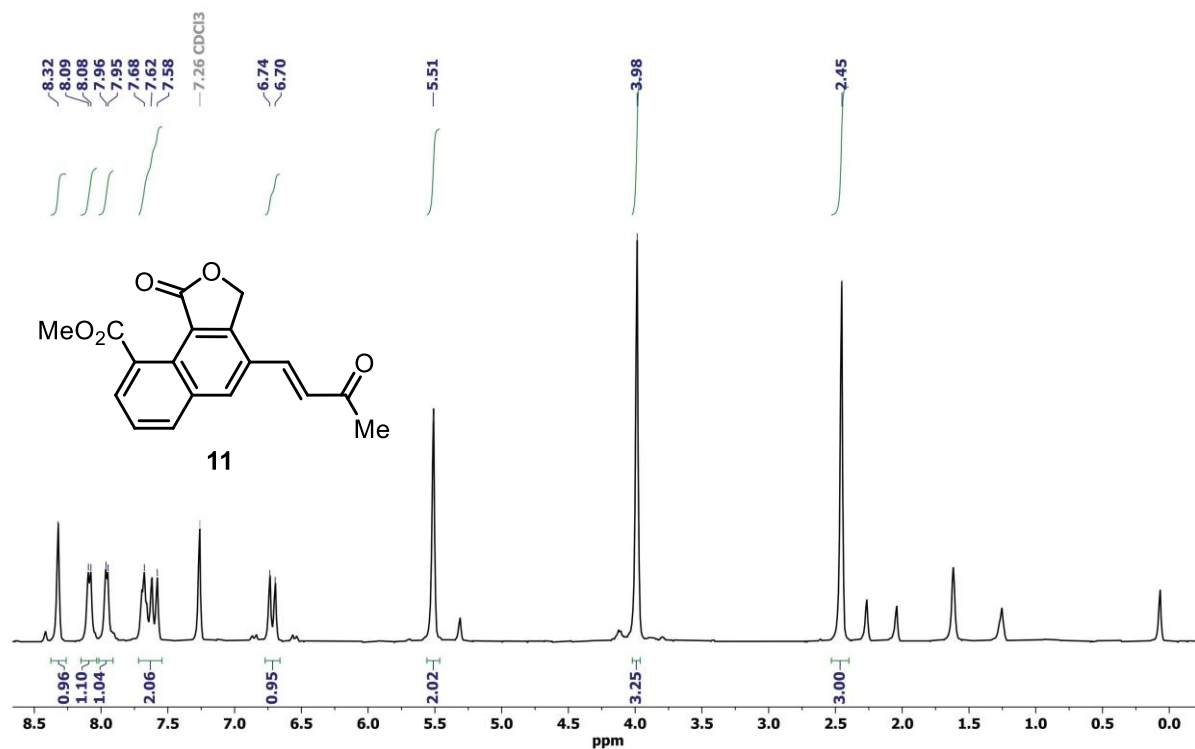

$^1\text{H}$  NMR spectrum of **11** in  $\text{DMSO}-d_6$

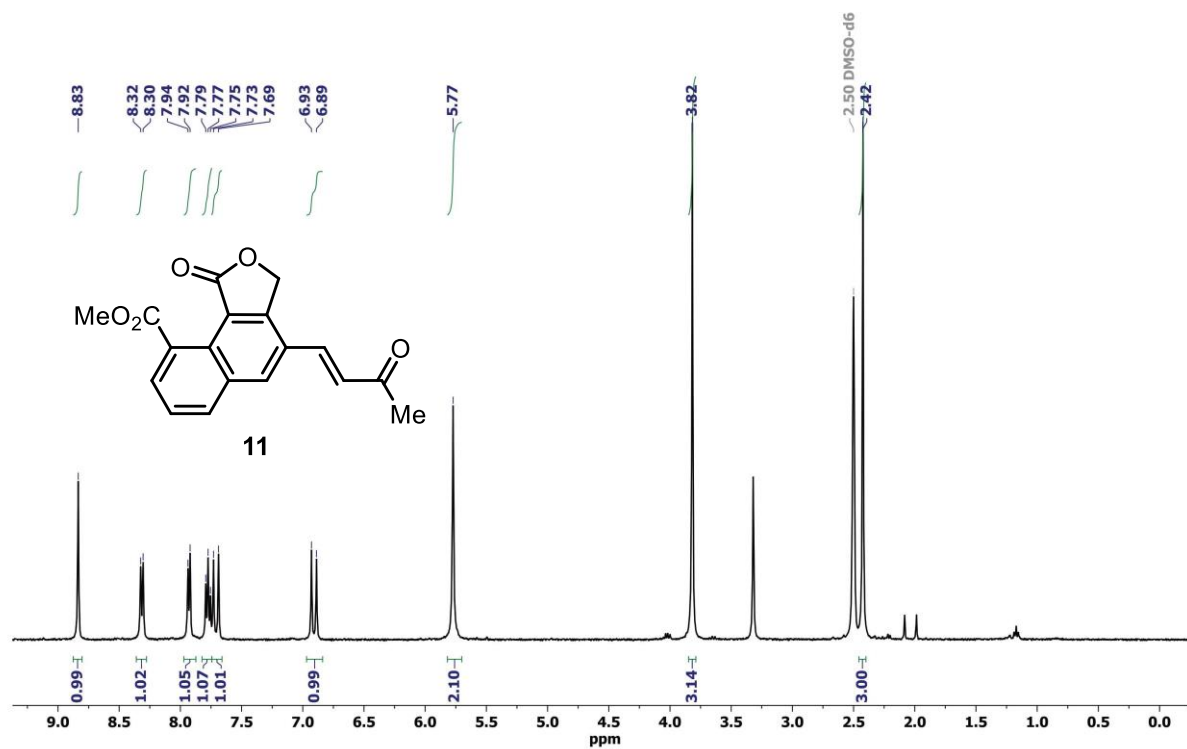

$^{13}\text{C}\{^1\text{H}\}$  NMR spectrum of **11** in  $\text{DMSO-}d_6$

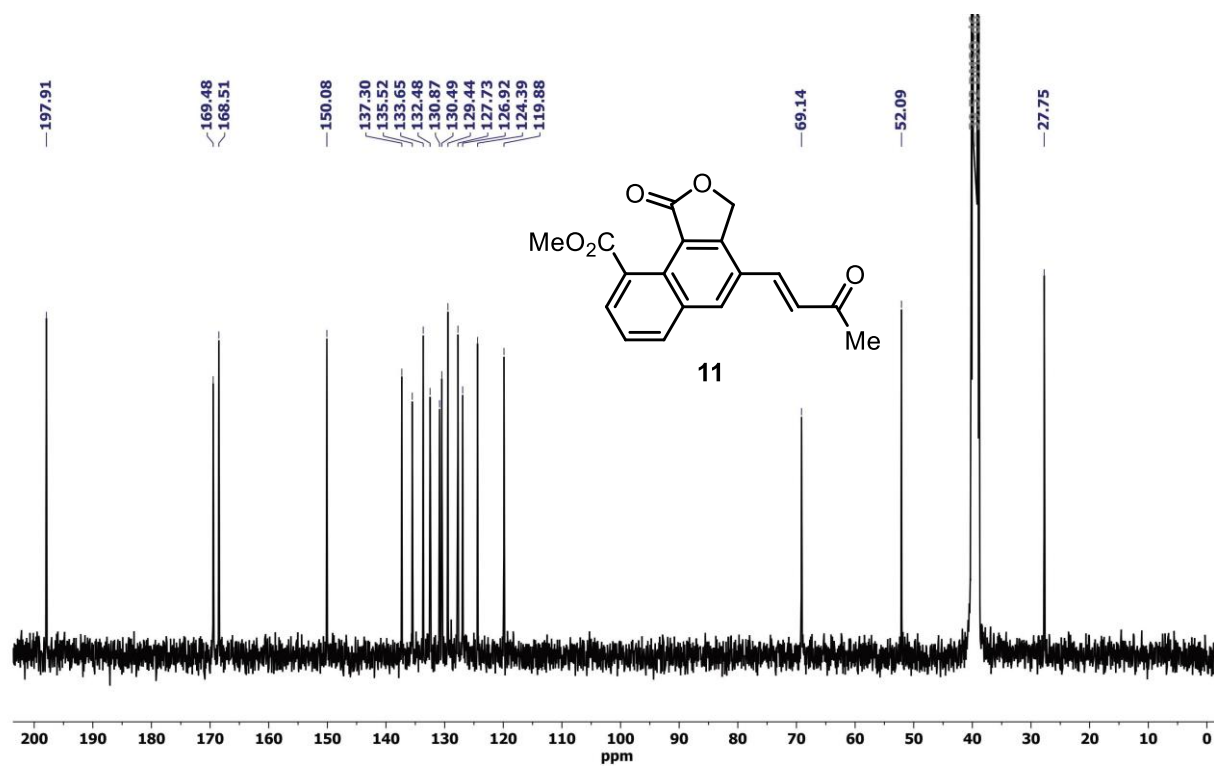

$^1\text{H}$  NMR spectrum of **12** in  $\text{CDCl}_3$

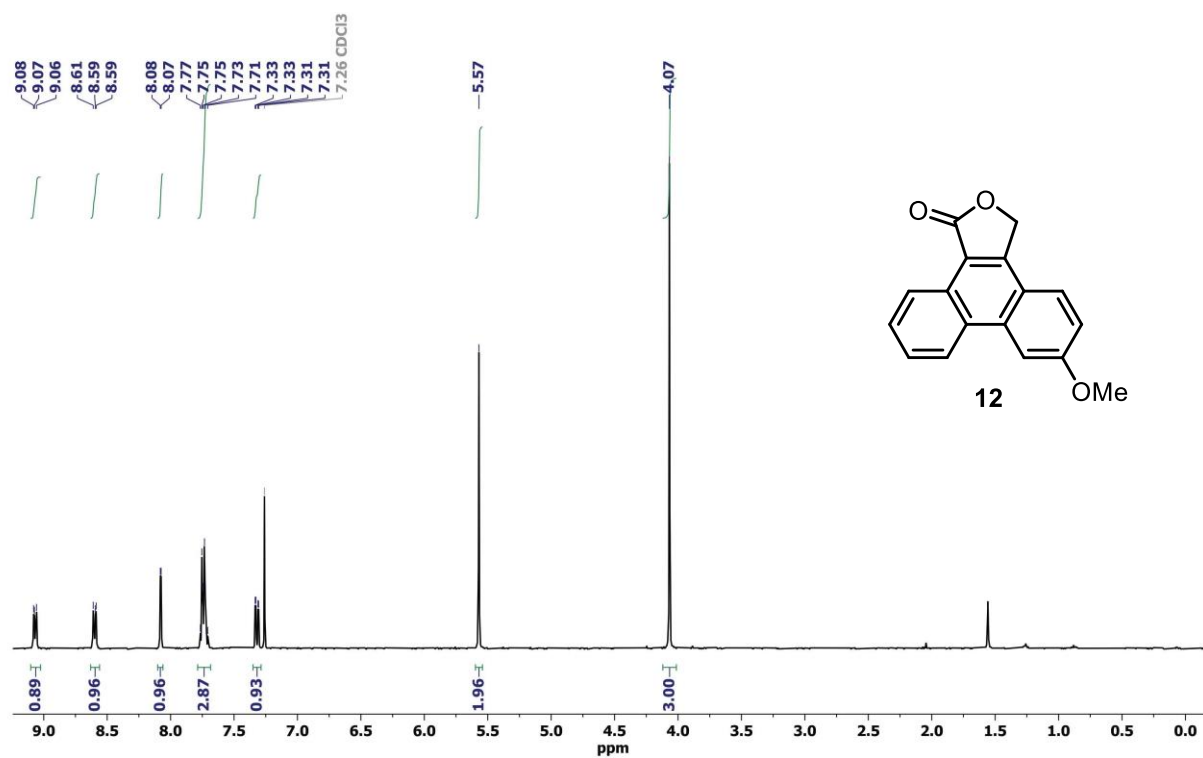

$^1\text{H}$  NMR spectrum of **12** in  $\text{DMSO}-d_6$

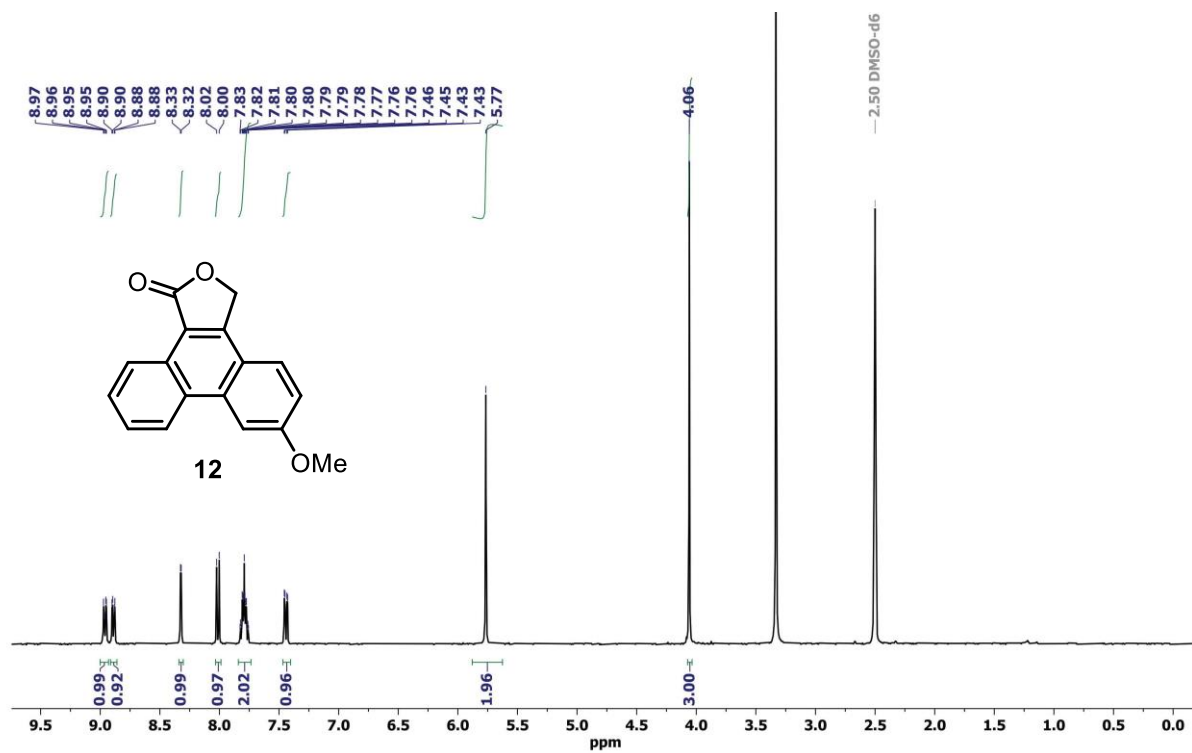



$^{13}\text{C}\{^1\text{H}\}$  NMR spectrum of **12** in  $\text{DMSO-}d_6$

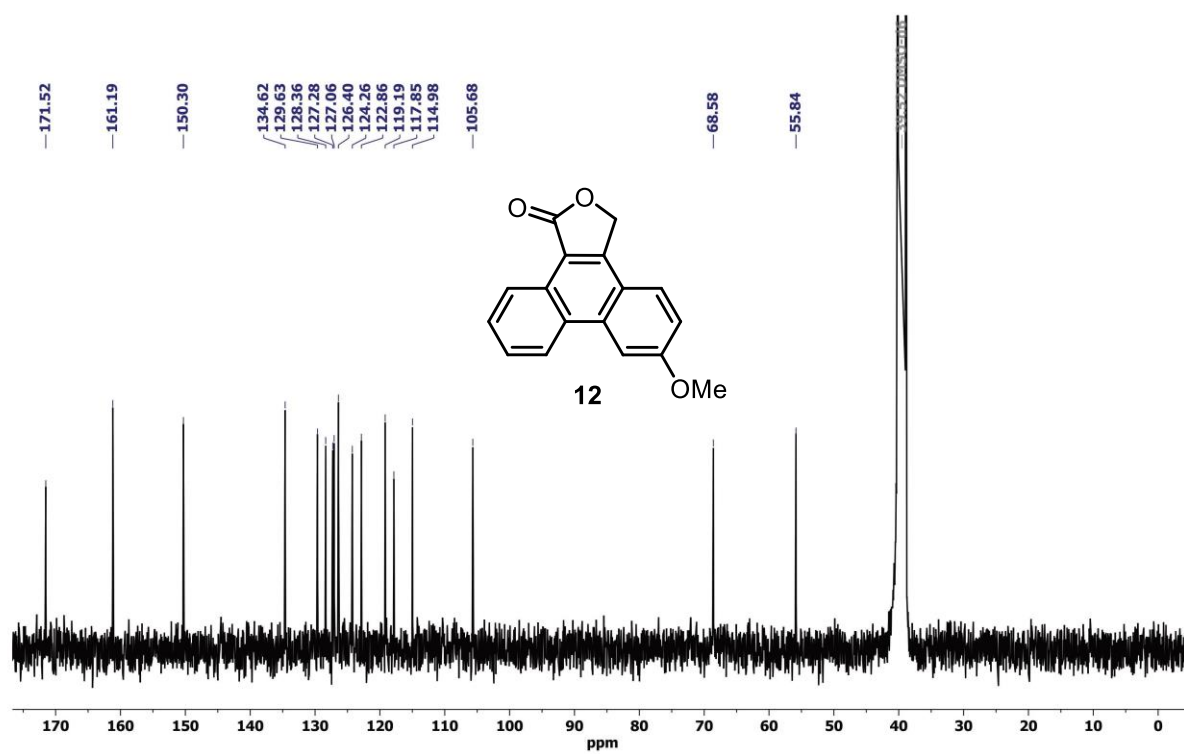

$^1\text{H}$  NMR spectrum of **14** in  $\text{CDCl}_3$

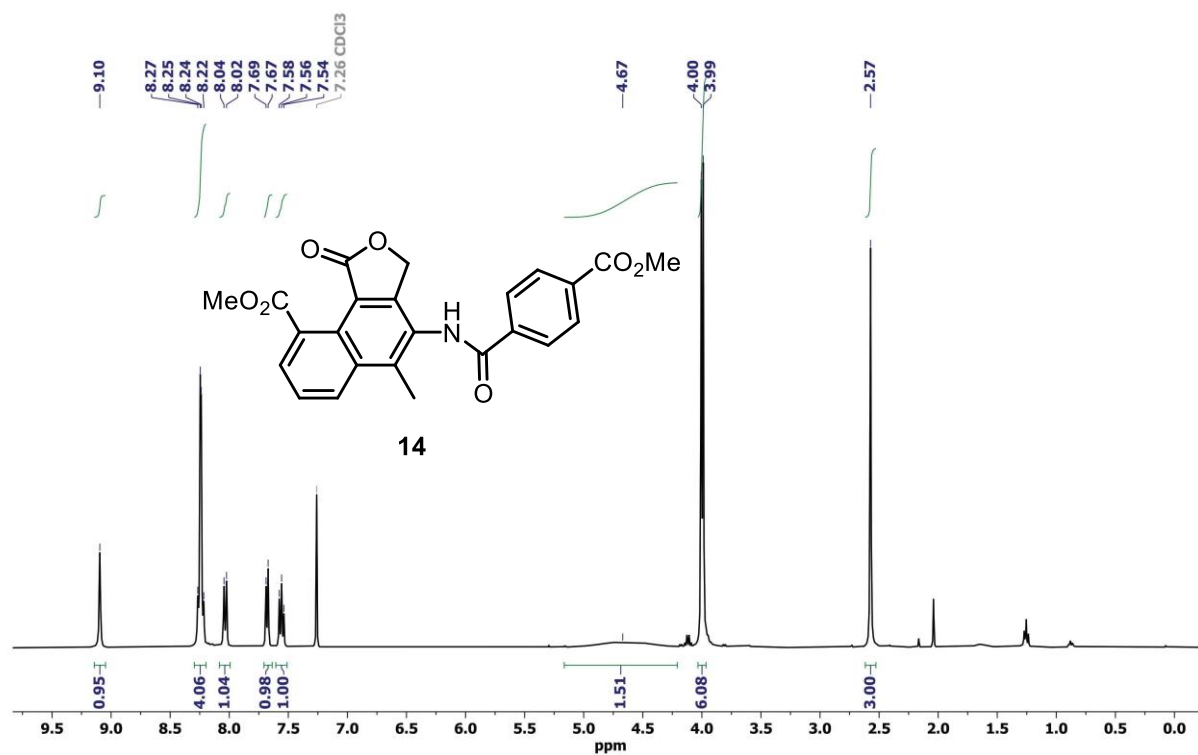

$^1\text{H}$  NMR spectrum of **14** in  $\text{DMSO}-d_6$

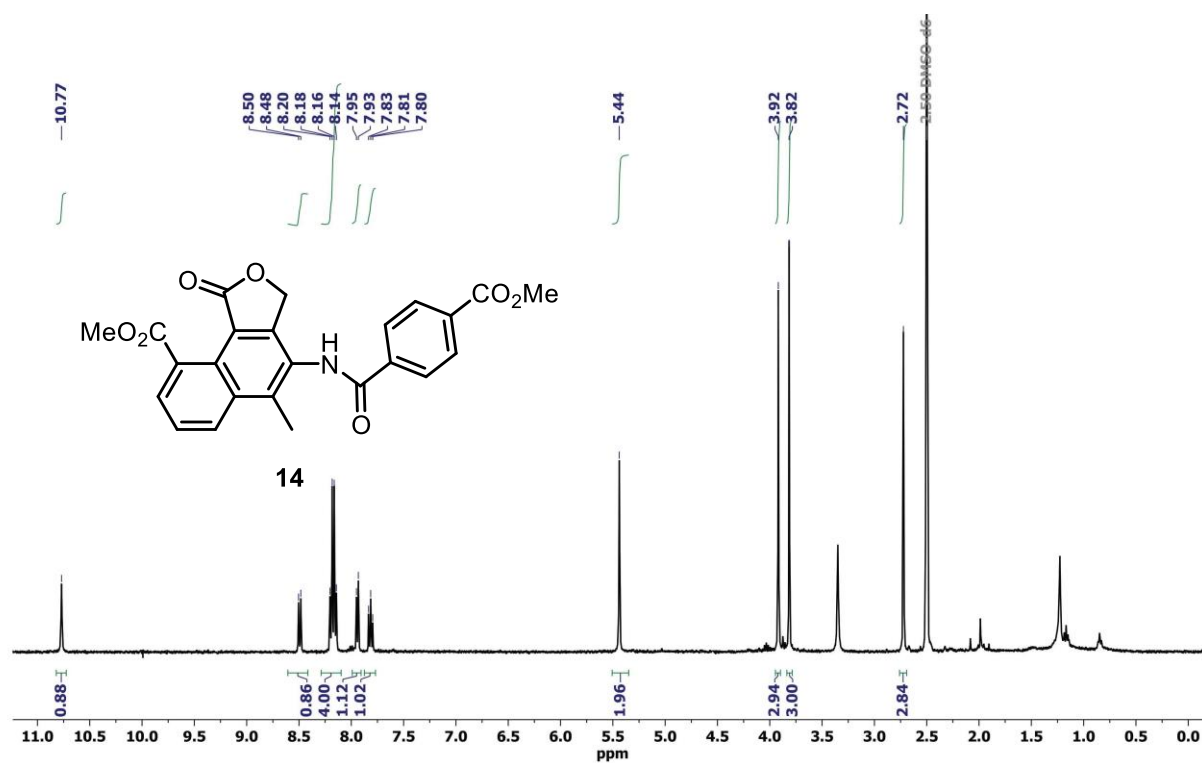

$^{13}\text{C}\{^1\text{H}\}$  NMR spectrum of **14** in  $\text{DMSO-}d_6$

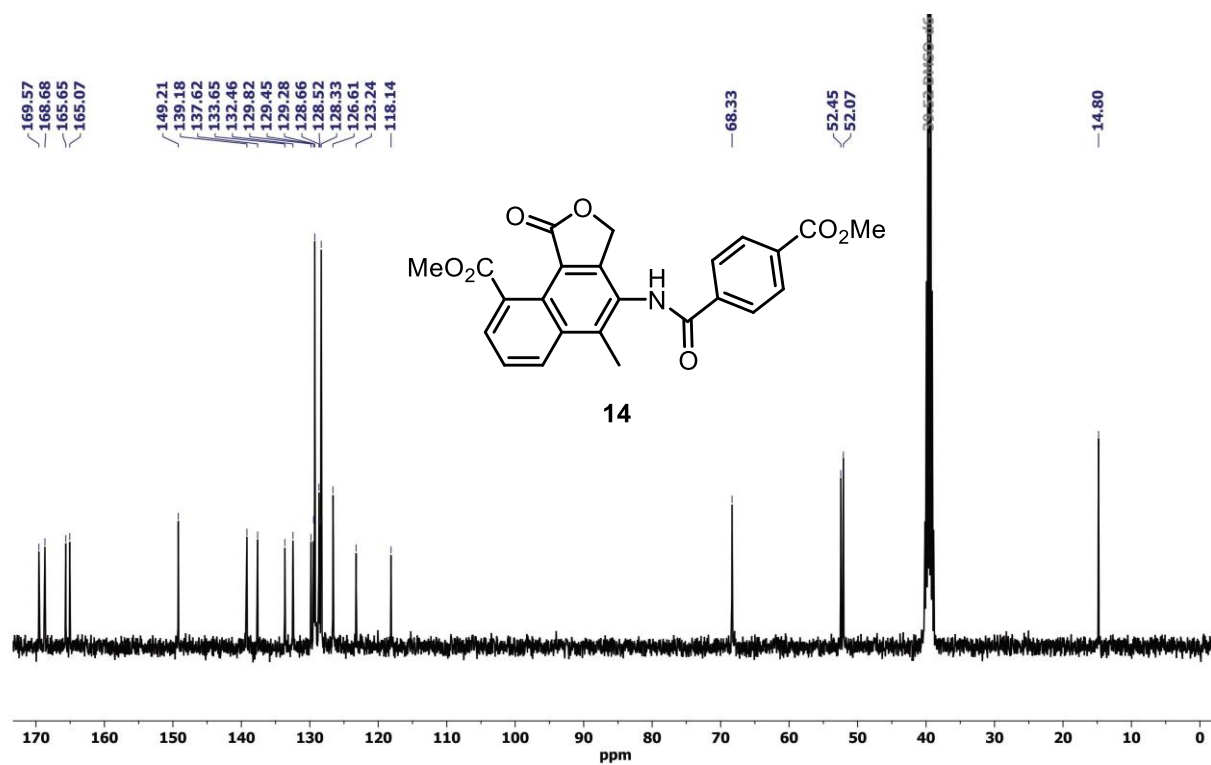

$^1\text{H}$  NMR spectrum of **15** in  $\text{DMSO}-d_6$

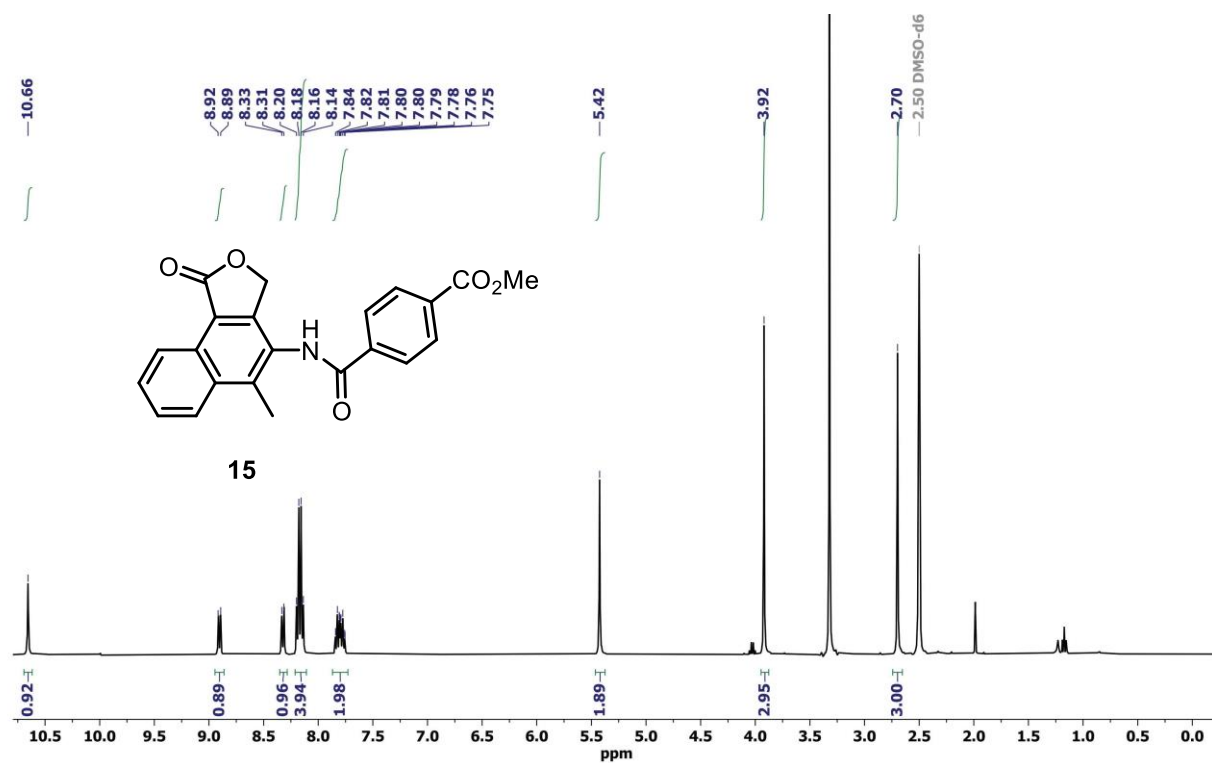

$^{13}\text{C}\{^1\text{H}\}$  NMR spectrum of **15** in  $\text{DMSO}-d_6$

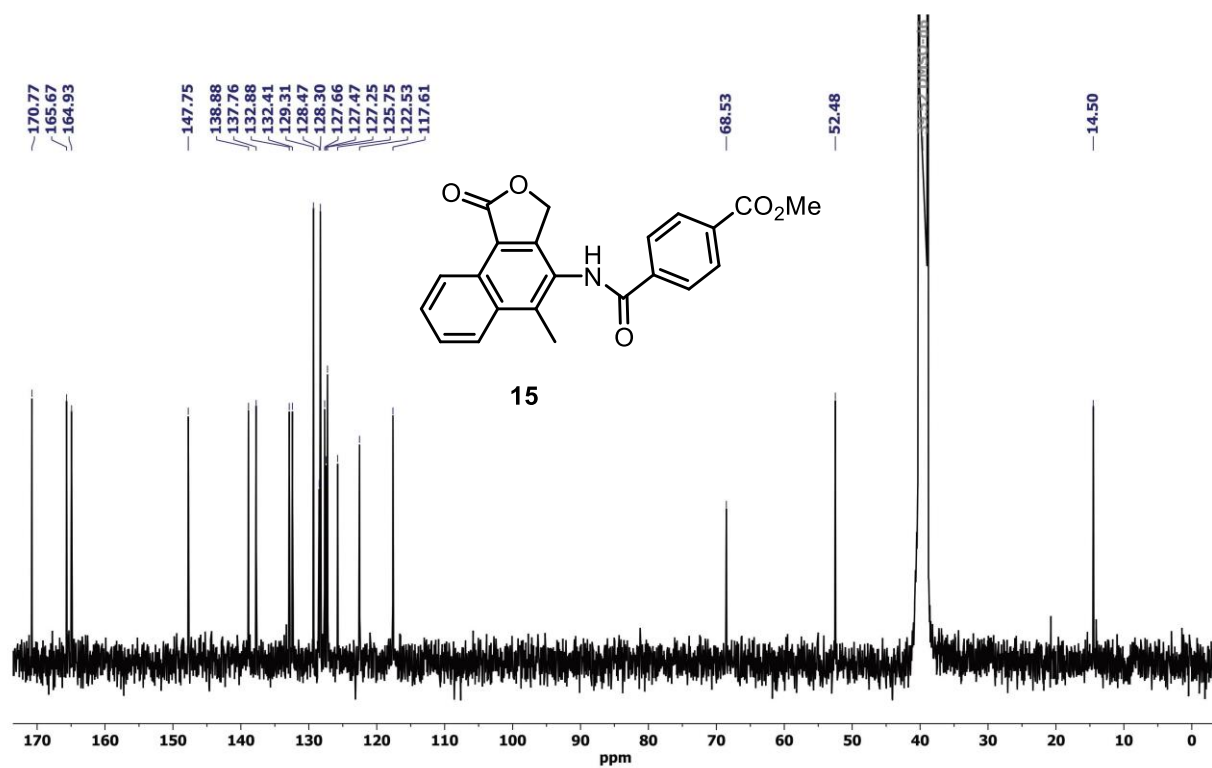

## VI. Copies of HRMS spectra

### HRMS spectrum of 1

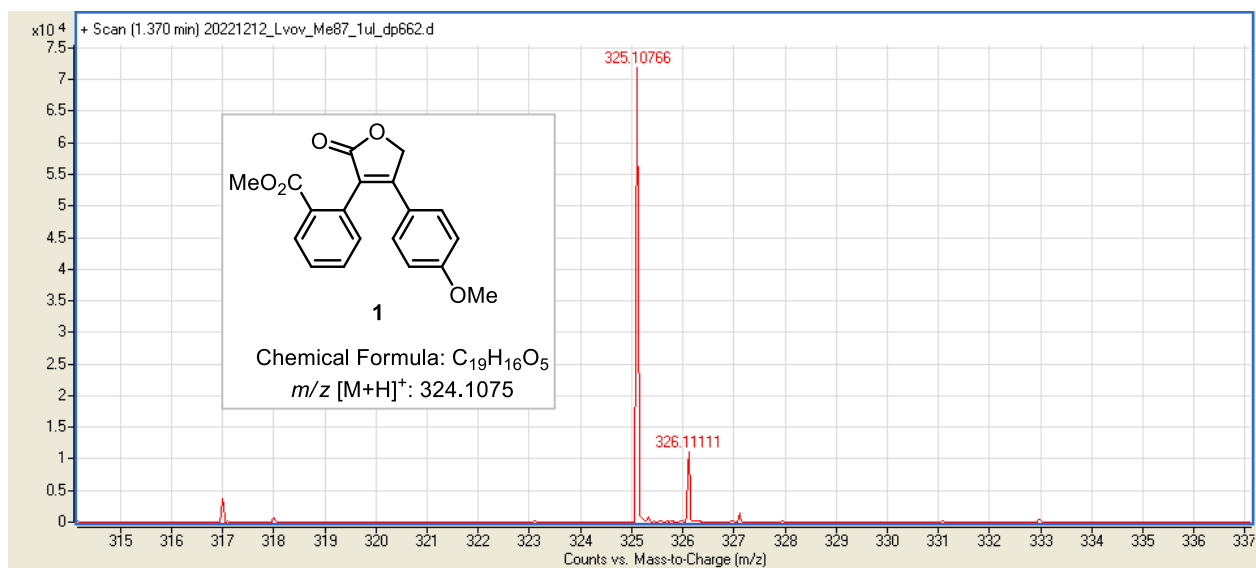

### HRMS spectrum of 2

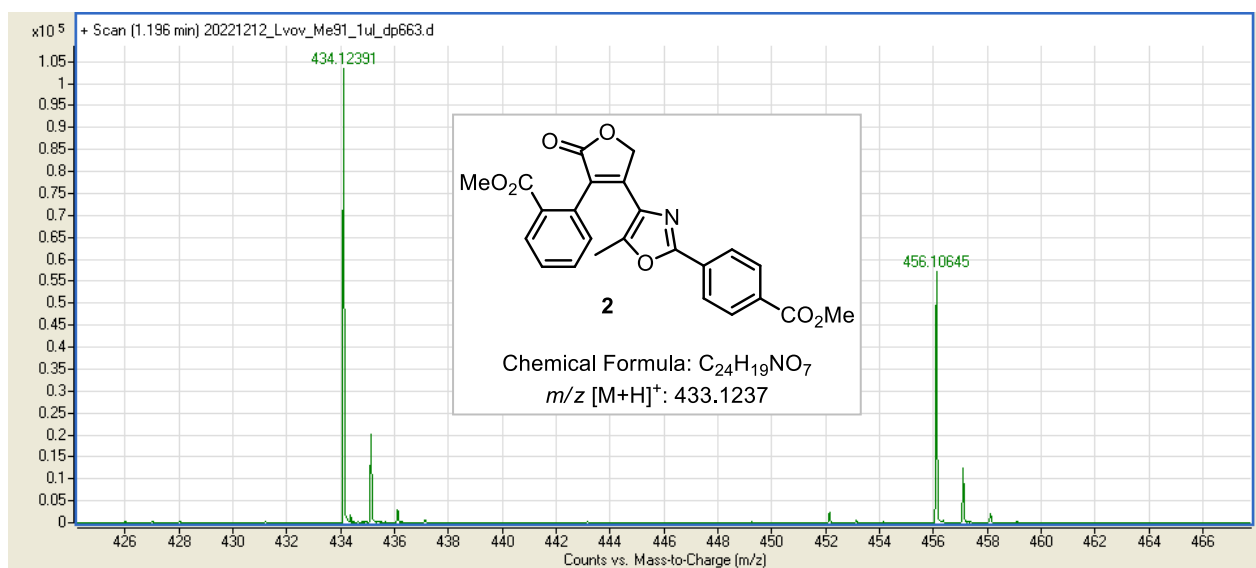

# HRMS spectrum of **6**

## Display Report

### Analysis Info

Analysis Name D:\Data\Kolotyrkina\2023\LvovA\0627018.d  
 Method tune\_low.m  
 Sample Name /SNMR Me-148  
 Comment C18H14O5 mH311.0914 clb added CH3CN

Acquisition Date 27.06.2023 16:08:28

Operator BDAL@DE  
 Instrument / Ser# micrOTOF 10248

### Acquisition Parameter

|             |            |                      |          |                  |           |
|-------------|------------|----------------------|----------|------------------|-----------|
| Source Type | ESI        | Ion Polarity         | Positive | Set Nebulizer    | 0.4 Bar   |
| Focus       | Not active |                      |          | Set Dry Heater   | 180 °C    |
| Scan Begin  | 50 m/z     | Set Capillary        | 4500 V   | Set Dry Gas      | 4.0 l/min |
| Scan End    | 2000 m/z   | Set End Plate Offset | -500 V   | Set Divert Valve | Waste     |

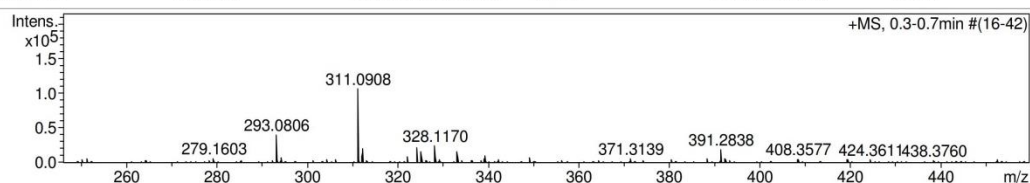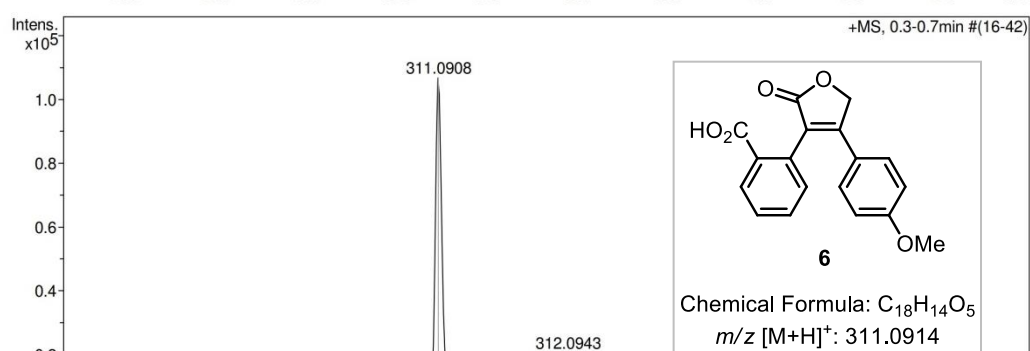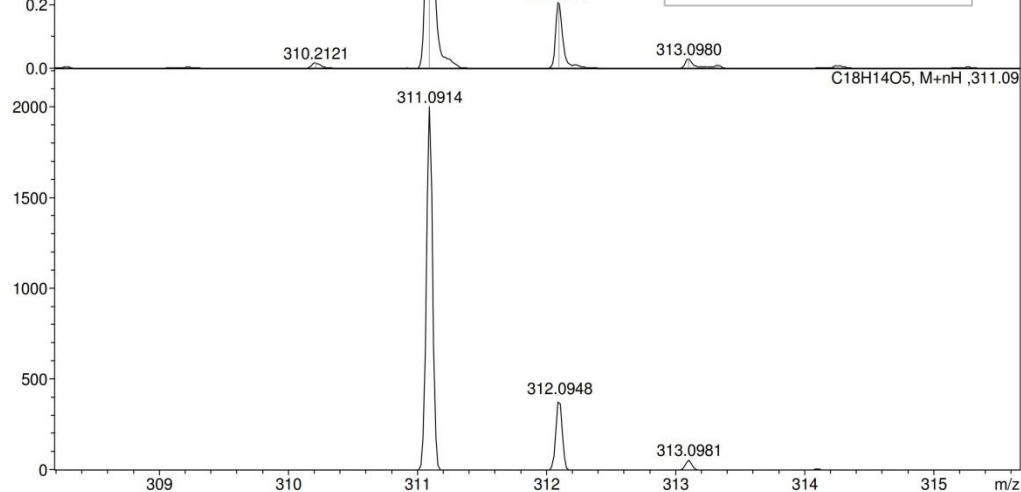

# HRMS spectrum of 7

## Display Report

### Analysis Info

Analysis Name D:\Data\Kolotyrkina\2023\LvovA\0627019.d  
 Method tune\_low.m  
 Sample Name /SNMR Me-141  
 Comment C22H15NO7 mH406.0921 clb added CH3CN

Acquisition Date 27.06.2023 16:15:14

Operator BDAL@DE  
 Instrument / Ser# micrOTOF 10248

### Acquisition Parameter

|             |            |                      |          |                  |           |
|-------------|------------|----------------------|----------|------------------|-----------|
| Source Type | ESI        | Ion Polarity         | Positive | Set Nebulizer    | 0.4 Bar   |
| Focus       | Not active |                      |          | Set Dry Heater   | 180 °C    |
| Scan Begin  | 50 m/z     | Set Capillary        | 4500 V   | Set Dry Gas      | 4.0 l/min |
| Scan End    | 2000 m/z   | Set End Plate Offset | -500 V   | Set Divert Valve | Waste     |

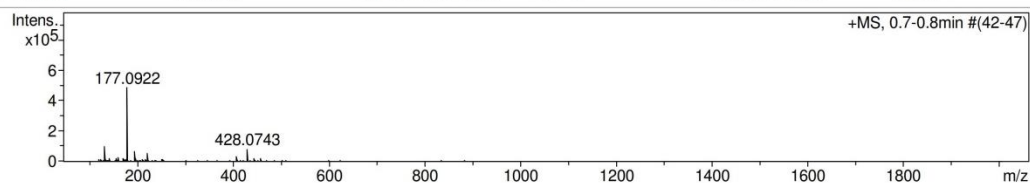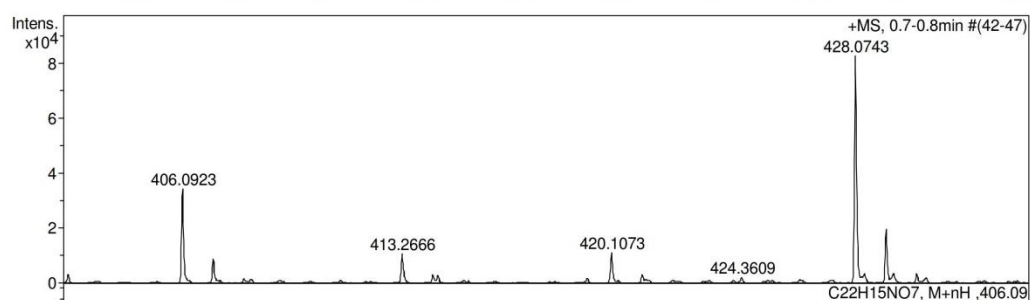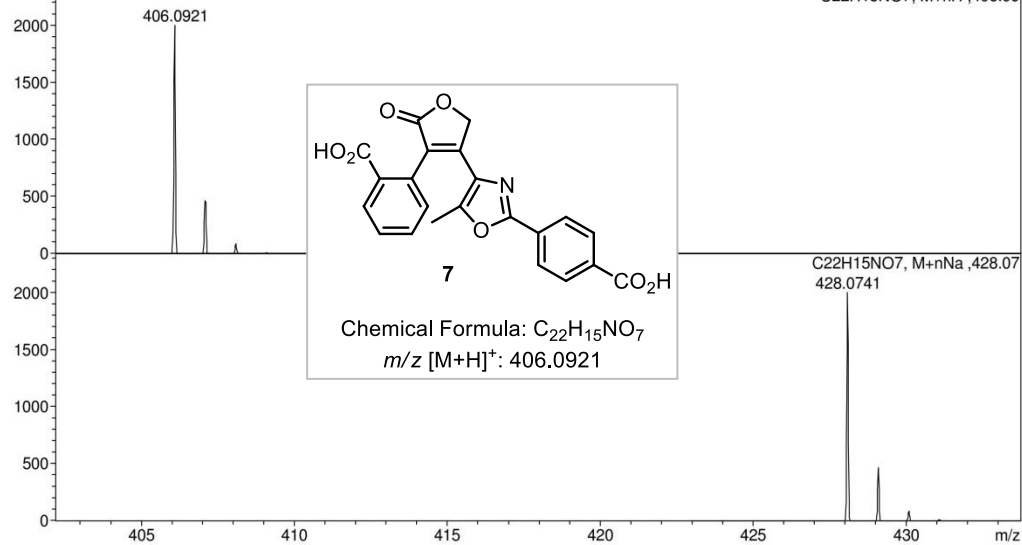

## HRMS spectrum of **8**

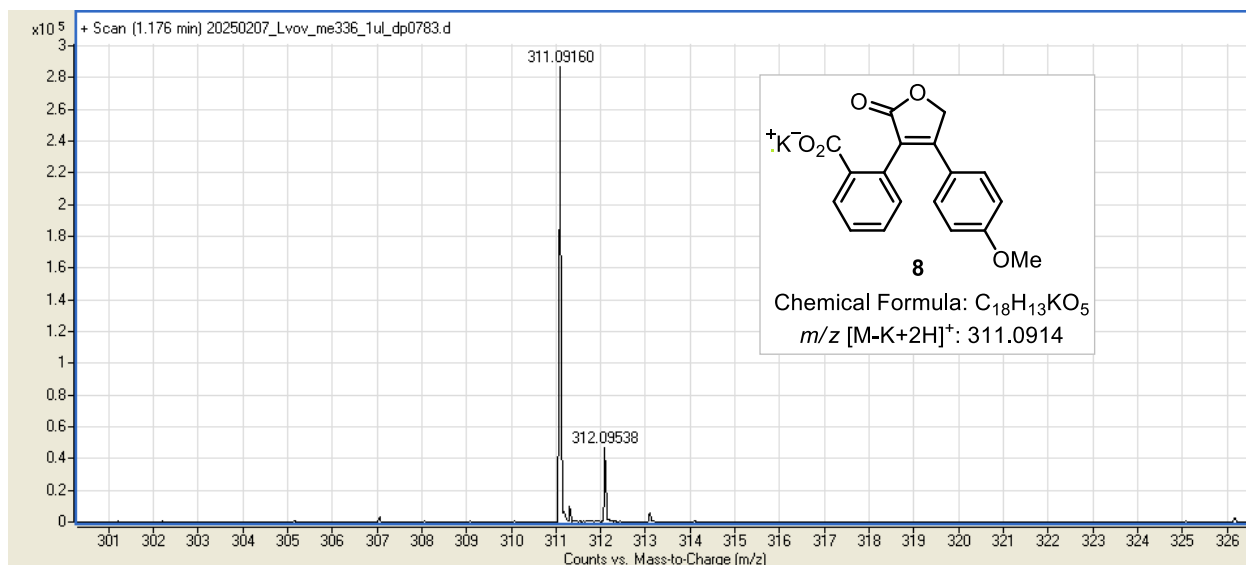

## HRMS spectrum of **9**

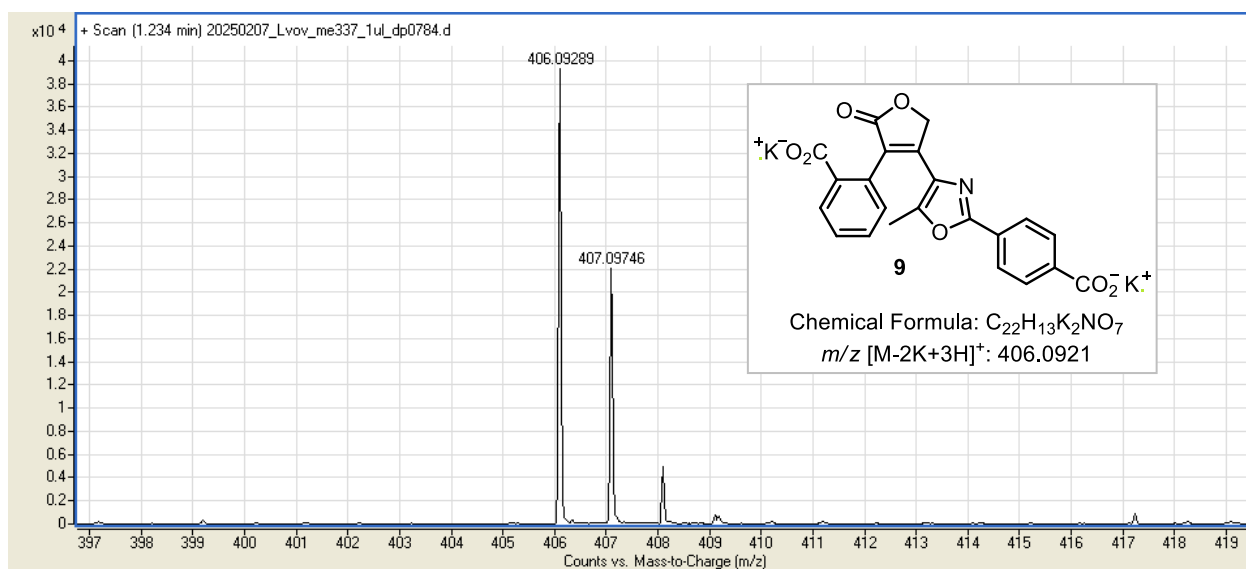



# HRMS spectrum of **10**

## Display Report

### Analysis Info

Analysis Name D:\Data\Kolotyrkina\2023\LvovA\0627024.d  
 Method tune\_low.m  
 Sample Name /SNMR Me-105a-2  
 Comment C19H14O5 mH323.0914 clb added CH3CN

Acquisition Date 27.06.2023 16:42:54  
 Operator BDAL@DE  
 Instrument / Ser# micrOTOF 10248

### Acquisition Parameter

|             |            |                      |          |                  |           |
|-------------|------------|----------------------|----------|------------------|-----------|
| Source Type | ESI        | Ion Polarity         | Positive | Set Nebulizer    | 0.4 Bar   |
| Focus       | Not active |                      |          | Set Dry Heater   | 180 °C    |
| Scan Begin  | 50 m/z     | Set Capillary        | 4500 V   | Set Dry Gas      | 4.0 l/min |
| Scan End    | 2000 m/z   | Set End Plate Offset | -500 V   | Set Divert Valve | Waste     |

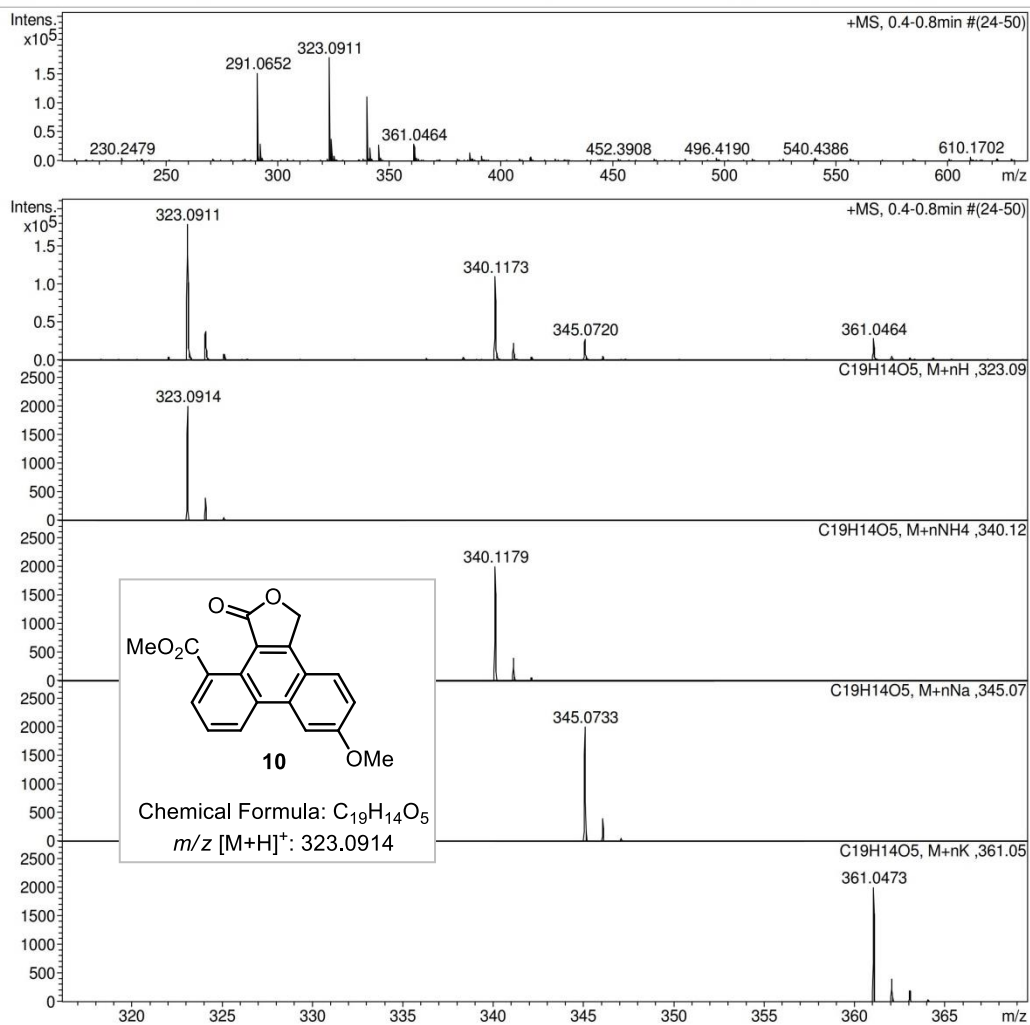

# HRMS spectrum of **11**

## Display Report

### Analysis Info

Analysis Name D:\Data\Kolotyrkina\2023\LvovA\0627020.d  
 Method tune\_low.m  
 Sample Name /SNMR Me-105a-3  
 Comment C18H14O5 mH311.0914 clb added CH3CN

Acquisition Date 27.06.2023 16:21:51

Operator BDAL@DE  
 Instrument / Ser# micrOTOF 10248

### Acquisition Parameter

|             |            |                      |          |                  |           |
|-------------|------------|----------------------|----------|------------------|-----------|
| Source Type | ESI        | Ion Polarity         | Positive | Set Nebulizer    | 0.4 Bar   |
| Focus       | Not active |                      |          | Set Dry Heater   | 180 °C    |
| Scan Begin  | 50 m/z     | Set Capillary        | 4500 V   | Set Dry Gas      | 4.0 l/min |
| Scan End    | 2000 m/z   | Set End Plate Offset | -500 V   | Set Divert Valve | Waste     |

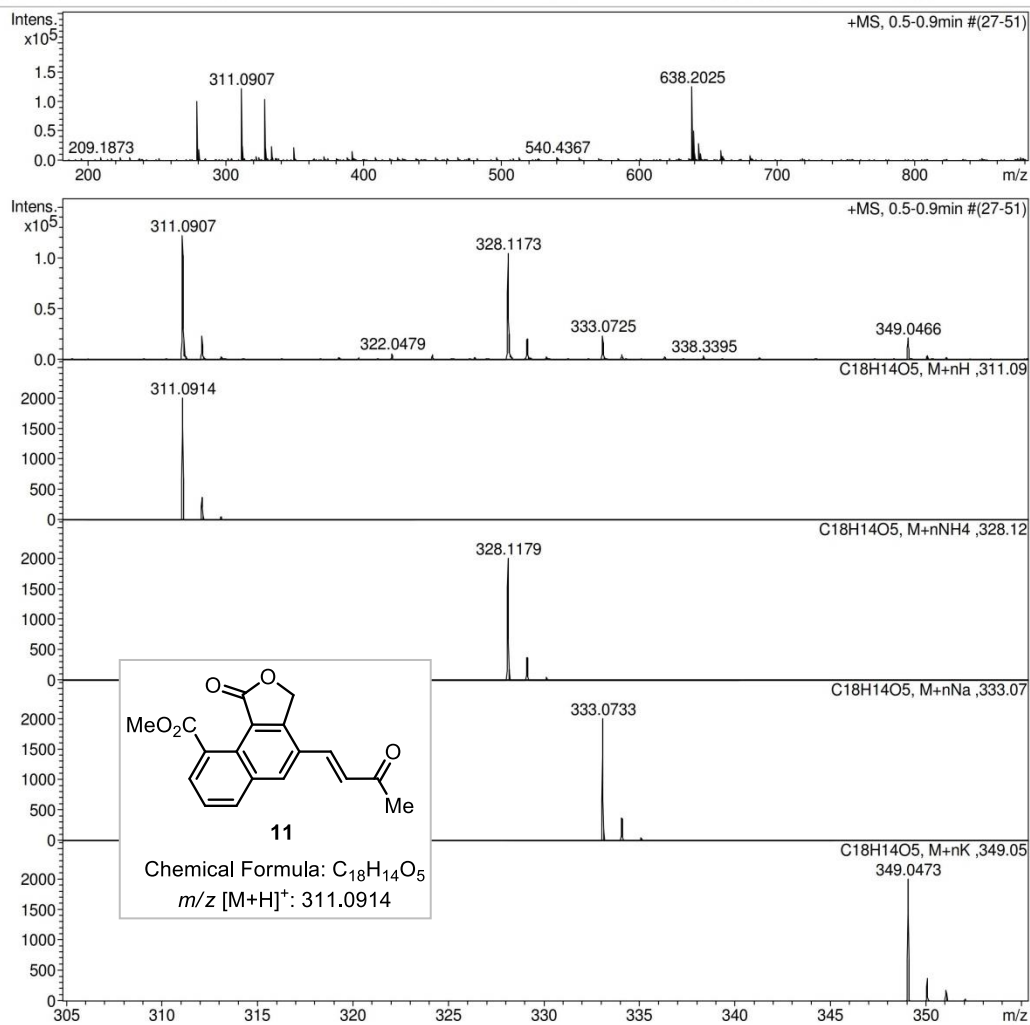

# HRMS spectrum of 12

## Display Report

### Analysis Info

Analysis Name D:\Data\Kolotyrkina\2023\LvovA\0627017.d  
 Method tune\_low.m  
 Sample Name /SNMR Me-105a-1  
 Comment C17H12O3 mH265.0859 clb added CH3CN

Acquisition Date 27.06.2023 16:02:56

Operator BDAL@DE  
 Instrument / Ser# micrOTOF 10248

### Acquisition Parameter

|             |            |                      |          |                  |           |
|-------------|------------|----------------------|----------|------------------|-----------|
| Source Type | ESI        | Ion Polarity         | Positive | Set Nebulizer    | 0.4 Bar   |
| Focus       | Not active |                      |          | Set Dry Heater   | 180 °C    |
| Scan Begin  | 50 m/z     | Set Capillary        | 4500 V   | Set Dry Gas      | 4.0 l/min |
| Scan End    | 2000 m/z   | Set End Plate Offset | -500 V   | Set Divert Valve | Waste     |

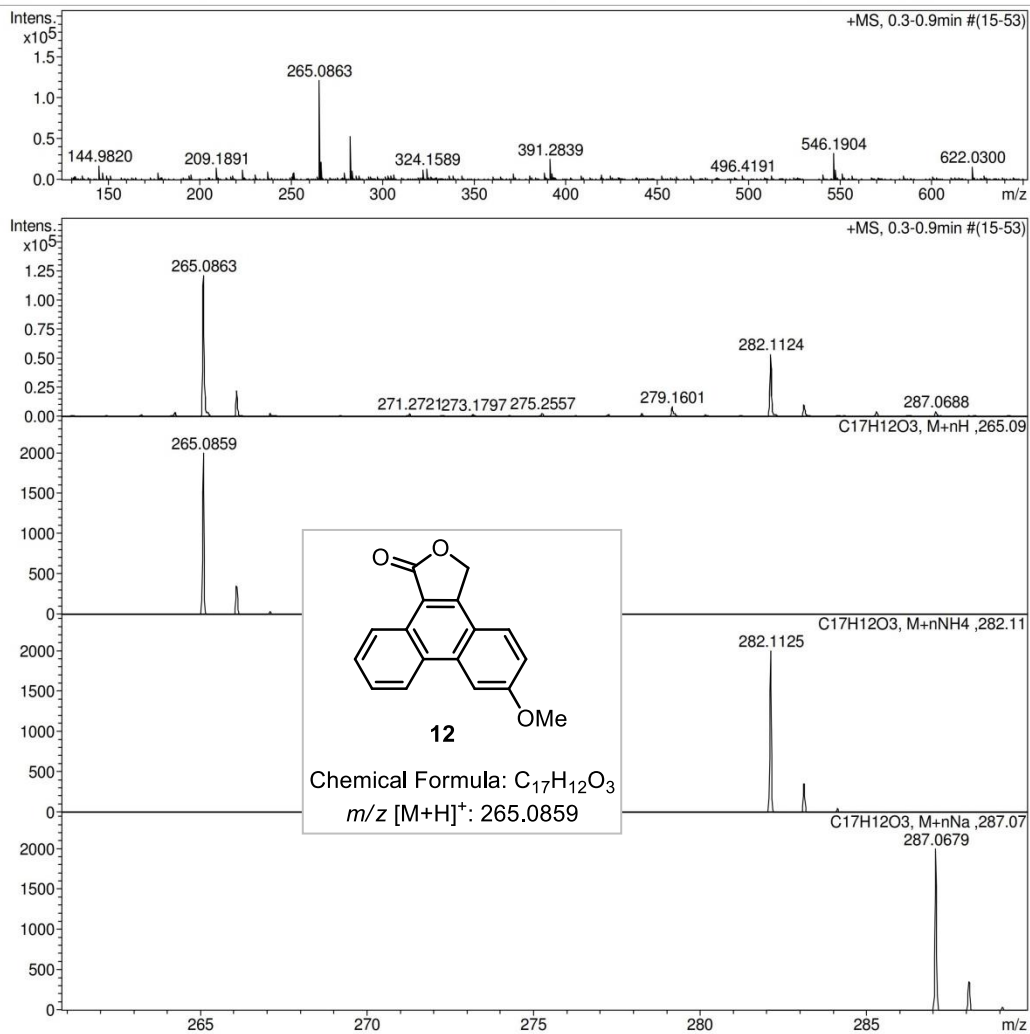

# HRMS spectrum of 14

## Display Report

### Analysis Info

Analysis Name D:\Data\Kolotyrkina\2023\LvovA\0627025.d  
 Method tune\_low.m  
 Sample Name /SNMR Me-97  
 Comment C24H19NO7 mH434.1234 clb added CH3CN

Acquisition Date 27.06.2023 16:50:58

Operator BDAL@DE  
 Instrument / Ser# micrOTOF 10248

### Acquisition Parameter

|             |            |                      |          |                  |           |
|-------------|------------|----------------------|----------|------------------|-----------|
| Source Type | ESI        | Ion Polarity         | Positive | Set Nebulizer    | 0.4 Bar   |
| Focus       | Not active |                      |          | Set Dry Heater   | 180 °C    |
| Scan Begin  | 50 m/z     | Set Capillary        | 4500 V   | Set Dry Gas      | 4.0 l/min |
| Scan End    | 2000 m/z   | Set End Plate Offset | -500 V   | Set Divert Valve | Waste     |

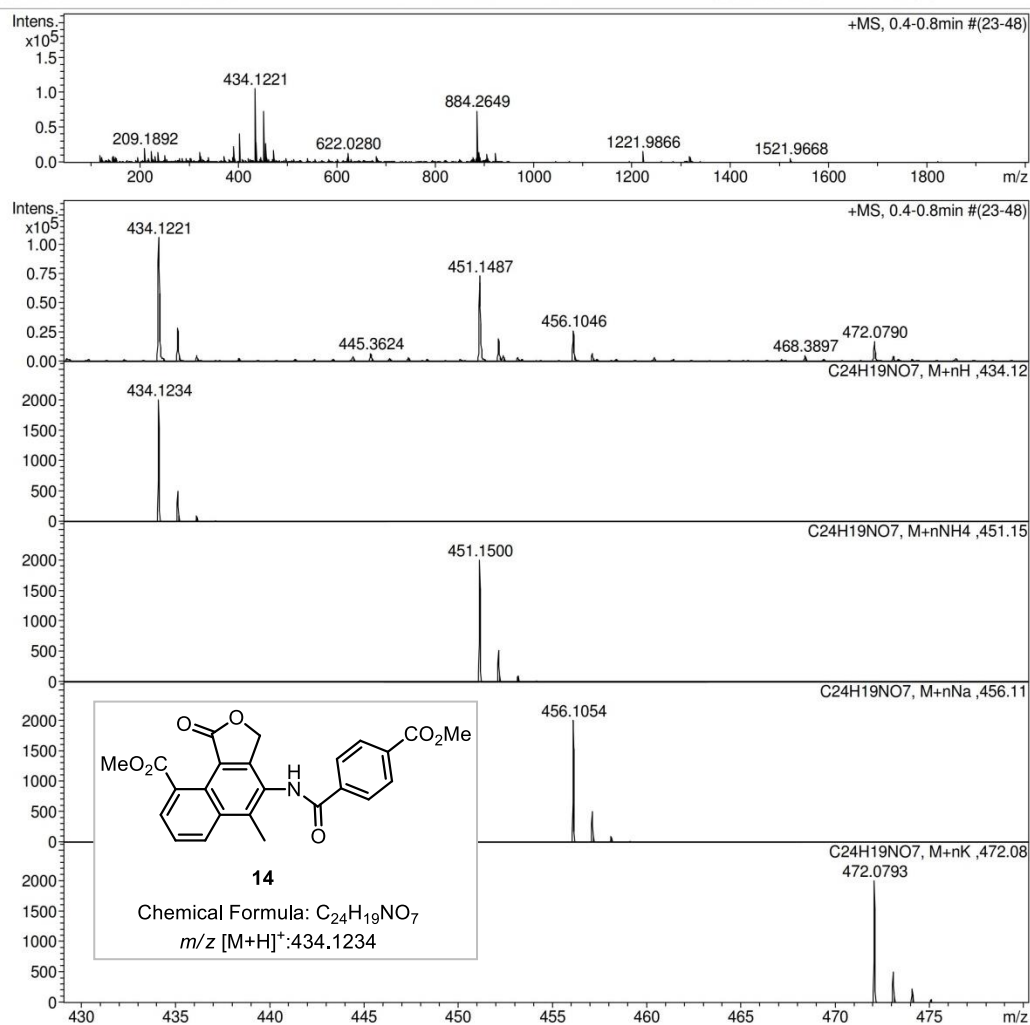

## HRMS spectrum of **15**

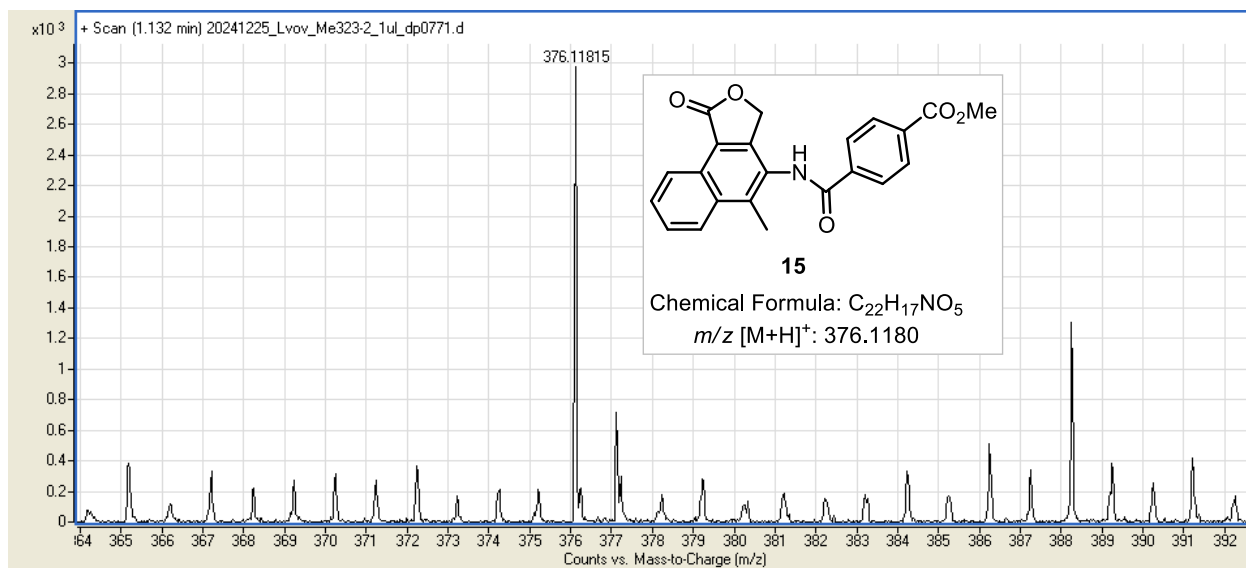

Supplement: d5ob01693b1.pdf [file d5ob01693b1.pdf]
